# Supplementary material for: The kinase Rio1 and a ribosome collision-dependent decay pathway survey the integrity of 18S rRNA cleavage
Source: PubMed Central journal article supplement (PMC11045238; doi:10.1371/journal.pbio.3001767), 2024-04-25

# Figure 2B

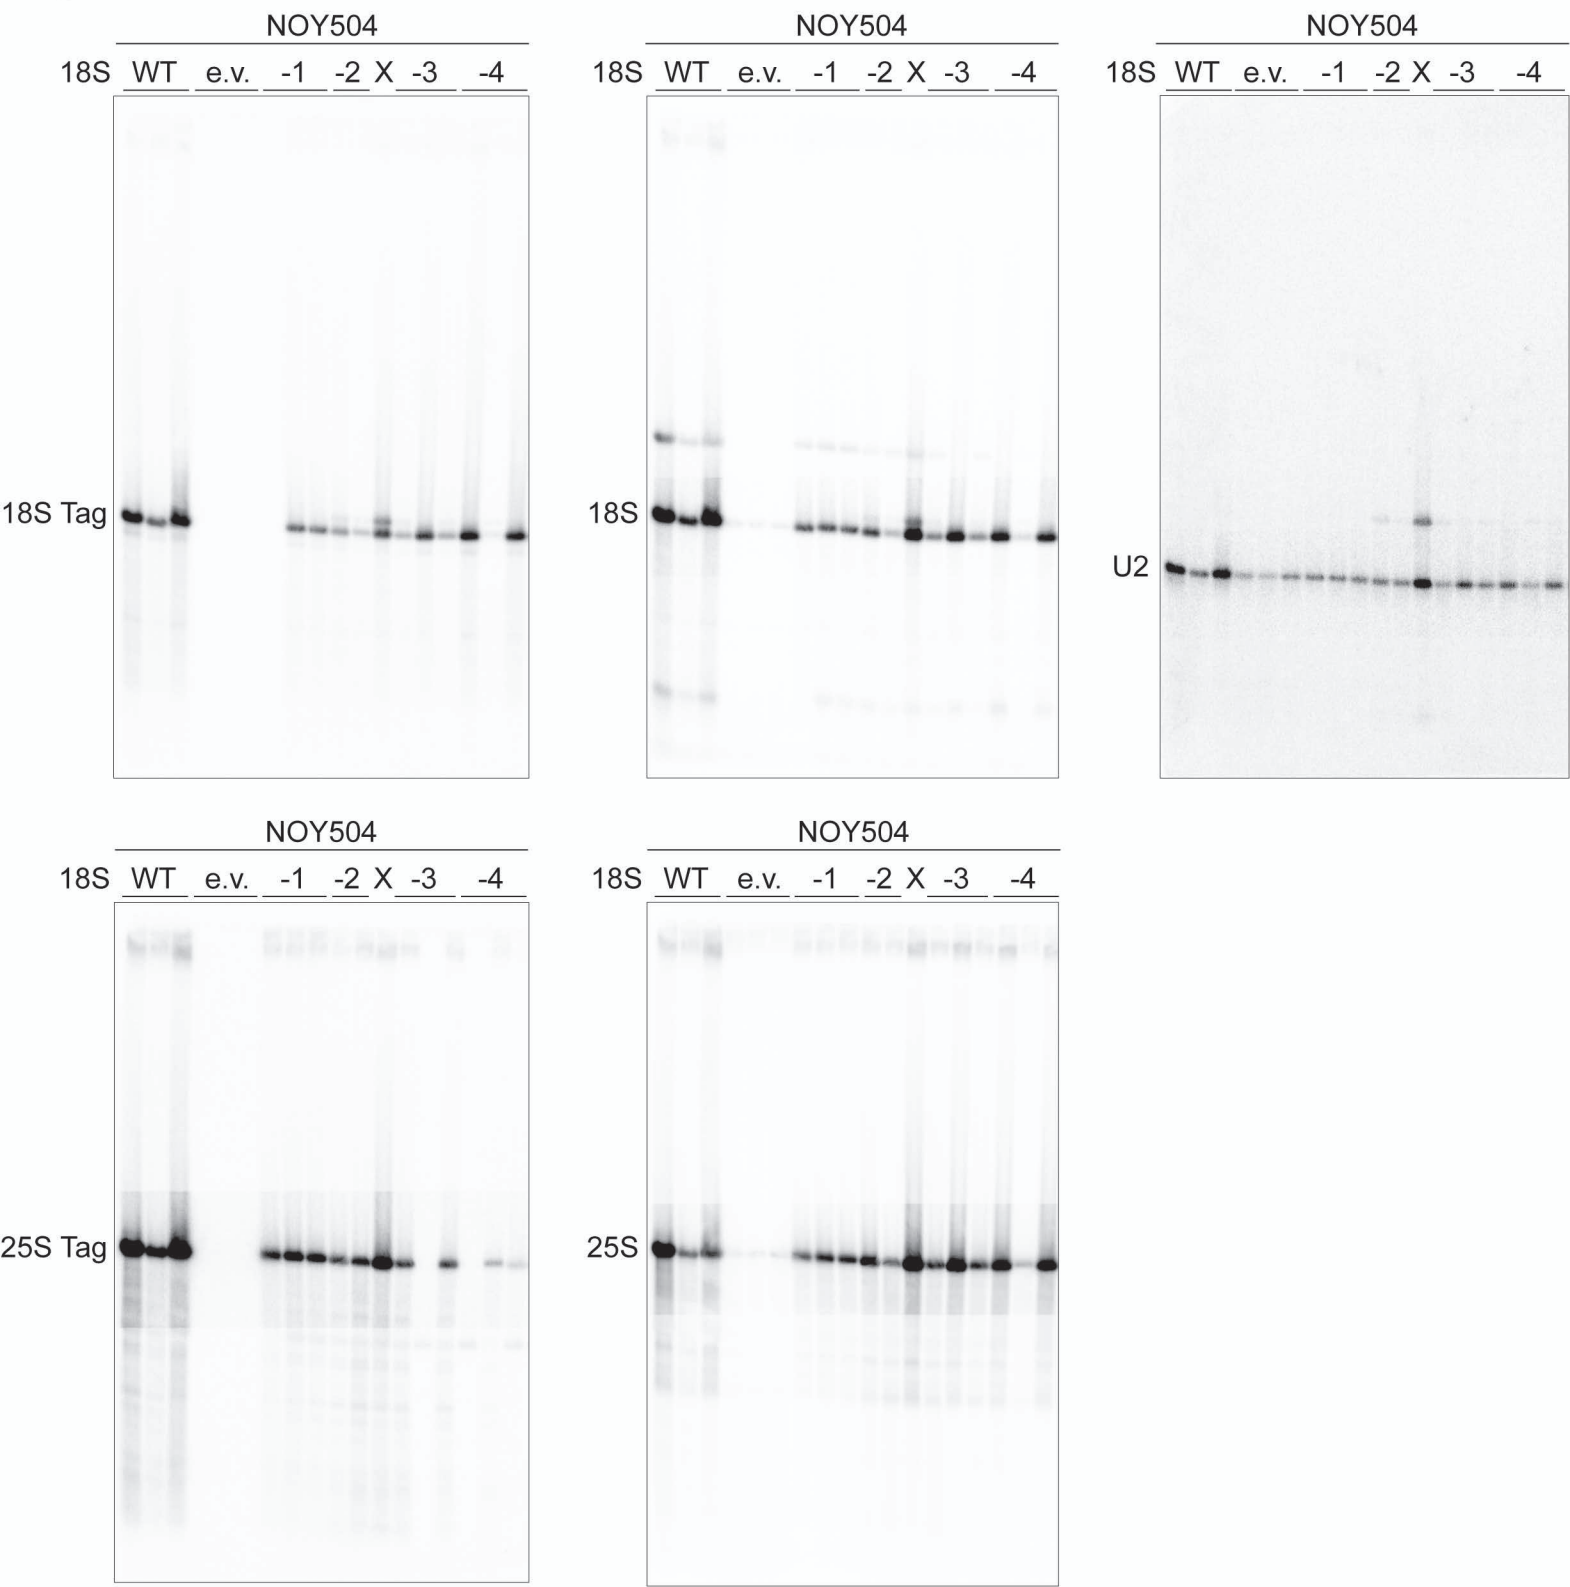

# Figure 2C

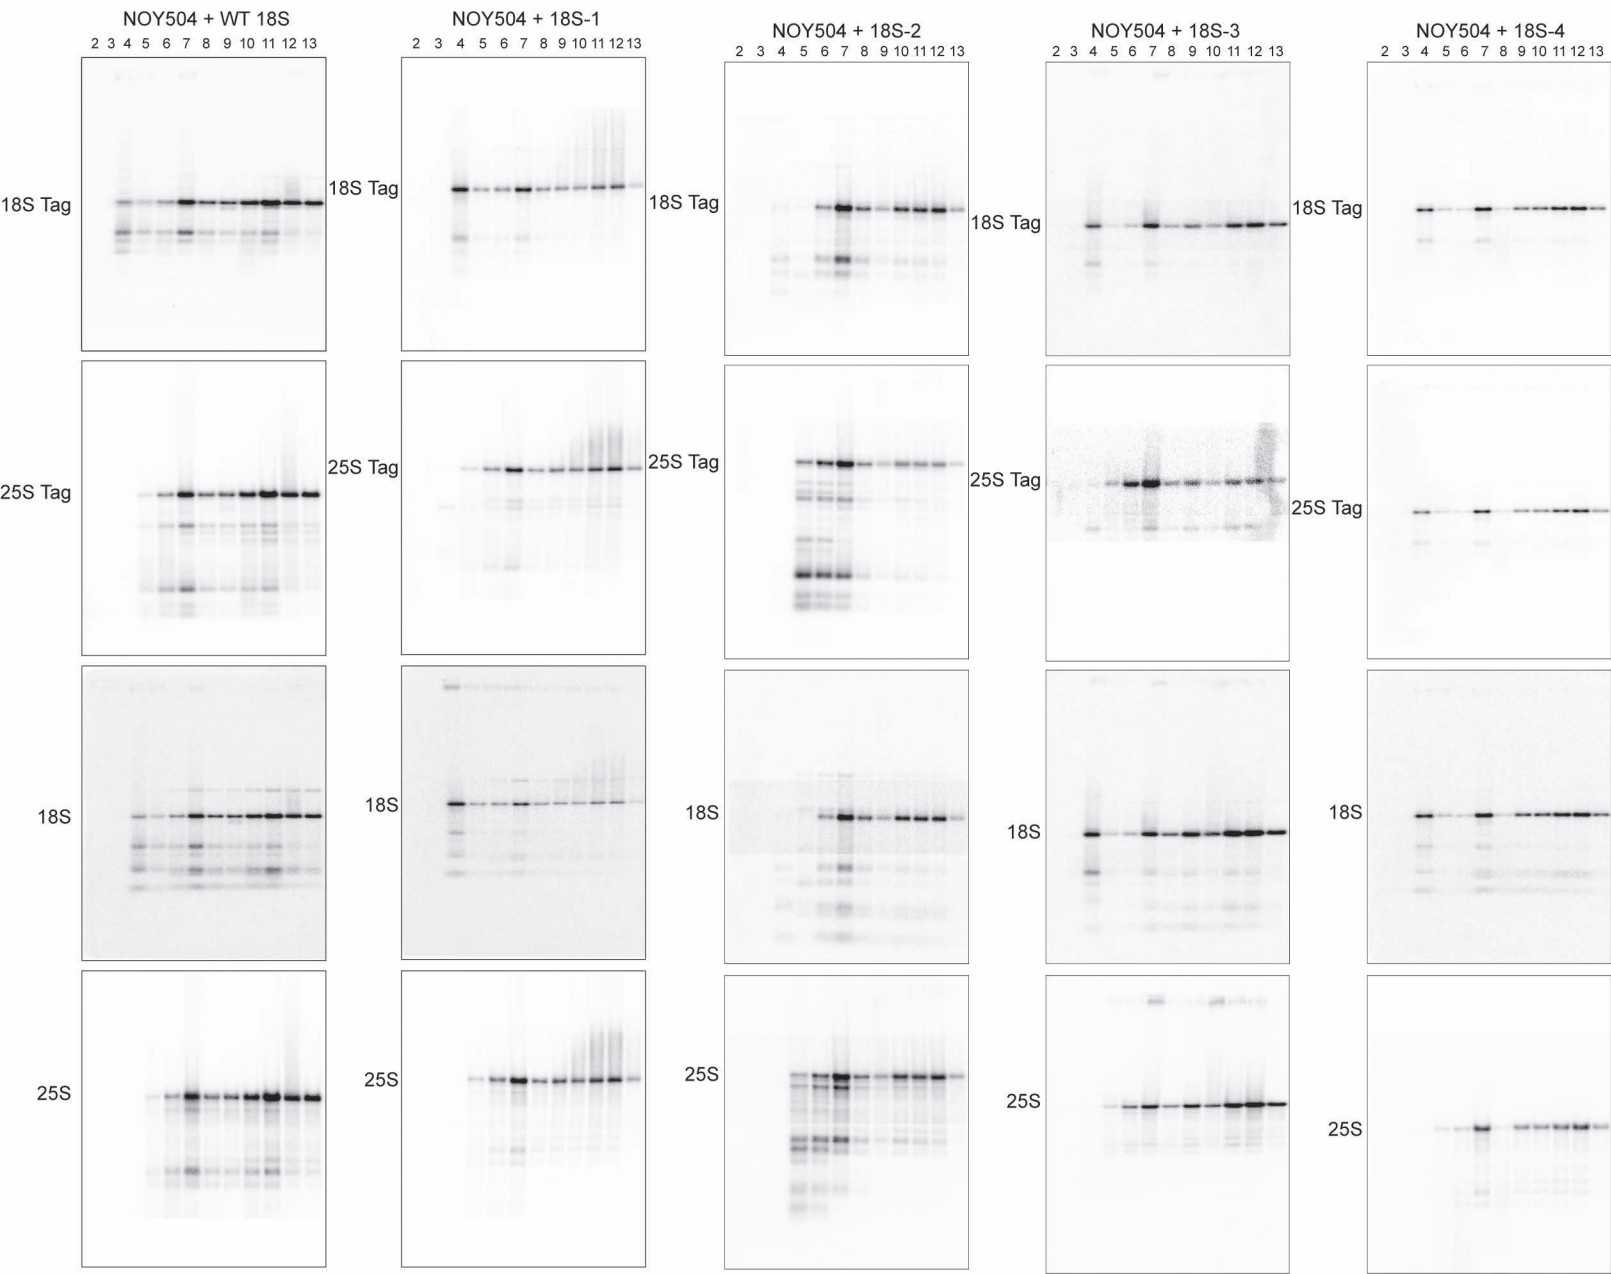

# Figure 3B

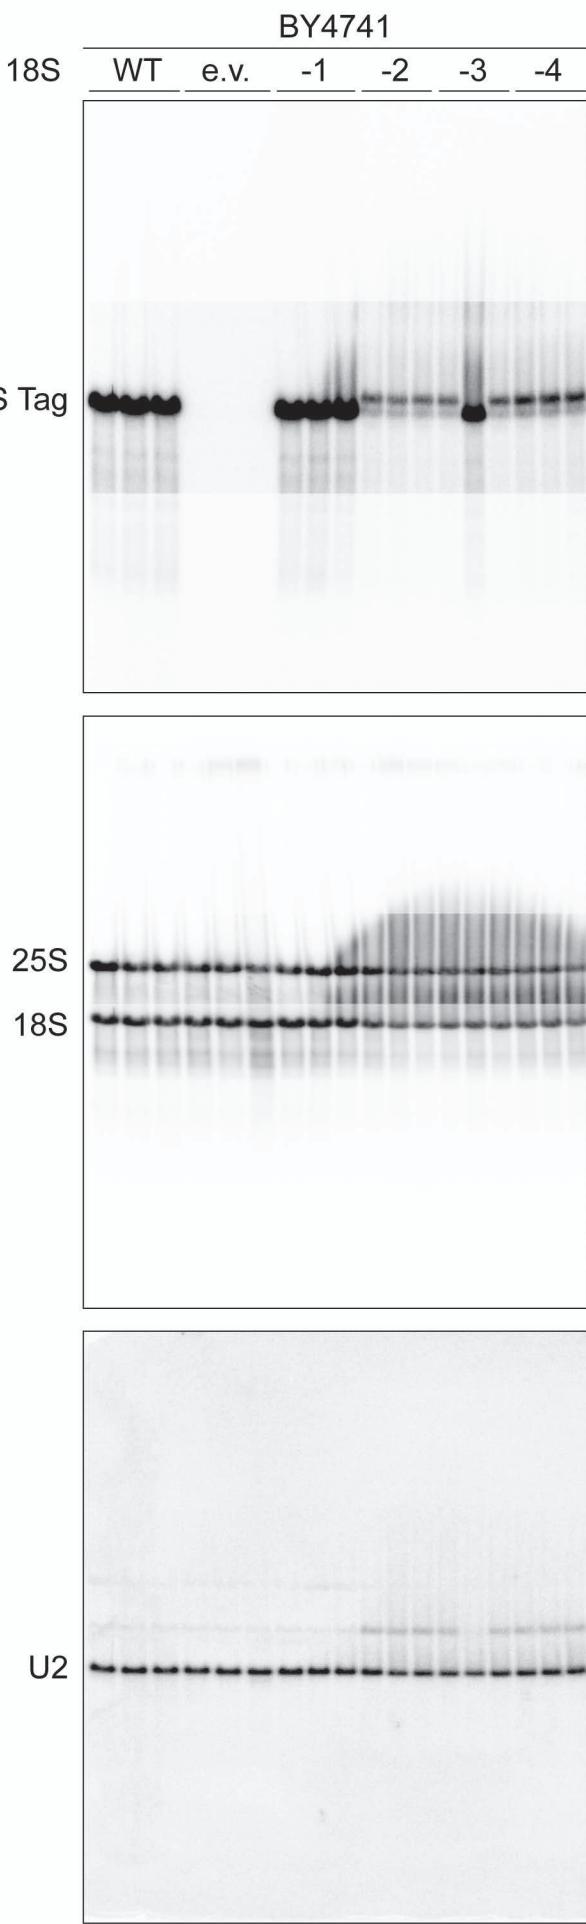

# Figure 3C

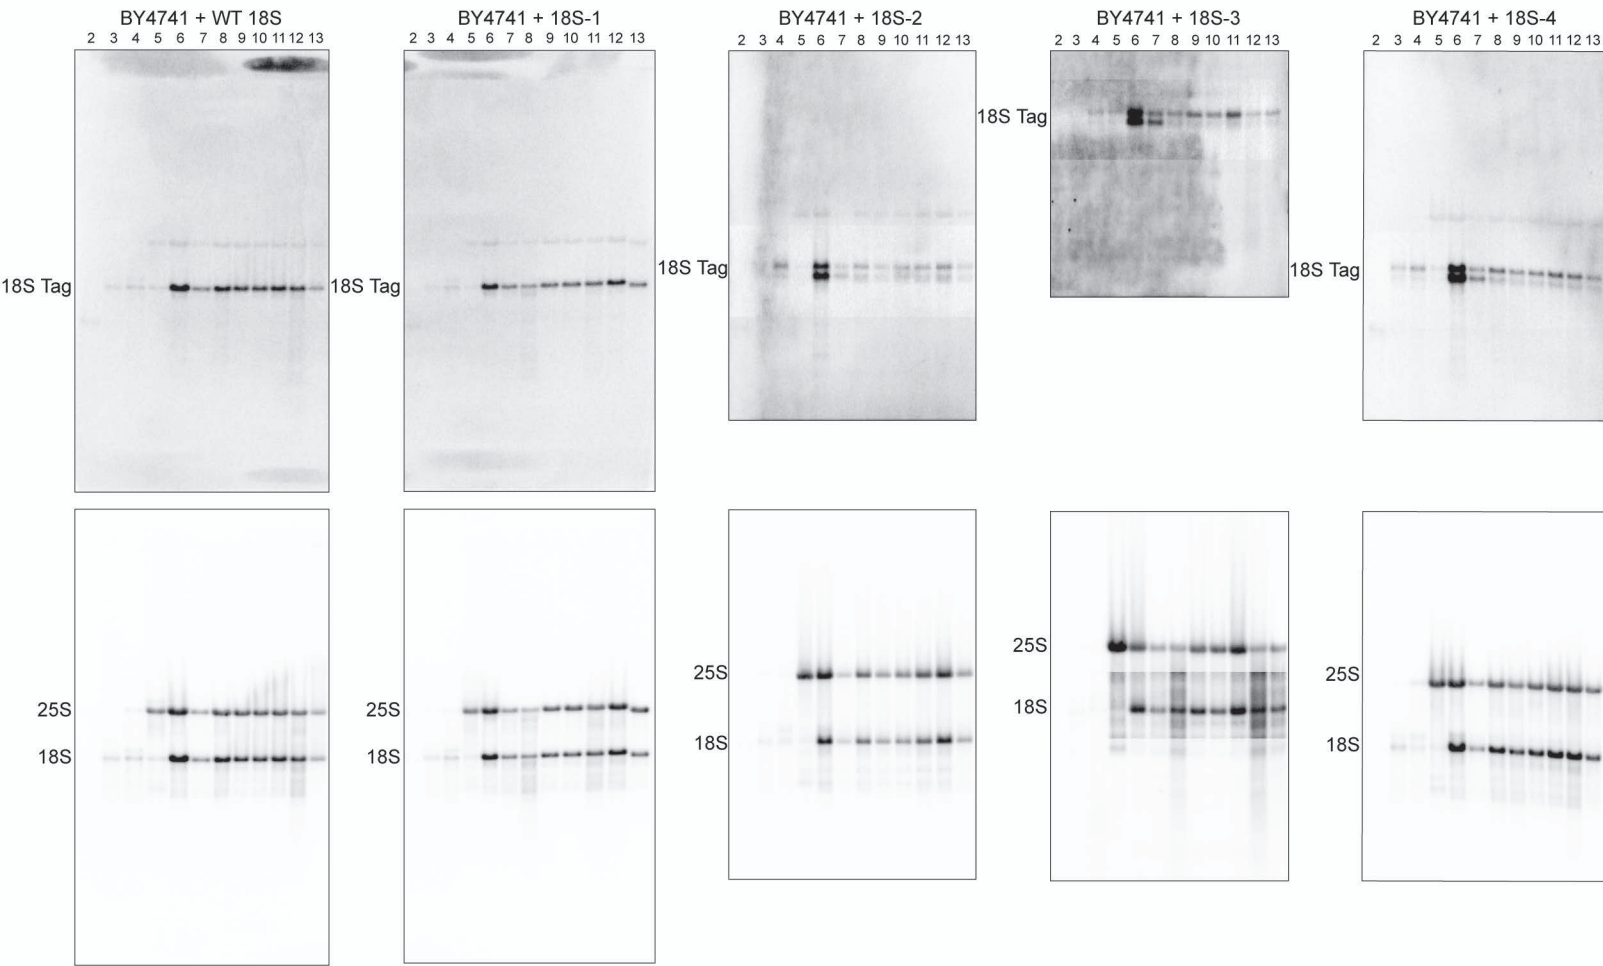

**Figure 4B**

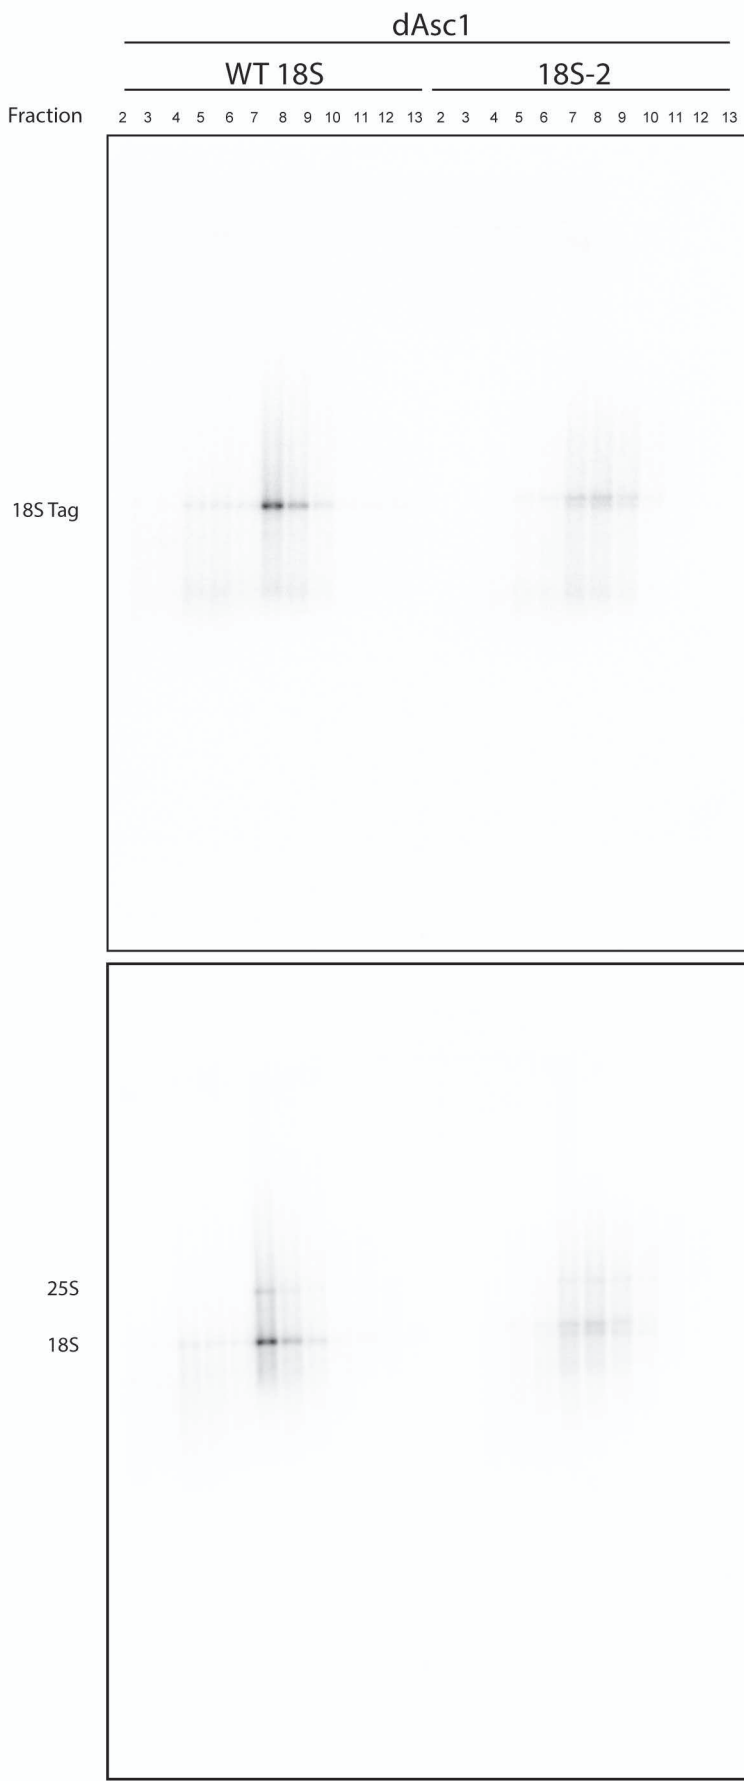



**Figure 6B**

NOY504  
WT 18S

X

NOY504  
18S-4

X

Pno1

X

Asc1

X

Rps8

X

Rps10

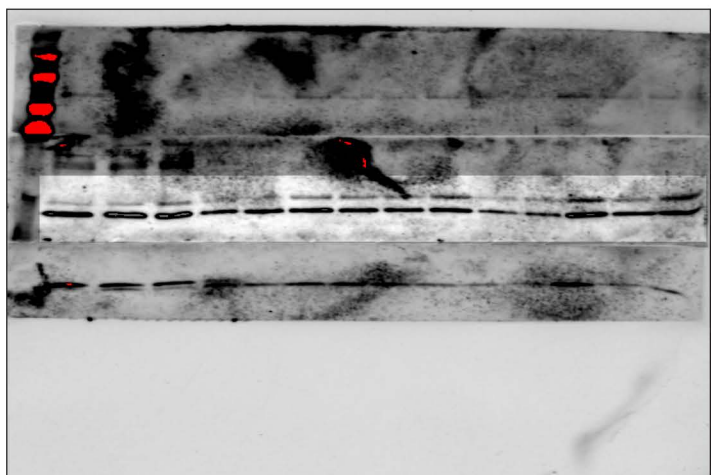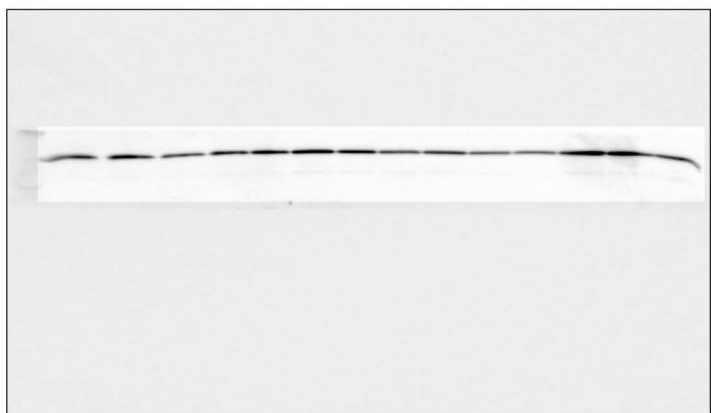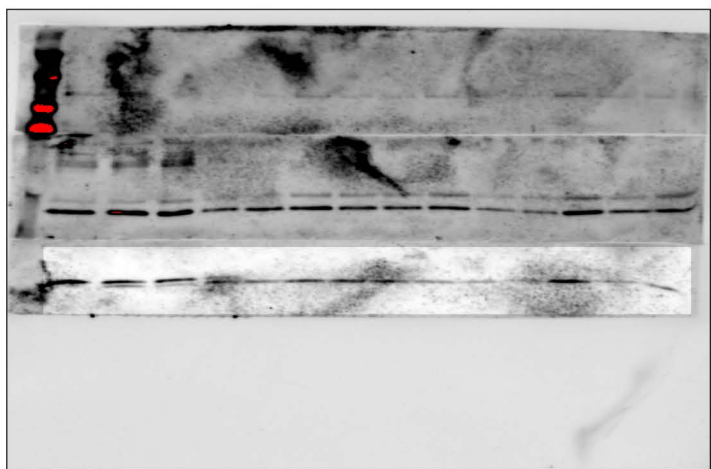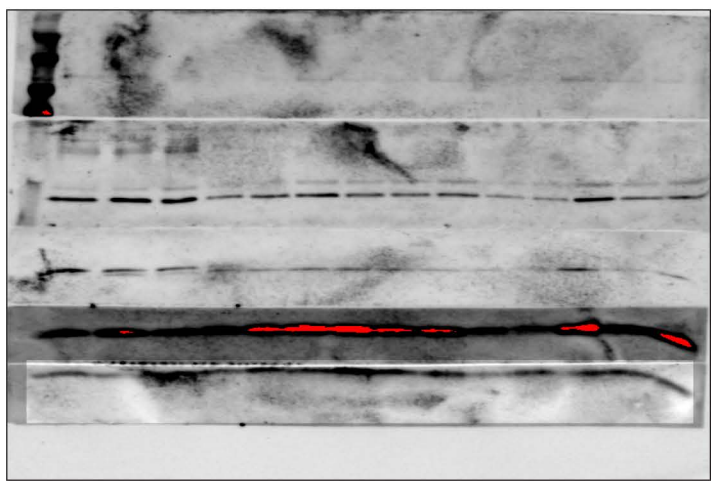

# Figure 7C

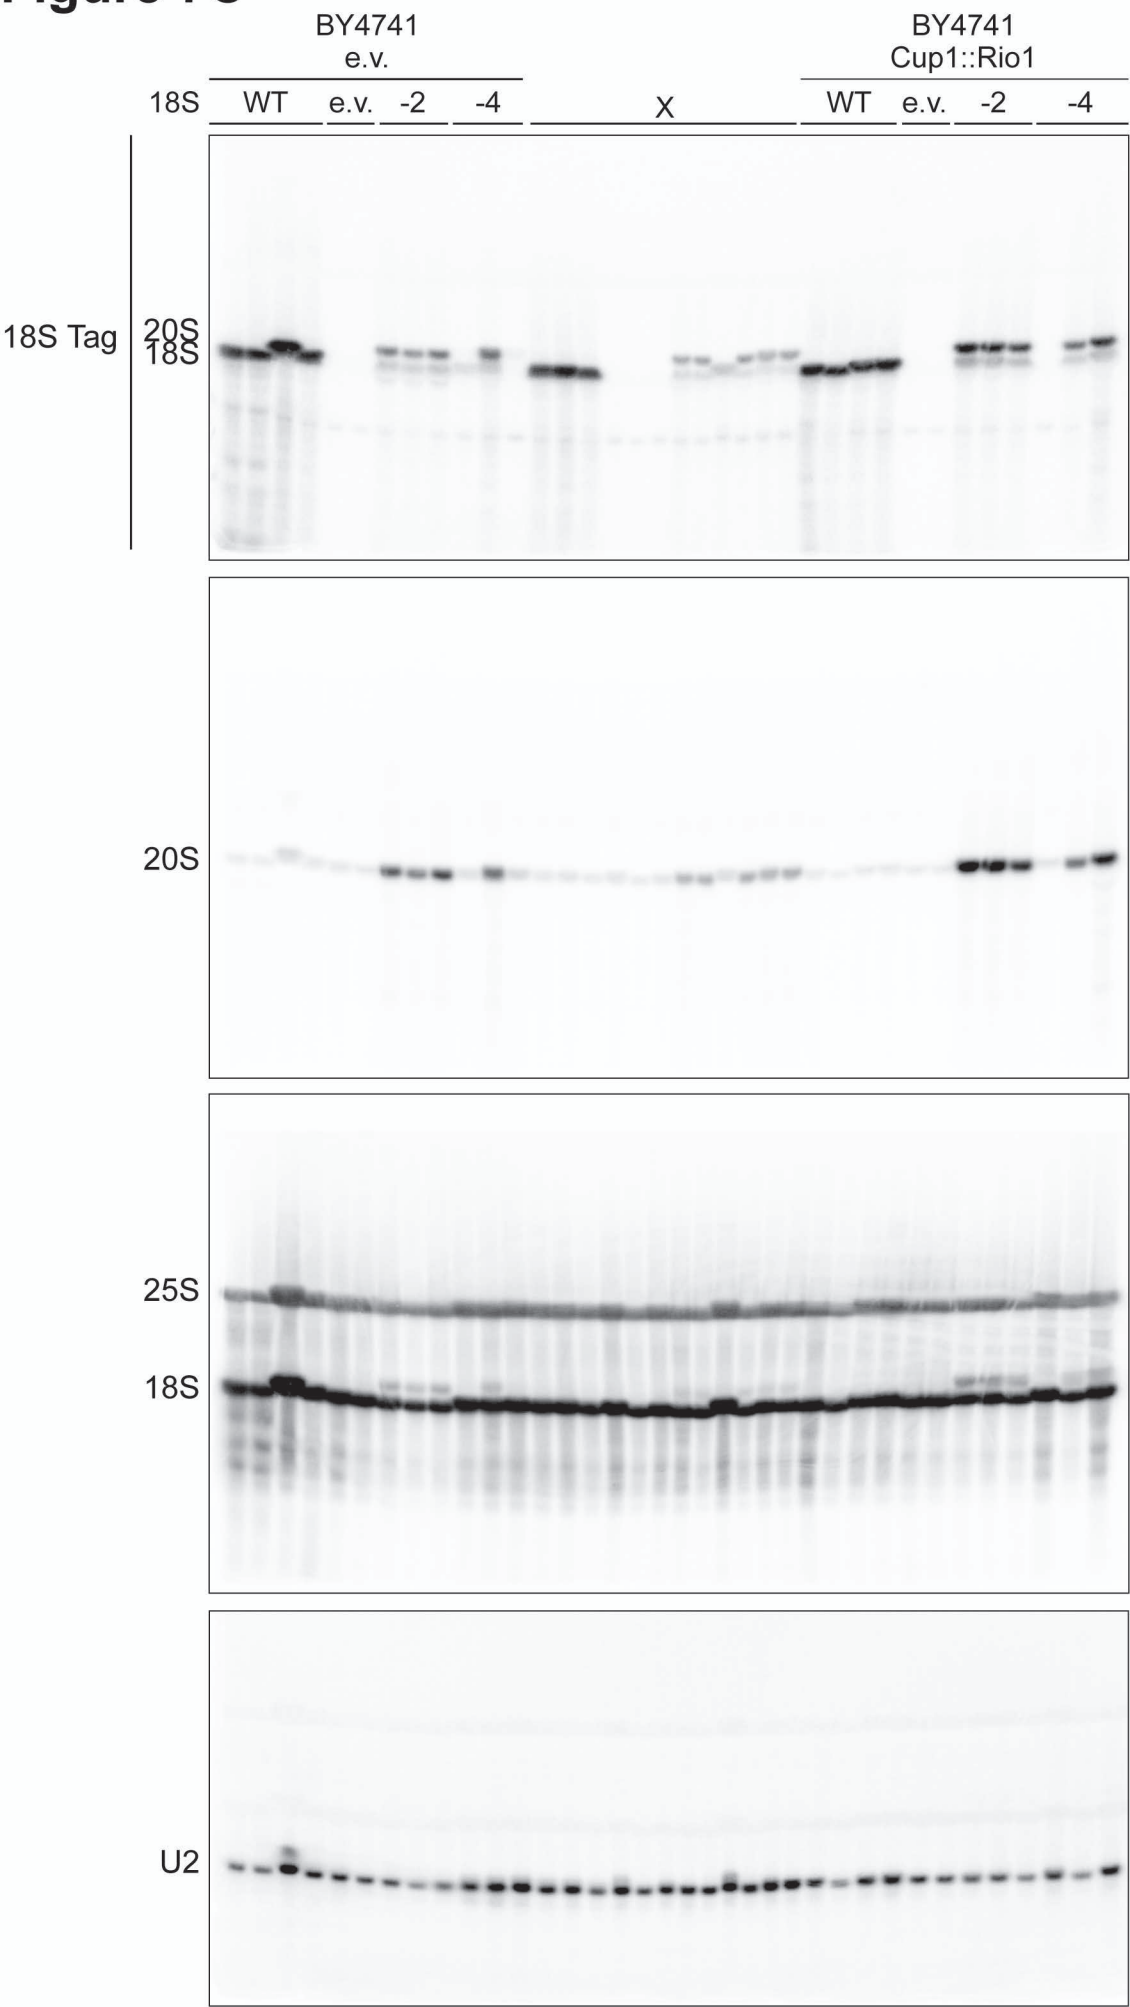



# Figure S3A

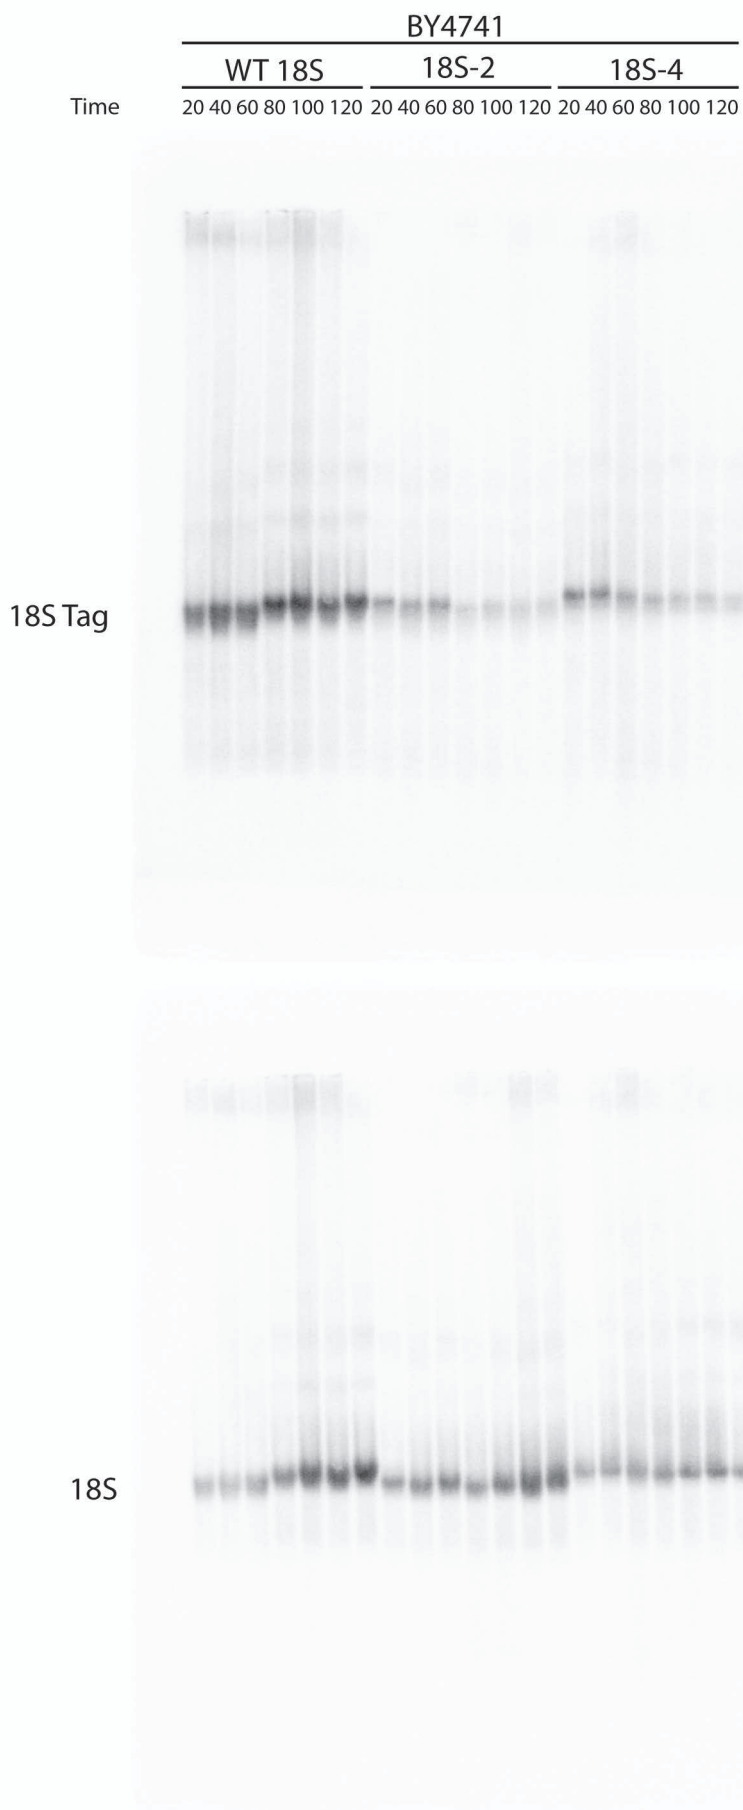

**Figure S3B**

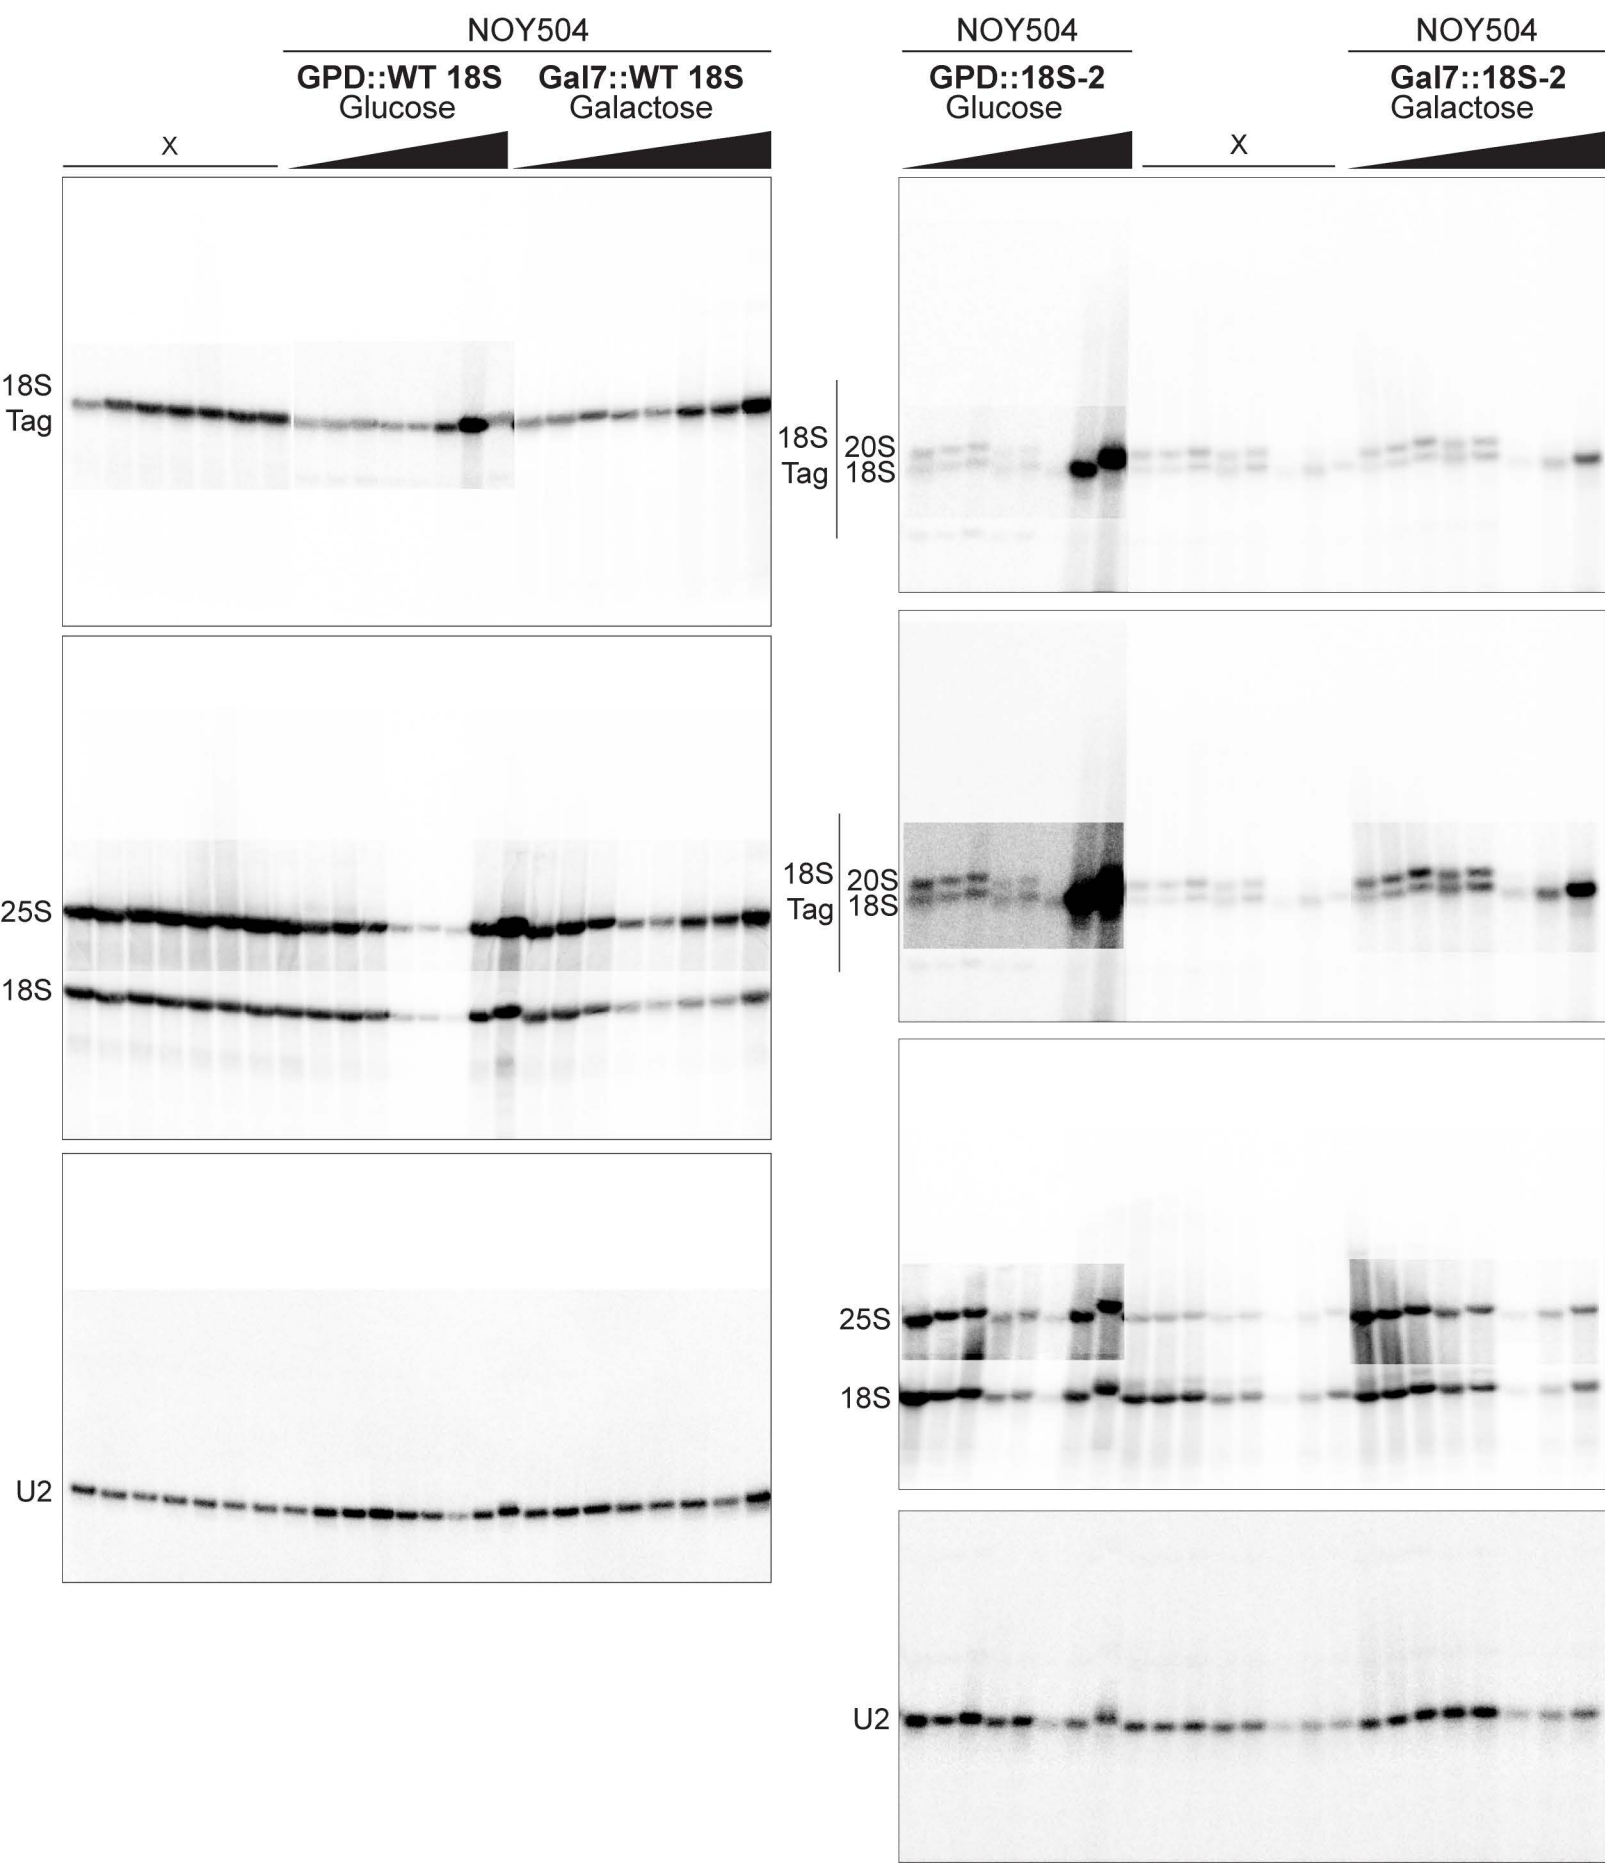

# Figure S6A

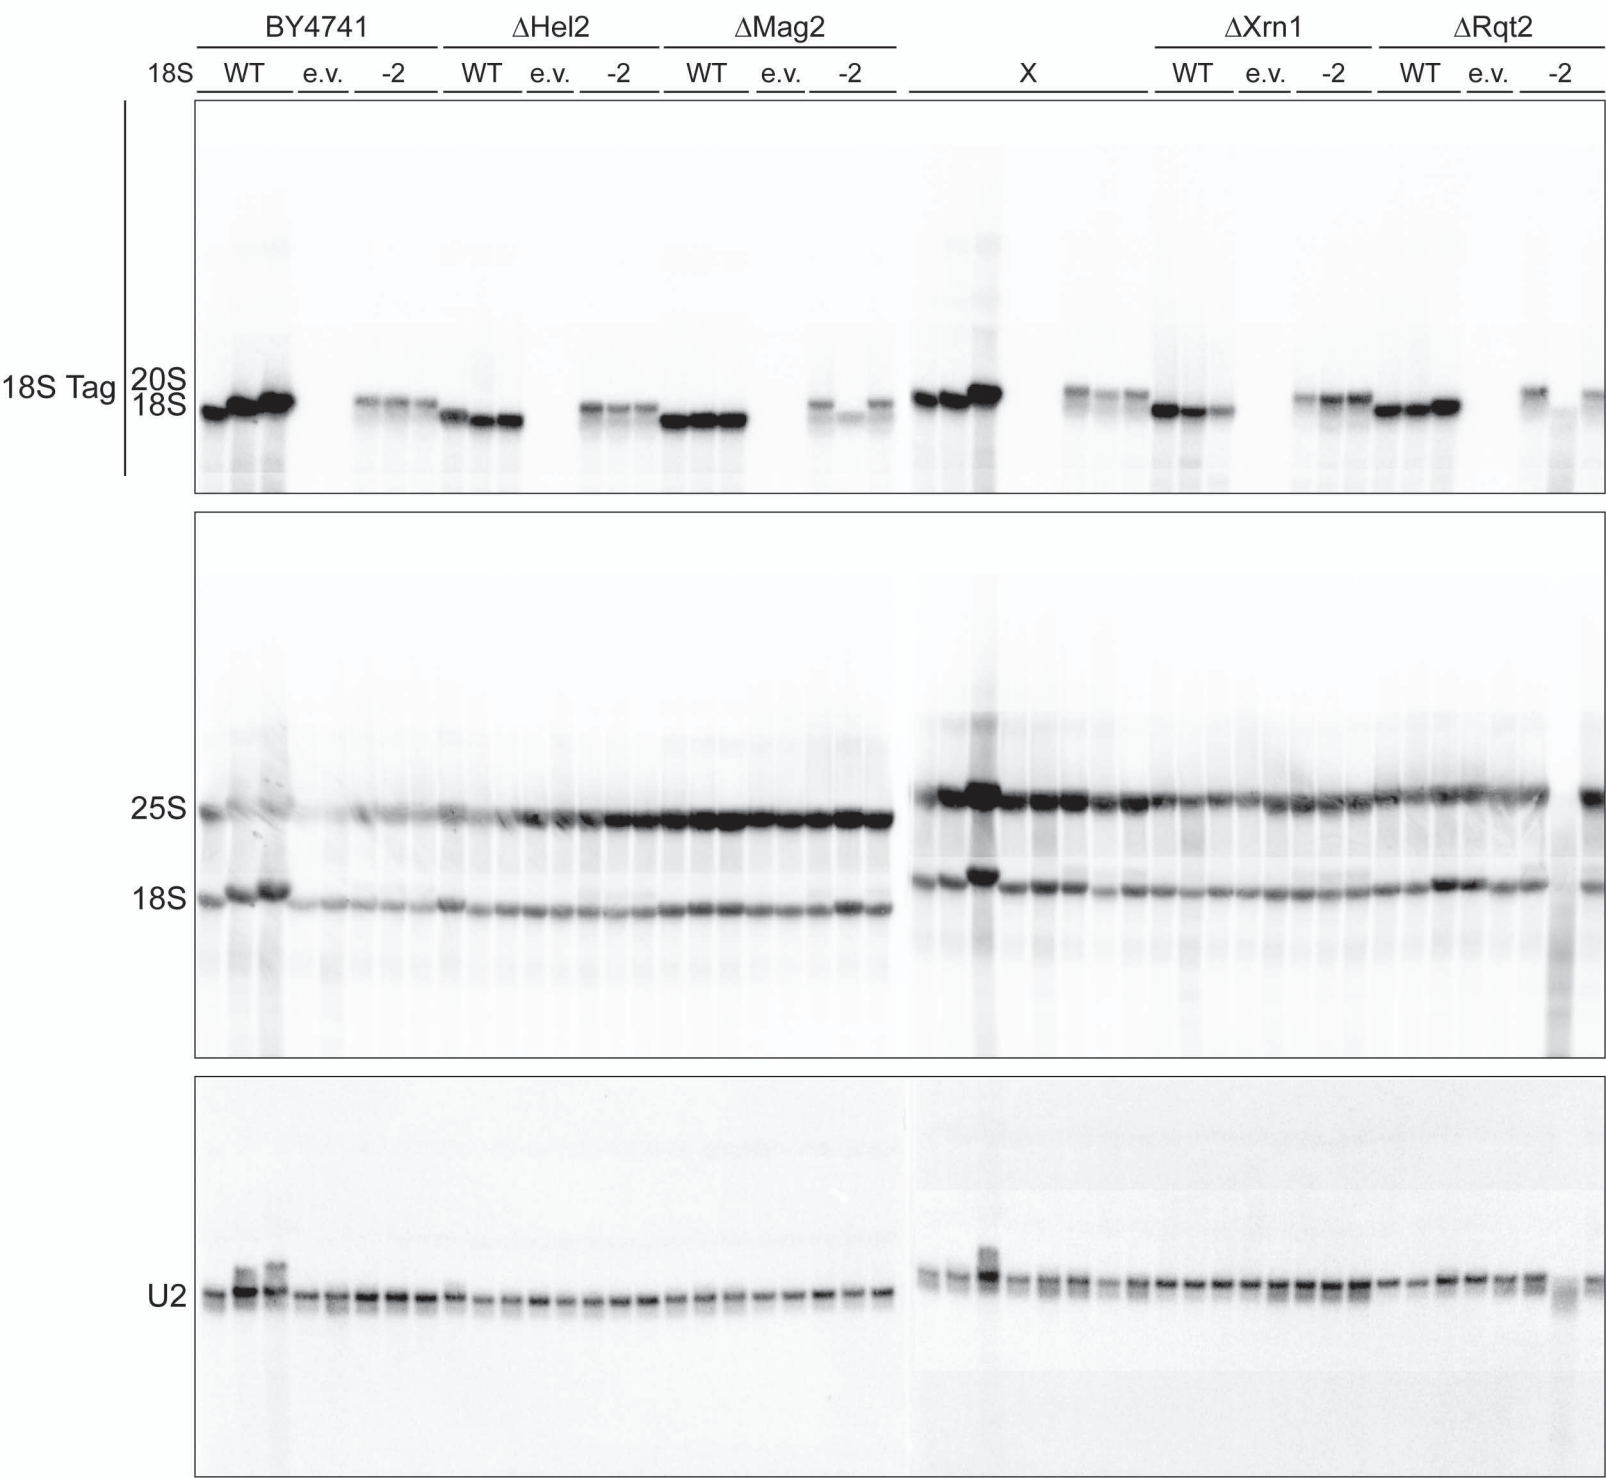

# Figure S6B

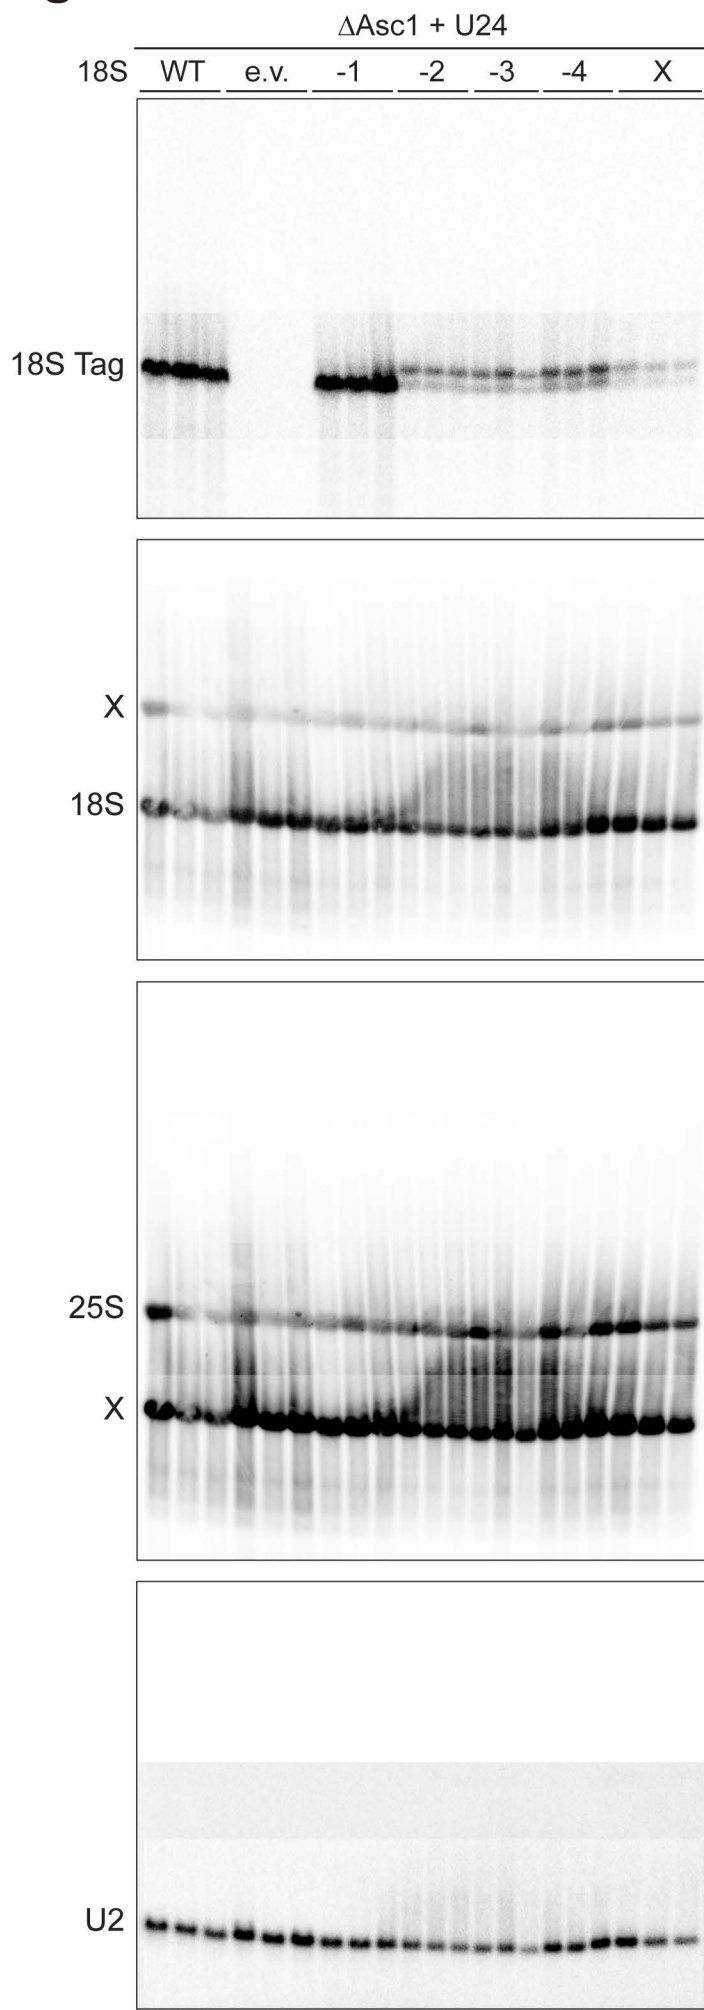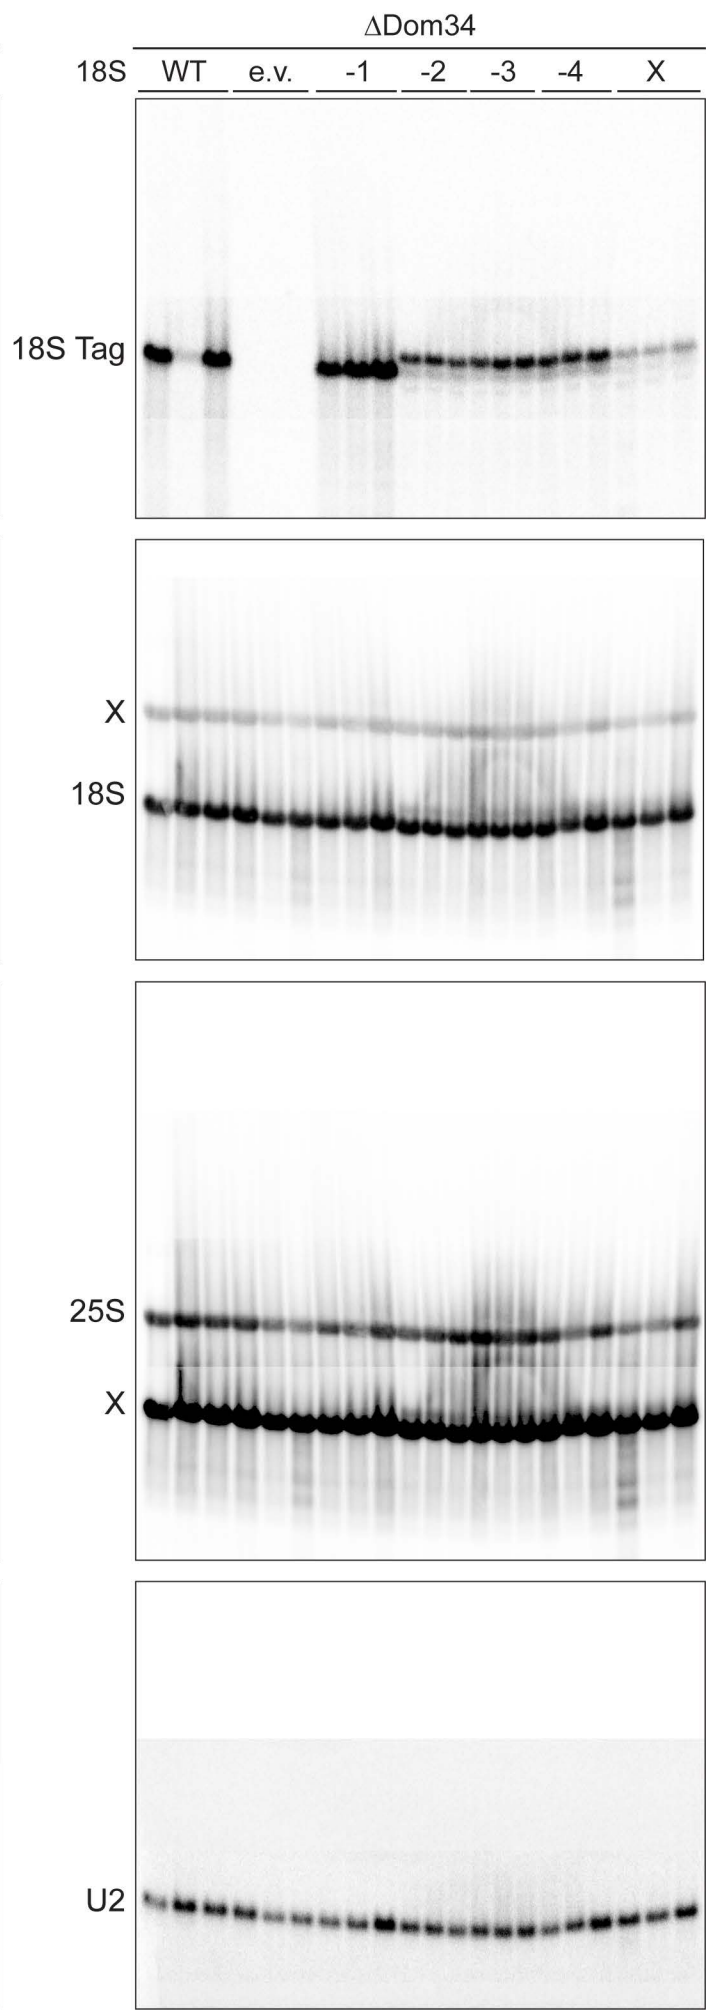

# Figure S6C

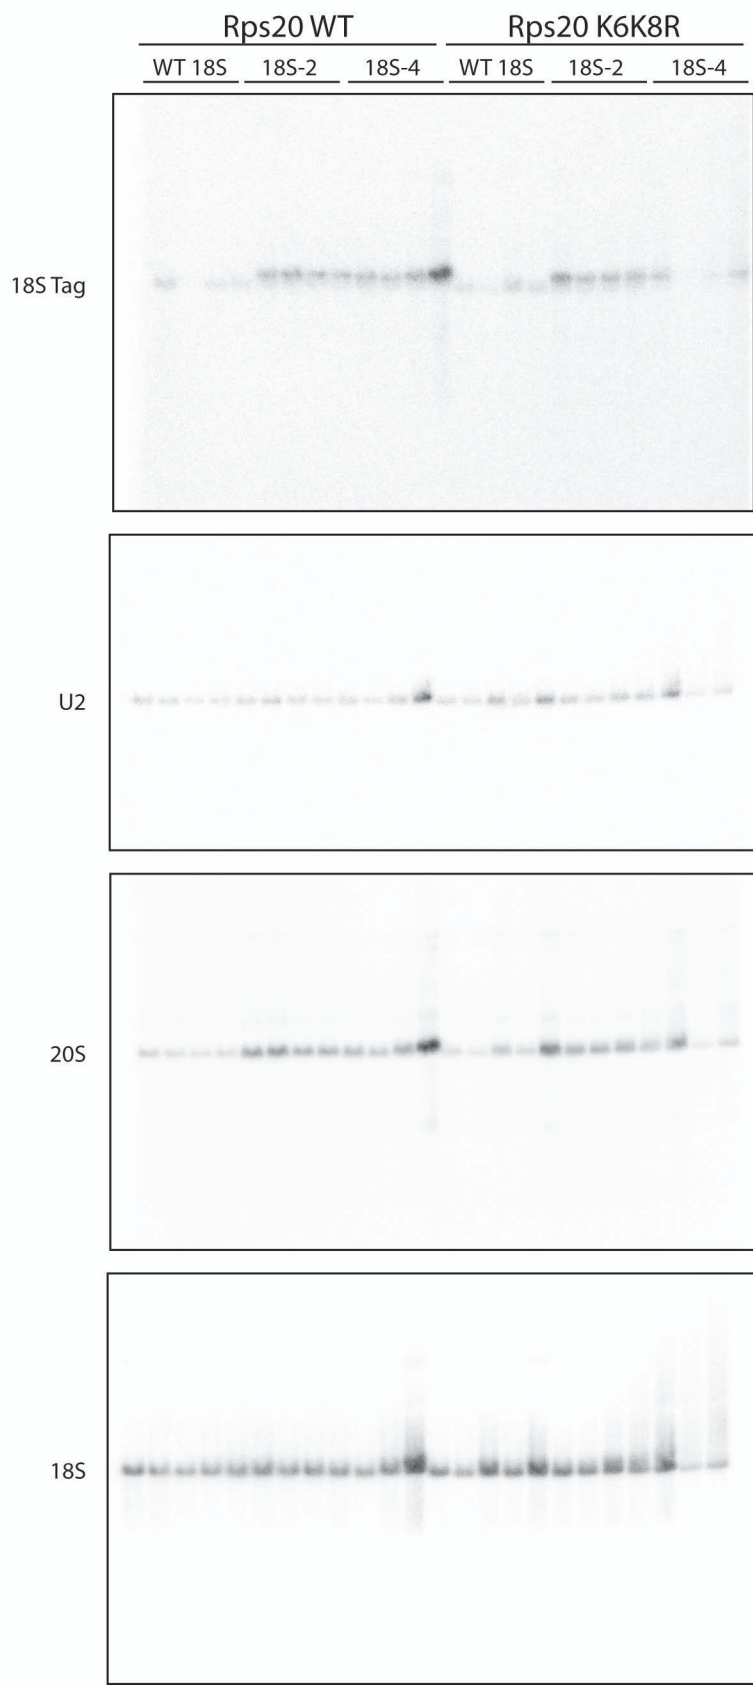

# Figure S6D

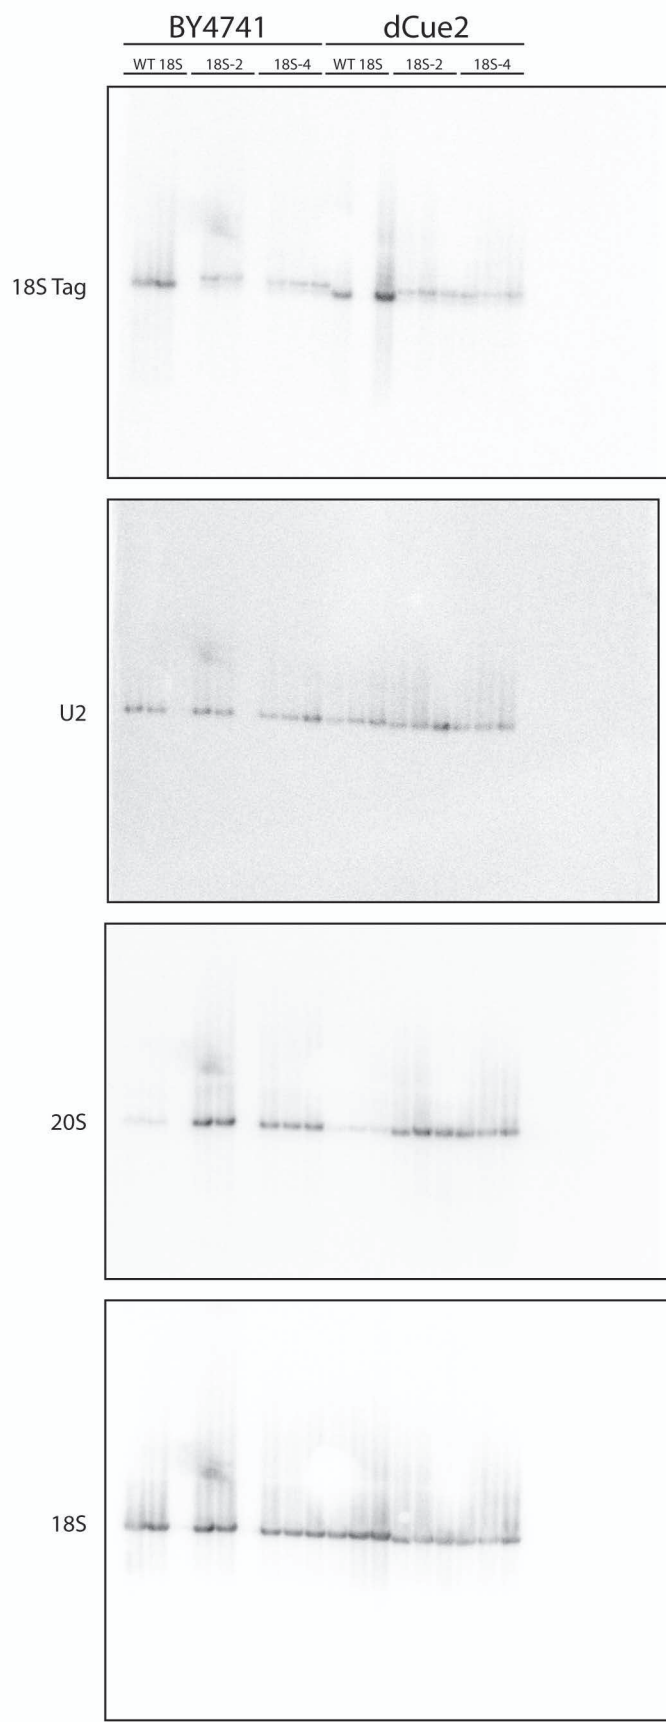

# Figure S6E

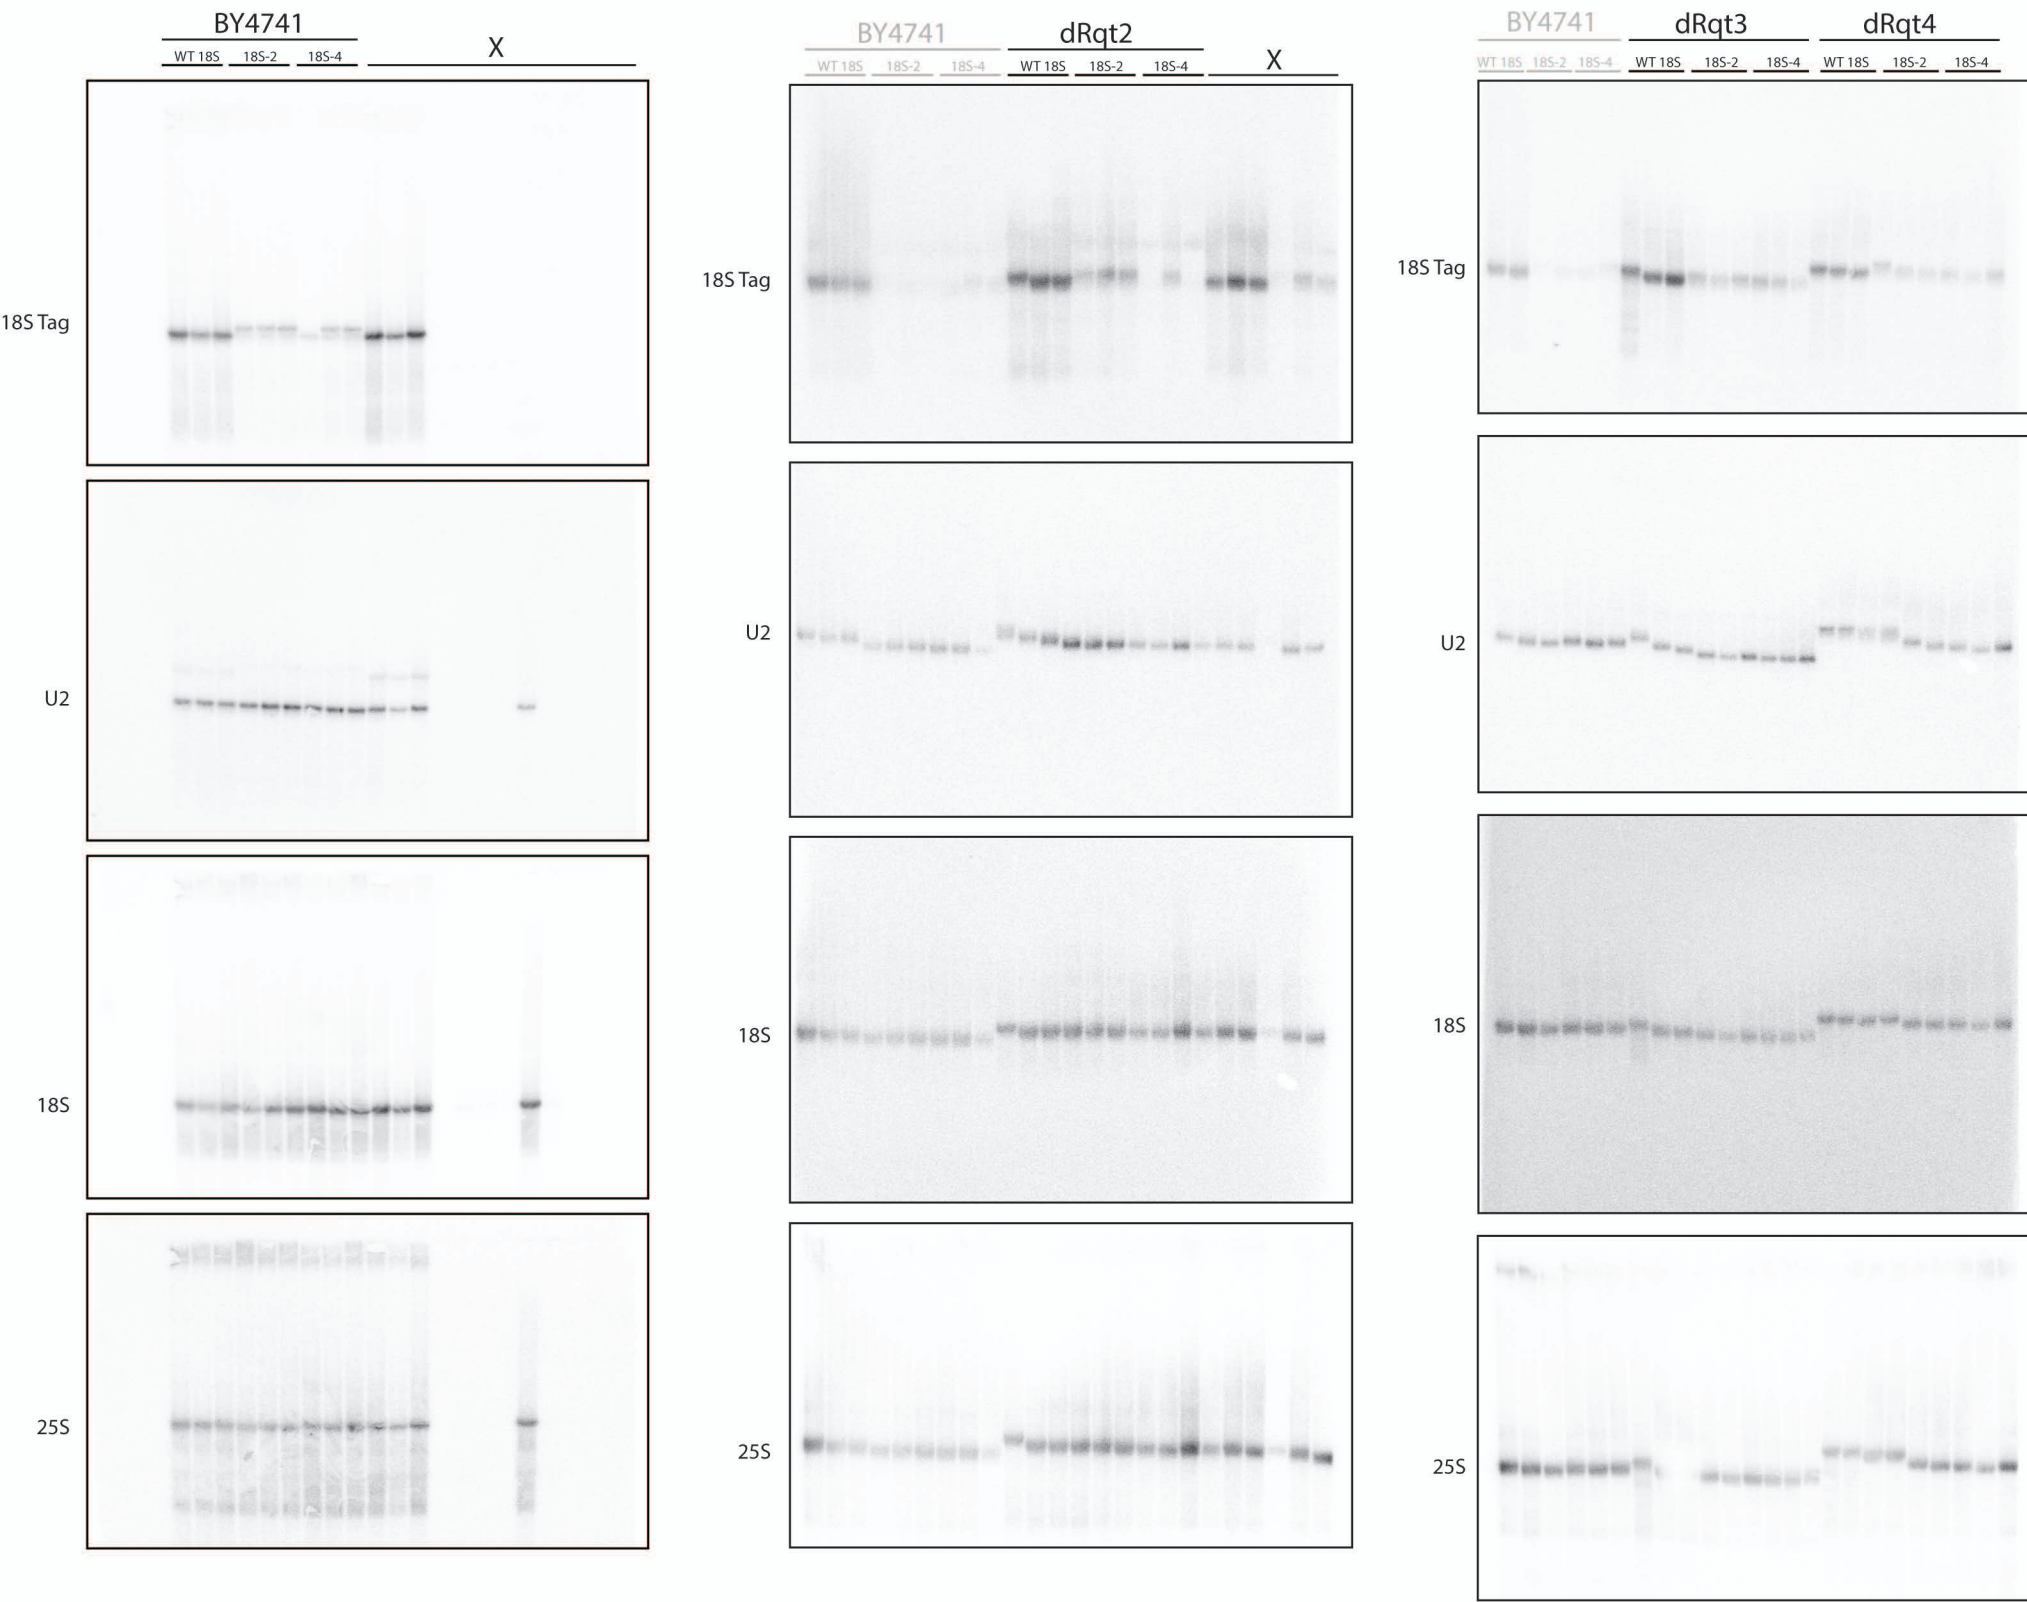

# Figure S6F

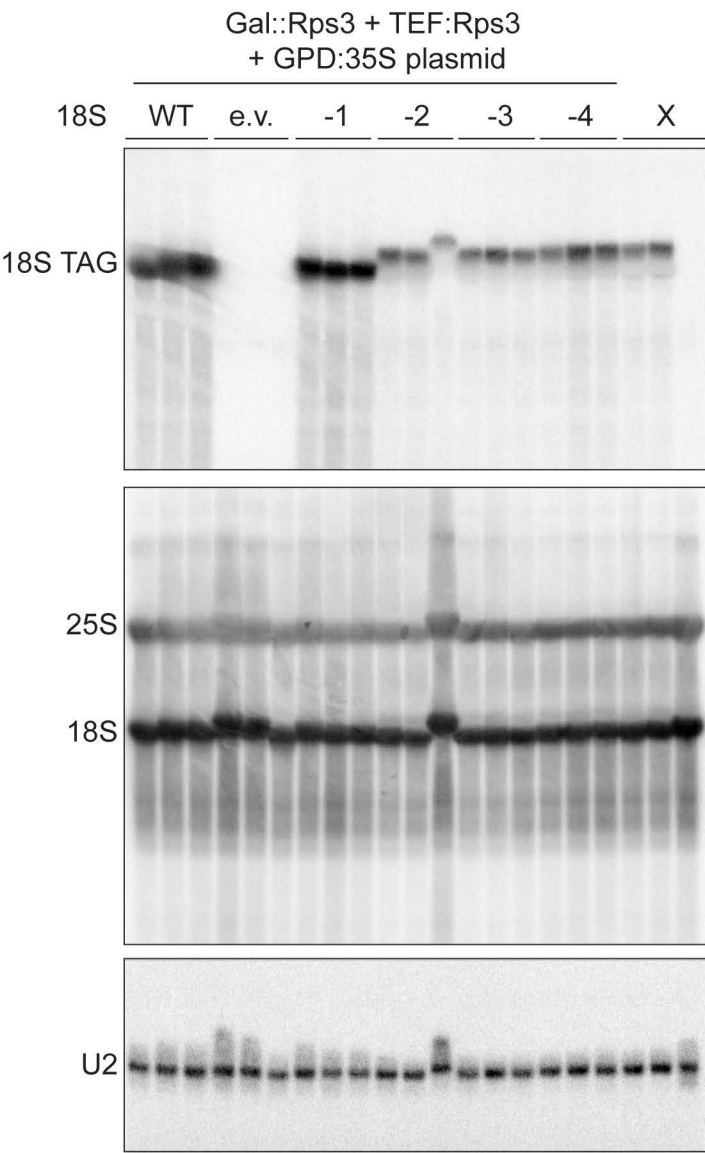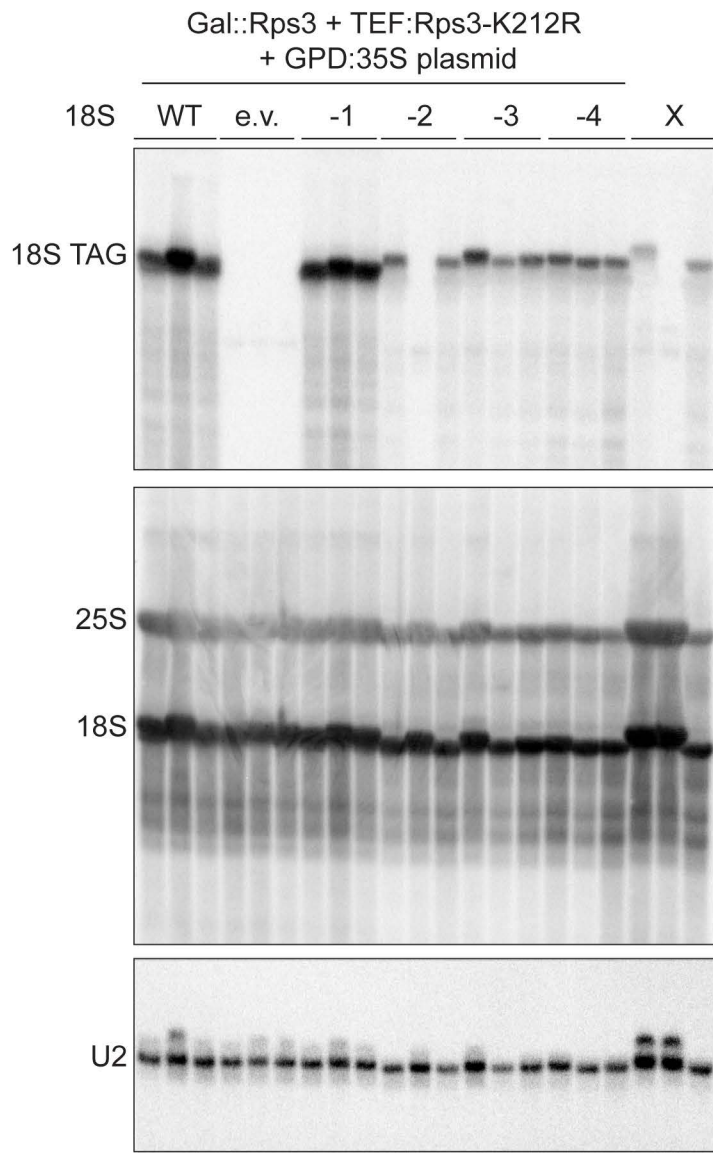



# Figure S8

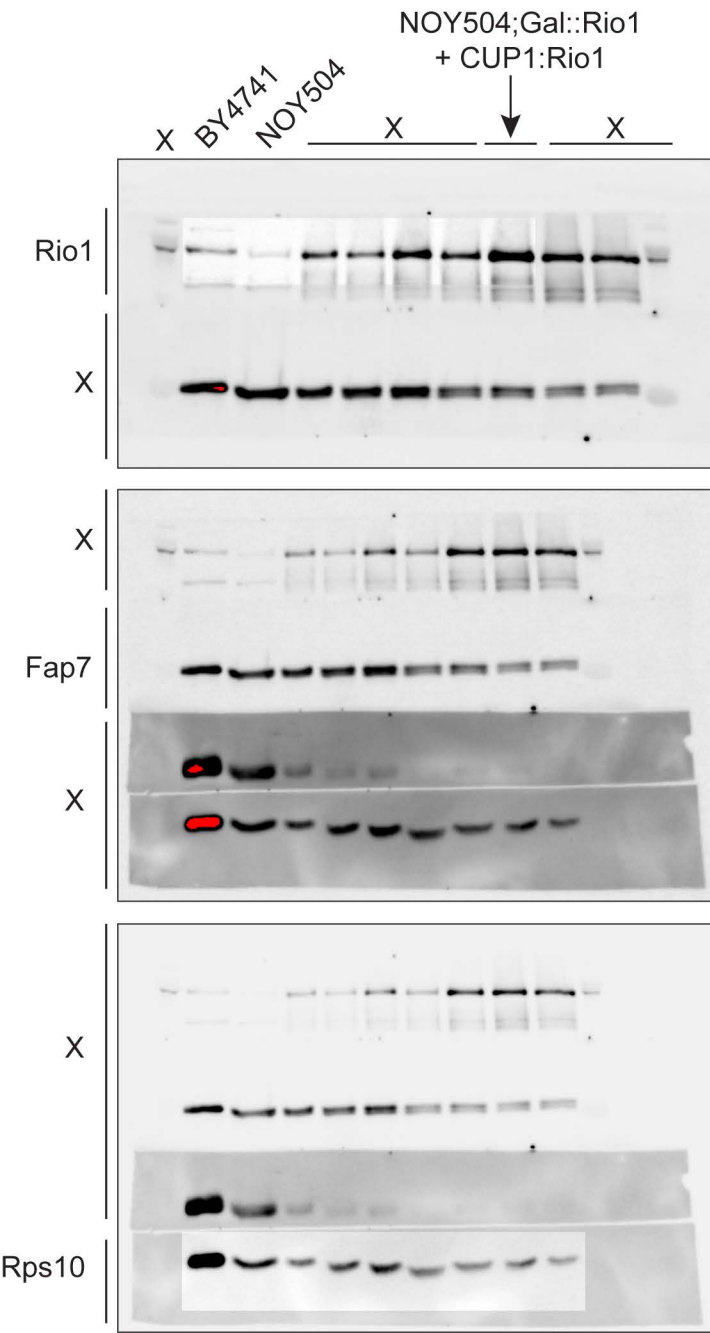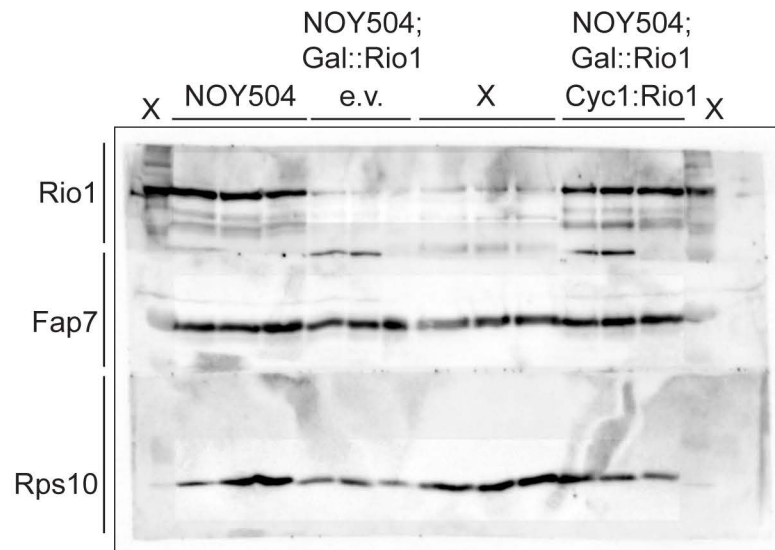

Supplement: pbio.3001767.s026.pdf [file pbio.3001767.s026.pdf]
