# Supplementary material for: The kinase Rio1 and a ribosome collision-dependent decay pathway survey the integrity of 18S rRNA cleavage
Source: PLoS Biol. 2024 Apr 25;22(4):e3001767. doi: 10.1371/journal.pbio.3001767 (PMC11045238; doi:10.1371/journal.pbio.3001767)
Supplement: S2 Data — (XLSX) [file pbio.3001767.s015.xlsx]

## Sheet: Figure 2A
Figure 2A
		Doubling Times (min)
		NOY504
	Biological Replicate	WT 18S	e.v.	18S -1	18S -2	18S -3	18S -4
	1	283.6	703.9	430.5	868.6	805.1	591.95
	2	301.45	731.6	334.75	680.15	834	557.9
	3	264.7	479.25	312.25	621.6	844.8	540.95
	4	253	515.7	302.6	636.7	317.8	529.65
	5	259.95	503.85	304	667.95	333.8	263.6
	6	382.5	535.3	279.5	295.9	437.85	249.65
	7	256.55	421.1	389.25	361.65	481.75	360.5
	8	306.8	521.85	300.65	433.5	539.85	391.45
	9	305.3	778.7	289.4	458.75	571.45	460.55
	10	356.15	534.5	335.45	432.65	498.8	480.55
	11	386.45	437.2	389.8	348.75	502.7	444.15
	12	331.45	623.6	386.1	403.25	502.55	236.7
	13	264.75	493.35	416.85	343.95	558.3	458.95
	14	244.95	498.35	345.6	278.75	564.45	299.7
	15	266		247.25	359.3	534.3	507.1
	16	278.1		202.3	314.55	691.2	487.85
	17	313.4		269.7	543.3	411.2	360.2
	18	392.95		306.05	350.85		442.25
	19	321.8		285.15	443.85
	20	289.85		300.35
	21			224.1
	Average	302.985	555.589	316.743	465.474	554.7	425.758
	Standard Error of the Mean (SEM)	10.3672	29.5315	13.1614	36.9055	38.2311	25.8336

## Sheet: Figure 2B
Figure 2B
	Condition		Biological Replicate	18S Tag	U2	18S Tag / U2	Average	Standard Error of the Mean (SEM)
	NOY504	WT 18S	1	31370.2	38058.6	0.824261	1.01446	0.139392
			2	20622.8	16035.4	1.28608
			3	30463.3	32649.3	0.933047
		e.v.	1	0	8839.36	0	0	0
			2	0	6189.53	0
			3	0	10364.6	0
		18S-1	1	19502.6	10778.9	1.80932	1.53885	0.270472
			2	16336.4	12879.7	1.26838
			3
		18S-2	1	15589.5	12781.1	1.21973	1.02458	0.195153
			2	10286.8	12402.3	0.829425
		18S-3	1	12929.5	10226.6	1.2643	1.36456	0.106803
			2	26597	16854.6	1.57803
			3	14131.8	11293.3	1.25134
		18S-4	1	30669.6	15237.4	2.01278	1.88033	0.132447
			2	28271.8	16174.9	1.74789

## Sheet: Figure 2D
Figure 2D
		NOY504
		WT 18S		18S-1		18S-2		18S-3		18S-4
	Fraction	18S Tag	25S Tag	18S Tag	25S Tag	18S Tag	25S Tag	18S Tag	25S Tag	18S Tag	25S Tag
	8	11098.5	13182.6	9765.62	11080.9	10249.5	11355.8	9533.31	11080.2	3830.45	10524.3
	9	9864.86	13394.3	9048.33	14259.8	6238.63	6529.07	13861.7	11364.6	13583.6	10044.1
	10	16180.1	19041.7	8835.09	10796.7	10801.1	13560.4	8329.89	7262.41	14648.8	12465.2
	11	23296.5	27107.6	11603.8	14371.6	10117.1	11250.4	21728.7	11623.2	20165.6	6655.8
	12	15620.2	17940.9	12980.4	15803.3	12866.1	10520.1	25716.5	11708.2	23810.3	3795.86
	13	17190.8	20719.9	5550.27	8737.79	6005.8	4345.18	17597.5	7053.77	12840.1	2348.13
		18S Tag / 25S Tag
	Fraction	WT 18S	18S-1	18S-2	18S-3	18S-4
	8	0.841902	0.881305	0.902579	0.860391	0.363961
	9	0.736497	0.634535	0.955515	1.21973	1.35239
	10	0.849722	0.818313	0.796521	1.14699	1.17518
	11	0.859409	0.807407	0.899268	1.86943	3.02977
	12	0.870645	0.821371	1.22301	2.19646	6.2727
	13	0.829677	0.635202	1.38218	2.49476	5.46823
