# Supplementary material for: The kinase Rio1 and a ribosome collision-dependent decay pathway survey the integrity of 18S rRNA cleavage
Source: PLoS Biol. 2024 Apr 25;22(4):e3001767. doi: 10.1371/journal.pbio.3001767 (PMC11045238; doi:10.1371/journal.pbio.3001767)
Supplement: S3 Data — (XLSX) [file pbio.3001767.s016.xlsx]

## Sheet: Figure 3A
Figure 3A
		Doubling Times (min)
		BY4741
	Biological Replicate	WT 18S	e.v.	18S -1	18S -2	18S -3	18S -4
	1	104.65	111.2	111.2	113.45	111.35	105.75
	2	109.15	108.55	109	112.75	107.1	110.3
	3	112.2	106.2	110.55	110.15	110.75	110.7
	4	104.1	104.95	108.5	111.85	112.1	112.95
	5	109.45	110.55	109.25	114.6	115.65	113.55
	6	107.6	109.35	111.15	116.1	114.35	115.25
	7	108.35	108.25	109.9	107.4	105.6	106.9
	8	108.3	103.85	109.25	112.55	111.95	111.3
	9	110.4	107.6	108.7	111.2	119.95	110.65
	10	107.7	106.25	107.05	108.55	111.15	107.95
	11	107.95	109.2	110.6	107.85	113.05	110.1
	12	108.45	107.05	110.25	109.25	108.3	109.5
	Average	108.192	107.75	109.617	111.308	111.775	110.408
	Standard Error of the Mean (SEM)	0.63654	0.636694	0.353571	0.791667	1.11438	0.786699

## Sheet: Figure 3B
Figure 3B
	Condition		Biological Replicate	18S Tag	U2	18S Tag / U2	Average	Standard Error of the Mean (SEM)
	BY4741	WT 18S	1	38583.3	23794.2	1.62154	1.45753	0.090339
			2	34286.1	23790.4	1.44118
			3	30032.4	22927.5	1.30988
		e.v.	1	0	21501.3	0	0	0
			2	0	22925.6	0
			3	0	20762.4	0
		18S-1	1	34616.7	24080.5	1.43754	1.35892	0.0399734
			2	30194.9	23101.8	1.30704
			3	27585.1	20706.6	1.33219
		18S-2	1	3997.89	19316.9	0.206963	0.232986	0.0131947
			2	3084.36	12734.5	0.242204
			3	3404.48	13629.2	0.249792
		18S-3	1	3317.89	12689.6	0.261464	0.253703	0.00776162
			2	3697.96	15036	0.245941
		18S-4	1	4433.57	15516.7	0.285729	0.239356	0.0235061
			2	3884.3	18543	0.209476
			3	3569.84	16018	0.222864

## Sheet: Figure 3D
Figure 3D
		18S Tag Quantification
		BY4741
	Fraction	WT 18S	18S-1	18S-2	18S-3	18S-4
	2	0	0	0	0	0
	3	445.192	0	0	0	0
	4	794.092	486.849	1994.58	238.607	393.435
	5	437.849	191.536	0	290.849	421.192
	6	24443.2	13933.8	24153.5	19620.2	30986.7
	7	5129.73	4915.25	2643.48	7976.17	5009.42
	8	13134.5	3404.93	2867.6	1451.41	2406.28
	9	9767.5	7631.53	1226.34	1528.75	1096.85
	10	9236.79	8105.07	2554.53	1230.21	1320.68
	11	11051.6	7624.77	2715.77	1738.21	1922.34
	12	8878.38	13254.2	3904.72	622.678	1344.8
	13	2435.13	6111.63	877.092	631.607	611.849
	Percent 18S Tag in polysomes (fractions 8-13)	63.5585	70.2596	32.9456	20.3881	19.1213
