# Supplementary material for: The kinase Rio1 and a ribosome collision-dependent decay pathway survey the integrity of 18S rRNA cleavage
Source: PLoS Biol. 2024 Apr 25;22(4):e3001767. doi: 10.1371/journal.pbio.3001767 (PMC11045238; doi:10.1371/journal.pbio.3001767)
Supplement: S4 Data — (XLSX) [file pbio.3001767.s017.xlsx]

## Sheet: Figure 4A
Figure 4A
				Polysome / Monosome Area						Average Polysome / Monosome Area at Each Timepoint					WT 18S	18S-4
		Biological Replicate	Time (min)	18S WT	18S-4				Average Time Per Timepoint (min)	18S WT	18S-4			Exponential growth equation: Y=1*exp(-k*X)
		1	0	1					0	1				Best-fit values
			1.13	1.22078					1.245	1.05204				k	0.07377	-0.00414
			2.78	0.954703					2.74	0.856809				Tau	13.56	-241.8
			4.95	0.69987					5.055	0.617531				Doubling Time	9.396	-167.6
			0		1				0		1			95% CI (profile likelihood)
			1.36		1.13691				1.33		1.09177			k	0.02476 to 0.1350	-0.02217 to 0.01557
			2.8		1.02934				2.865		1.02748			Tau	7.405 to 40.38	???
			5.68		0.905126				5.42		0.993714			Doubling Time	5.133 to 27.99	???
		2	0	1										Goodness of Fit
			1.36	0.883301										Degrees of Freedom	7	7
			2.7	0.758914										R squared	0.5511	-0.1567
			5.16	0.535191										Sum of Squares	0.1421	0.03682
			0		1									Sy.x	0.1425	0.07253
			1.3		1.04663
			2.93		1.02562									Number of points
			5.16		1.0823									# of X values	8	16
														# Y values analyzed	8	8

## Sheet: Figure 4C
Figure 4C
		Condition		Biological Replicate	Monosome	Disome	Di / (Mono + Di)	Average		Unpaired t test
		dAsc1	WT 18S	1	918377792	121677135	0.116991	0.1114		P value	<0.0001
				2	189238871	21403773	0.101612			P value summary	****
				3	283454027	37094408	0.115722			Significantly different (P < 0.05)?	Yes
			18S-2	1	211206287	94080750	0.308171	0.2971		One- or two-tailed P value?	Two-tailed
				2	84240155	34288694	0.289286			t, df	t=24.68, df=4
				3	62809847	26144891	0.293912
										Difference between means	0.1857 ± 0.007522
										95% confidence interval	0.1648 to 0.2066
										R squared (eta squared)	0.9935

## Sheet: Figure 4D
Figure 4D
			HA Mbf1
			WT 18S		18S-2
		Replicates	Free	Bound	Free	Bound
		1	0.734872	0.265128	0.459031	0.540969
		2	0.558466	0.441534	0.204148	0.795852
		3	0.951948	0.048052	0.741086	0.258914
		4	0.877034	0.122966	0.588647	0.411353
		5	0.758965	0.241035	0.617001	0.382999
		Average	0.776257	0.223743	0.521983	0.478017
		SEM	0.067256	0.067256	0.091231	0.091231
