# Supplementary material for: The kinase Rio1 and a ribosome collision-dependent decay pathway survey the integrity of 18S rRNA cleavage
Source: PLoS Biol. 2024 Apr 25;22(4):e3001767. doi: 10.1371/journal.pbio.3001767 (PMC11045238; doi:10.1371/journal.pbio.3001767)
Supplement: S5 Data — (XLSX) [file pbio.3001767.s018.xlsx]

## Sheet: Figure 5A
Figure 5A (Left)
									18S Tag/U2
	Condition		Biological Replicate	Technical Replicate	18S Tag	U2	18S Tag/U2	Average Technical Replicates 18S Tag/U2	Average Cell Background + WT 18S	18S -2 relative to WT 18S by Cell Background	Average	Standard Error of the Mean (SEM)
	BY4741	WT 18S (Gel 1)	1	1	28253.9	34689.7	0.814473	1.11292	1.36409
				2	27891.7	19762.3	1.41136
			2	1	36407.2	32731.8	1.11229	1.32889
				2	34315.1	22203.4	1.54549
			3	1	38354	23269	1.64829	1.65046
				2	44366.5	26845.9	1.65263
		18S -2 (Gel 1)	1	1	4018.43	33287.7	0.120718	0.176737		0.129564	0.164247	0.0117341
				2	7090.81	30464.7	0.232755
			2	1	4741.5	33381.8	0.142039	0.221798		0.162598
				2	5868.91	19462	0.301557
			3	1	4840.5	29531.3	0.163911	0.204092		0.149618
				2	7659.23	31355.2	0.244273
		WT 18S (Gel 2)	4	1	47960.8	20187.6	2.37576	2.37576	2.36992
			5	1	42720.7	18070.8	2.36408	2.36408
		18S -2 (Gel 2)	4	1	9152.35	19911.6	0.459649	0.459649		0.193952
			5	1	9497.23	21603	0.439624	0.439624		0.185502
	∆Hel2	WT 18S	1	1	20804.9	28166.1	0.738652	0.738652	0.991147
			2	1	21007.3	19098	1.09997	1.09997
			3	1	23549.8	20752.1	1.13481	1.13481
		18S -2	1	1	7730.76	20363.1	0.379645	0.379645		0.383037	0.320314	0.0313711
			2	1	6971.86	24228.2	0.287758	0.287758		0.290328
			3	1	7446.28	26124.3	0.285033	0.285033		0.287579
	∆Xrn1	WT 18S	1	1	22923.2	23733.2	0.965872	0.965872	0.689855
			2	1	17322.1	26146.8	0.662493	0.662493
			3	1	11722.5	26569.7	0.441199	0.441199
		18S -2	1	1	3692.43	32307.4	0.11429	0.11429		0.165673	0.275725	0.0552241
			2	1	7137.05	32064.9	0.222582	0.222582		0.32265
			3	1	9495.61	40621.6	0.233758	0.233758		0.338851
Figure 5A (Middle)
							18S Tag/U2
	Condition		Biological Replicate	18S Tag	U2	18S Tag/U2	Average Cell Background + WT 18S	18S -2 relative to WT 18S by Cell Background	Average	Standard Error of the Mean (SEM)
	BY4741	WT 18S (Gel 1)	1	44297	26290.8	1.68488	1.66622
			2	43062.8	24700.1	1.74343
			3	36557.2	23279.7	1.57035
		18S -2 (Gel 1)	1	4264.48	19722.6	0.216223		0.129769	0.129148	0.00527367
			2	2897.89	14527.3	0.199479		0.119719
			3	3337.43	14519	0.229865		0.137956
		WT 18S (Gel 2)	4	46005.8	37644.9	1.2221	0.925201
			5	21527.2	31614.2	0.680934
			6	28307.7	32441.6	0.872573
		18S -2 (Gel 2)	4	7737.55	36609.5	0.211354		0.228441	0.196838	0.019476
			5	6944.01	37385.7	0.18574		0.200756
			6	6589.08	44148	0.14925		0.161316
	∆Asc1 + U24	WT 18S (Gel 1)	1	34184.4	32600.1	1.0486	1.13724
			2	35368.3	28780.2	1.22891
			3	31016.5	27346	1.13422
		18S -2 (Gel 1)	1	8440.42	19904.4	0.424049		0.372874	0.381094	0.0180992
			2	6529.42	16187.9	0.403352		0.354675
			3	6708.73	14189.6	0.472792		0.415734
		WT 18S (Gel 2)	4	30331.7	50600.8	0.599432	0.676244
			5	40138.9	50752.3	0.790877
			6	28553.8	44725.6	0.638422
		18S -2 (Gel 2)	4	9556.98	55683.7	0.17163		0.253799	0.250145	0.0034899
			5	8615.45	52392.4	0.164441		0.243168
			6	8512.57	49663	0.171407		0.253469
	∆Dom34	WT 18S (Gel 1)	1	38227.2	24810.8	1.54075	1.25832
			2	31498.2	32276.3	0.975892
		18S -2 (Gel 1)	1	7042.76	26150.6	0.269315		0.214028	0.181543	0.0177106
			2	5050.2	26219.4	0.192613		0.153072
			3	5025.1	22494.8	0.22339		0.17753
		WT 18S (Gel 2)	3	37163.7	37735.6	0.984845	1.00553
			4	31651.8	31991.1	0.989393
			5	41479.7	39794.2	1.04236
		18S -2 (Gel 2)	4	7006.2	41599.9	0.168419		0.167492	0.196741	0.0147086
			5	6118.67	29164.5	0.209799		0.208645
			6	6648.84	30885.9	0.215271		0.214086
	Condition		Biological Replicate	18S Tag	U2	18S Tag/U2	18S Tag / U2 relative to WT 18S	Average	Standard Error of the Mean (SEM)
	BY4741	18S WT	1	13600587	23793507	0.571609	0.410899	1	0.589101
			2	31985113	14468785	2.21063	1.5891
			3		1117270
		18S-2	1	13527254	21800982	0.620488	0.446035	0.347969	0.098067
			2	5615773	16153824	0.347644	0.249902
			3		-2233203
	dCue2	18S WT	1	30219292	9487632	3.18512	1.01953	1	0.019533
			2		12942747
			3	62834279	20513427	3.06308	0.980467
		18S-2	1	1593464	13640306	0.11682	0.0373932	0.127305	0.068144
			2	15660575	19209021	0.815272	0.260962
			3	9584771	36715660	0.261054	0.0835613
Figure 5A (Right)
	Condition		Biological Replicate	18S Tag	U2	18S Tag/U2	18S Tag / U2 relative to WT 18S	Average	Standard Error of the Mean (SEM)
	Rps20 WT	18S WT	1	10990731	7036409	1.56198	0.909628	1	0.208215
			2		6038628
			3	7634598	3182044	2.39927	1.39723
			4	4835429	4062574	1.19024	0.693141
		18S-2	1	23609684	7271757	3.24676	1.89077	1.95751	0.087341
			2	27491301	8439365	3.25751	1.89703
			3	19389431	6180273	3.13731	1.82703
			4	18780013	4937087	3.80386	2.2152
	Rps20 K6K8R	18S WT	1		6397246			1	0.258943
			2	2891145	5869423	0.492577	0.491431
			3	16454169	14035478	1.17233	1.1696
			4	8495406	6329957	1.3421	1.33897
		18S-2	1	38011281	18632269	2.04008	2.03533	2.41365	0.299469
			2	20297503	8901531	2.28023	2.27492
			3	22108903	6690702	3.30442	3.29673
			4	19938216	9714579	2.0524	2.04762

## Sheet: Figure 5B
Figure 5B (Left)
									18S Tag/U2
	Condition		Biological Replicate	Technical Replicate	18S Tag	U2	18S Tag/U2	Average Technical Replicates 18S Tag/U2	Average Cell Background + WT 18S	18S -2 relative to WT 18S by Cell Background	Average	Standard Error of the Mean (SEM)
	BY4741	WT 18S (Gel 1)	1	1	28253.9	34689.7	0.814473	1.11292	1.36409
				2	27891.7	19762.3	1.41136
			2	1	36407.2	32731.8	1.11229	1.32889
				2	34315.1	22203.4	1.54549
			3	1	38354	23269	1.64829	1.65046
				2	44366.5	26845.9	1.65263
		18S -2 (Gel 1)	1	1	4018.43	33287.7	0.120718	0.176737		0.129564	0.164247	0.0117341
				2	7090.81	30464.7	0.232755
			2	1	4741.5	33381.8	0.142039	0.221798		0.162598
				2	5868.91	19462	0.301557
			3	1	4840.5	29531.3	0.163911	0.204092		0.149618
				2	7659.23	31355.2	0.244273
		WT 18S (Gel 2)	4	1	47960.8	20187.6	2.37576	2.37576	2.36992
			5	1	42720.7	18070.8	2.36408	2.36408
		18S -2 (Gel 2)	4	1	9152.35	19911.6	0.459649	0.459649		0.193952
			5	1	9497.23	21603	0.439624	0.439624		0.185502
	∆Mag2	WT 18S (Gel 1)	1	1	27197.3	22469	1.21044	1.21044	1.09561
			2	1	29423.8	26981.3	1.09052	1.09052
			3	1	27094	27482.8	0.985856	0.985856
		18S -2 (Gel 1)	1	1	7430.74	28203.8	0.263466	0.263466		0.240475	0.260152	0.0175485
			2	1	7489.98	26934.3	0.278083	0.278083		0.253817
		WT 18S (Gel 2)	1	1	25562.3	19372.2	1.31953	1.31953	1.37605
			2	1	28337.2	19780.7	1.43257	1.43257
		18S -2 (Gel 2)	1	1	9463.1	22081.8	0.428547	0.428547		0.311432
			2	1	8519.33	26358.2	0.323214	0.323214		0.234885
Figure 5B (Middle)
	Condition		Biological Replicate	18S Tag	U2	18S Tag/U2	Average	Standard Error of the Mean (SEM)
	Rps3	WT 18S	1	57443.7	16130.5	3.56118	3.68046	0.38235
			2	65782.1	14970	4.39425
			3	53584.6	17364	3.08596
		18S -2	1	5992.69	16787.3	0.35698	0.24403	0.06368
			2	4663.31	19551.6	0.23851
			3	2058.7	15072.3	0.13659
	Rps3- K212R	WT 18S	1	42952.7	13690.5	3.13741	3.36769	0.48828
			2	61930.3	14386.7	4.3047
			3	38106.2	14320.4	2.66097
		18S -2	1	3047.84	14385.3	0.21187	0.1885	0.02337
			2	2103.53	12738.2	0.16514
Figure 5B (Right)
	Condition		Biological Replicate	18S Tag	U2	18S Tag/U2	18S Tag / U2 relative to WT 18S	Average	Standard Error of the Mean (SEM)
	BY4741	18S WT	1	43084190	21163173	2.03581	1.27508	1	0.057973
			2	23436532	20350862	1.15162	0.72129
			3	33113355	20664677	1.60241	1.00363
			4	24773531	16036933	1.54478	1.03983
			5	14349235	8813664	1.62807	1.09589
			6	17248907	13434005	1.28397	0.864276
			7	18804949	8098874	2.32192	1.18894
			8	32478307	17329095	1.87421	0.959692
			9	46053853	27699117	1.66265	0.851362
		18S-2	1	9472916	25441882	0.372335	0.233203	0.075598	0.039343
			2	9169582	33890270	0.270567	0.169463
			3	11894686	35667892	0.333484	0.20887
			4	-691750	7426912	-0.093141	-0.0627
			5	1953845	13750594	0.142092	0.095646
			6	1223624	16399424	0.0746139	0.050224
			7	-5867984	28238120	-0.207804	-0.10641
			8	6395536	34110695	0.187494	0.096007
			9	-237277	30898687	-0.00767919	-0.00393
	dRqt2	18S WT	1					1	0.153517
			2
			3
			4	39934259	12997334	3.0725	1.43765
			5	42980424	19314805	2.22526	1.04122
			6	37521013	33688758	1.11375	0.521135
			7	41674479	19393377	2.1489	1.03714
			8	43844242	15591616	2.81204	1.3572
			9	42649678	33986710	1.25489	0.605659
		18S-2	1					0.193463	0.038025
			2
			3
			4	7051115	50105506	0.140725	0.065847
			5	24921652	42480493	0.586661	0.274504
			6	17718582	41866068	0.423221	0.198029
			7	8853735	46314569	0.191165	0.092264
			8	16573621	30389635	0.545371	0.263217
			9	22207950	40155773	0.553045	0.266921
	dRqt3	18S WT	1	55854428	40865709	1.36678	0.875047	1	0.055319
			2	38965237	22033846	1.76843	1.13219
			3	54283518	35007087	1.55064	0.992761
			4	31012605	25180969	1.23159	0.8874
			5	34986333	28856532	1.21242	0.87359
			6	47887161	27848254	1.71957	1.23901
			7	25488706	4191931	6.08042	0.750746
			8	29290975	3042329	9.62781	1.18874
			9	39459801	4594073	8.58928	1.06051
		18S-2	1					0.204012	0.02745
			2
			3
			4	10075929	28983386	0.347645	0.25049
			5	6189717	14769987	0.419074	0.301956
			6	11668272	36250909	0.321875	0.231922
			7	13757341	11483155	1.19805	0.147922
			8	6116080	5525965	1.10679	0.136655
			9	11332815	9020018	1.25641	0.155128
	dRqt4	18S WT	1	10909562	16703489	0.653131	0.698476	1	0.076101
			2	14454521	18023878	0.801965	0.857644
			3	24000849	17776545	1.35014	1.44388
			4	29083167	29501736	0.985812	0.861051
			5	25491708	25041978	1.01796	0.88913
			6	21897056	15302895	1.43091	1.24982
			7	33095907	6002585	5.51361	0.947304
			8	30889034	5565568	5.55002	0.953561
			9	32134364	5023108	6.39731	1.09913
		18S-2	1					0.237826	0.021133
			2
			3
			4	7977228	24653828	0.32357	0.28262
			5	7422986	27617947	0.268774	0.234759
			6	4071914	24036415	0.169406	0.147967
			7	12259343	7888669	1.55404	0.267004
			8	11250655	9050932	1.24304	0.213569
			9	9603295	5870907	1.63574	0.28104

## Sheet: Figure 5C
Figure 5C (Left)
			Doubling Time (min)								Average Doubling Time (min) per day						Fold Change in Doubling Time relative to WT 18S
			BY4741		∆Hel2		∆Xrn1				BY4741	∆Hel2	∆Xrn1				BY4741	∆Hel2	∆Xrn1
	Day Grown On	Biological Replicate	WT 18S	18S -2	WT 18S	18S -2	WT 18S	18S -2		Day Grown On	WT 18S	WT 18S	WT 18S		Day Grown On	Biological Replicate	18S -2	18S -2	18S -2
	1	1	108.75	115.35	126.25	142	174.35	165.75		1	109.7	125.225	171.325		1	1	1.0515	1.13396	0.96746
		2	110.8	116.15	126.05	135.85	173.35	178.45		2	111.567	126.2	179.233			2	1.0588	1.08485	1.04159
		3	109.55	114.65	126.75	134.15	168.4	176		3	108.525	116.35	160.5			3	1.04512	1.07127	1.02729
		4			121.85	133.4	169.2									4		1.06528
	2	1	111.65	117.75	121.7	132.4	169.4	180							2	1	1.05542	1.04913	1.00428
		2	110.5	116.15	127.9	142.05	184.95	164.75								2	1.04108	1.12559	0.919193
		3	112.55	116.5	129	142.4	183.35									3	1.04422	1.12837
	3	1	108.7	113.35	111.3	141.8	159.65	142.4							3	1	1.04446	1.21874	0.887227
		2	108.35	113.2	121.4	140	161.35	158.6								2	1.04308	1.20327	0.988162
		3				132.75		165.65								3		1.14095	1.03209
		4														4
		5														5
		6														6
		7														7
																Average	1.04796	1.12214	0.98341
																Standard Error of the Mean (SEM)	0.0022801	0.0179501	0.0197153
Figure 5C (Middle)
			Doubling Times (min)			Doubling Times Normalized to WT 18S per day
			BY4741			BY4741
	Day Grown On	Biological Replicate	WT 18S	18S -2		18S -2
	1	1	104.65	113.45		1.0486
		2	109.15	112.75		1.04213
		3	112.2	110.15		1.0181
		4	104.1	111.85		1.03381
		5	109.45	114.6		1.05923
		6	107.6	116.1		1.0731
		7	108.35	107.4		0.992683
		8	108.3	112.55		1.04028
		9	110.4	111.2		1.02781
		10	107.7	108.55		1.00331
		11	107.95	107.85		0.996842
		12	108.45	109.25		1.00978
		Daily Average	108.192
	2	1	116.35	120.65		1.03953
		2	115.25	120		1.03393
		3	115.15	120.6		1.0391
		4	117.5	120.8		1.04082
		Daily Average	116.062
					Average	1.03119
					Standard Error of the Mean (SEM)	0.00554072
			Doubling Times (min)			Doubling Times Normalized to WT 18S per day
			∆Asc1 + U24			∆Asc1 + U24
	Day Grown On	Biological Replicate	WT 18S	18S -2		18S -2
	1	1	123.95	127.7		1.02454
		2	126	134.9		1.0823
		3	123.5	129.95		1.04259
		4	126.2	132.55		1.06345
		5	125.5	130.95		1.05061
		6	122.7	134.7		1.0807
		Daily Average	124.642
	2	1	137.5	145.8		1.06663
		2	139.15	145.9		1.06737
		3	138.55	145.75		1.06627
		4	133.7	156.15		1.14235
		5	134.85	162.75		1.19064
		6	136.4	150.05		1.09773
		Daily Average	136.692
	3	1	131.3	132.85		0.997466
		2	134.05	136.2		1.02262
		3	135.25	135.65		1.01849
		4	132.15	135.35		1.01624
		Daily Average	133.188
	4	1	131.15	135.45		1.0534
		2	124	138.65		1.07829
		3	130.6	133.4		1.03746
		Daily Average	128.583
					Average	1.06311
					Standard Error of the Mean (SEM)	0.0104913
			Doubling Times (min)			Doubling Times Normalized to WT 18S per day				Doubling Times (min)		Doubling Times Normalized to WT 18S per day	Doubling Times Normalized to BY4741	Doubling Times (min)		Doubling Times Normalized to WT 18S per day	Doubling Times Normalized to BY4741
			∆Dom34			∆Dom34				BY4741				dCue2
	Day Grown On	Biological Replicate	WT 18S	18S -2		18S -2		Day Grown On	Biological Replicate	WT 18S	18S -2	18S -2		WT 18S	18S -2	18S -2
	1	1	107.2	118.3		1.06529		1	1	110.8	129.9	1.12451	0.958381	131.2	141.9	1.14729	0.977788
		2	110.35	127.6		1.14903			2	111.6	137.4	1.18944	1.01371	131.3	144.4	1.1675	0.995015
		3	114.6	125.7		1.13192			3	117.1	142.2	1.23099	1.04913	110.1
		4	107.2	125.15		1.12697			4	120.2	137.4	1.18944	1.01371	108.5
		5	116.3	122.25		1.10086			5	112.2	128.6	1.11326	0.948789	134.7
		6	110.65	126.8		1.14183			6	121.2	140.7	1.21801	1.03806	126.3
		Daily Average	111.05						Daily Average	115.517				123.683
	2	1	124.55	127.6		1.02938		2	1	126.6	147	1.17757	1.0036	130.3	156	1.24023	1.057
		2	124.5	128.9		1.03987			2		148.1	1.18638	1.01111	123.3	154.1	1.22512	1.04413
		3	124.3	128.2		1.03422			3	123.3	146.6	1.17437	1.00087	111.8	161.1	1.28077	1.09156
		4	125.05	127.5		1.02857			4	124.6	141	1.12951	0.962636	109.1	148.8	1.18299	1.00822
		5	122.5	128		1.03261			5					140.1	147.2	1.17027	0.997374
		6	122.85	129.6		1.04551			6					140.1	138.6	1.1019	0.939104
		Daily Average	123.958						Daily Average	124.833				125.783
	3	1	124.55	129.25		1.0436						Average	1				1.01377
		2	125.25	134.6		1.0868						Standard Error of the Mean (SEM)	0.010607				0.017093
		3	121.75	132.4		1.06904
		Daily Average	123.85
					Average	1.07503
					Standard Error of the Mean (SEM)	0.0114669
Figure 5C (Right)
			Doubling Times (min)		Doubling Times Normalized to WT 18S per day	Doubling Times Normalized to Rps20 WT	Doubling Times (min)		Doubling Times Normalized to WT 18S per day	Doubling Times Normalized to Rps20 WT
			Rps20 WT				Rps20 K6K8R
	Day Grown On	Biological Replicate	WT 18S	18S -2	18S -2	18S -2	WT 18S	18S -2	18S -2	18S -2
	1	1	105.5	158.6	1.33516	1.01044	133.3	142.8	1.03154	0.780667
		2	107	153.2	1.2897	0.976038	143.7	153.6	1.10956	0.839709
		3					123.9	140.9	1.01782	0.77028
		4	135.6	145.1	1.22151	0.924432	129.9	144.2	1.04166	0.788321
		5	110.4	155.5	1.30906	0.990691	148.8	143.8	1.03877	0.786134
		6	109.1	164.7	1.38651	1.0493	151	148.3	1.07127	0.810735
		Daily Average				0.990181				0.795975
	2	1	98.47	150.6	1.41512	1.07096
		2	99.06	145.1	1.36344	1.03185
		3	104.7	148.9	1.39915	1.05887	134	129.8	0.962016	0.728049
		4	114.2	150.9	1.41794	1.07309	127	126	0.933852	0.706735
		5	115.3				136.4	129.3	0.95831	0.725245
		6	106.8				142.3	122.1	0.904947	0.68486
		Daily Average				1.05869				0.711222
	3	1	137.6	155.4	1.23382	0.933752	112.9	117.4	0.994494	0.752629
		2	111.2	154.2	1.22429	0.926541	109.7	121.3	1.02753	0.777631
		3	139.9	160.4	1.27352	0.963795	118.9	132.3	1.12071	0.84815
		4	120.3	164.8	1.30846	0.990234	124.4	132	1.11817	0.846226
		5	119.5				118.7	138	1.169	0.884691
		6	127.2				123.7	137.9	1.16815	0.88405
		Daily Average				0.95358				0.832229
				Average		1				0.788382
				Standard Error of the Mean (SEM)		0.01497				0.015176

## Sheet: Figure 5D
Figure 5D (Left)
			Doubling Time (min)						Average Doubling Time (min) per day					Fold Change in Doubling Time relative to WT 18S
			BY4741		∆Mag2				BY4741	∆Mag2				BY4741	∆Mag2
	Day Grown On	Biological Replicate	WT 18S	18S -2	WT 18S	18S -2		Day Grown On	WT 18S	WT 18S		Day Grown On	Biological Replicate	18S -2	18S -2
	1	1	108.75	115.35	132.95	142.45		1	109.7	137.612		1	1	1.0515	1.03515
		2	110.8	116.15	138.1	150.1		2	111.567	126.45			2	1.0588	1.09074
		3	109.55	114.65	139.4	145.65		3	108.525	119.95			3	1.04512	1.05841
		4			140								4
	2	1	111.65	117.75	129.95	146.8						2	1	1.05542	1.16093
		2	110.5	116.15	122.95								2	1.04108
		3	112.55	116.5									3	1.04422
	3	1	108.7	113.35	118.55	125.8						3	1	1.04446	1.04877
		2	108.35	113.2	121.35	126.15							2	1.04308	1.05169
		3				123.75							3		1.03168
		4				127.1							4		1.05961
		5				125.35							5		1.04502
		6				124.85							6		1.04085
		7				125.25							7		1.04419
													Average	1.04796	1.06064
													Standard Error of the Mean (SEM)	0.0022801	0.0111138
Figure 5D (Middle)
			Doubling Times (min)		Doubling Times Normalized to WT 18S per day	Doubling Times (min)		Doubling Times Normalized to WT 18S per day
			Rps3			Rps3-K212R
	Day Grown On	Biological Replicate	WT 18S	18S -2	18S -2	WT 18S	18S -2	18S -2
	1	1	65.16	57.245	0.941375	62.405	66.075	0.993012
		2	59.26	69.195	1.13789	61.145	72.415	1.08829
		3	58.01	66.005	1.08543	76.07	66.61	1.00105
		Daily Average			1.0549			1.02745
	2	1	74.52	71.4	1.00138	78.895	72.815	0.982808
		2	70.06	73.895	1.03638	70.885	83.28	1.12406
		3	67.965	72.125	1.01155	72.025	83.33	1.12473
		4	72.66			74.55
		Daily Average			1.02397			1.1244
	3	1	95.6	92.205	0.976076	106.95	105.9	1.00793
		2	93.33	95.74	1.0135	105.6	102.7	0.977475
		3		84.275	0.892129	102.65	110.2	1.04886
		Daily Average			0.960567			1.01142
				Average	0.909571			0.934822
				Standard Error of the Mean (SEM)	0.024318			0.019921
Figure 5D (Right)
			Doubling Times (min)		Doubling Times Normalized to WT 18S per day	Doubling Times Normalized to BY4741	Doubling Times (min)		Doubling Times Normalized to WT 18S per day	Doubling Times Normalized to BY4741	Doubling Times (min)		Doubling Times Normalized to WT 18S per day	Doubling Times Normalized to BY4741	Doubling Times (min)		Doubling Times Normalized to WT 18S per day	Doubling Times Normalized to BY4741
			BY4741				dRqt2				dRqt3				dRqt4
	Day Grown On	Biological Replicate	WT 18S	18S -2	18S -2	18S -2	WT 18S	18S -2	18S -2	18S -2	WT 18S	18S -2	18S -2	18S -2	WT 18S	18S -2	18S -2	18S -2
	1	1	131.9	150.2	1.11369	0.998552	132.9	165.9	1.20145	1.07723	140.1	143	0.979676	0.87839		173.6	1.15888	1.03907
		2	137.1	153.1	1.13519	1.01783	136	169.7	1.22897	1.10191	137.9
		3	134.2	140.5	1.04177	0.934065	139.2	169.3	1.22607	1.09931	151	136.8	0.9372	0.840306
		4	134.1	152.1	1.12778	1.01118	142.3	166.3	1.20434	1.07983	149.1
		5	133.5	131.7	0.97652	0.875561	141.1	163.2	1.18189	1.0597	150.7
		6	138.4	137.7	1.02101	0.915449	137	159	1.15148	1.03243	147				149.8
		Daily Average	134.867				138.083				145.967				149.8
	2	1	127.3	148.9	1.17183	1.05067	128.1	170.6	1.27155	1.14009	148.4				129	152.6	1.12828	1.01163
		2	134.2	150.1	1.18127	1.05914	123.5	172.8	1.28795	1.15479	133.7	147.9	1.03066	0.924105	133.9	162.2	1.19926	1.07527
		3	129.4	171.3	1.34811	1.20873	139.4	167.8	1.25068	1.12138	147.2	147.7	1.02927	0.922855	146.2	143.3	1.05952	0.949979
		4	122.2	156.7	1.23321	1.10571	138.8	164	1.22236	1.09598	155	143.8	1.00209	0.898488	131.9	160.1	1.18373	1.06135
		5	121.8	133.8	1.05299	0.944125	134.1	148	1.10311	0.989059	141.2				137.5	159.6	1.18004	1.05804
		6	127.5	136.6	1.07503	0.963882	141.1	161.2	1.20149	1.07727	135.5	158.1	1.10174	0.987836	133	153.9	1.13789	1.02025
		Daily Average	127.067				134.167				143.5				135.25
	3	1	116.8	125.6	1.08541	0.973193	116.4	145.1	1.20495	1.08037	124.8	144.2	1.13063	1.01373	127.7	149.8	1.17875	1.05689
		2	114.2	134.7	1.16405	1.0437		143.5	1.19166	1.06846	127.6	149	1.16826	1.04748	124.5	154.5	1.21574	1.09005
		3	117.2	132.3	1.14331	1.02511	123.7	149.4	1.24066	1.11239	128.6	151.3	1.18629	1.06365	128.2	147.2	1.1583	1.03854
		4	114.9	134	1.158	1.03828	123.7	141.1	1.17173	1.05059	128.7	151.8	1.19022	1.06716	125.6	152.4	1.19921	1.07523
		5	118.2	118.5	1.02405	0.918179	115.7	140.7	1.16841	1.04761		151.1	1.18473	1.06224	128.4	140.9	1.10872	0.994094
		6	113	118.3	1.02232	0.91663	122.6	134.1	1.1136	0.99847	128	148.1	1.1612	1.04115	128.1	138.5	1.08984	0.977161
		Daily Average	115.717				120.42				127.54				127.083
	4	1	105.9				131.2	127.7	0.962176	0.8627		139.1	1.09506	0.981845	142.1	161	1.12195	1.00596
		2	104				133.3	123.7	0.932037	0.835676	133.7	143.1	1.12655	1.01008	141	161	1.12195	1.00596
		3	101.1				130.9	143.7	1.08273	0.970791	122.1	149.5	1.17693	1.05525	154.2	166.3	1.15888	1.03907
		4	105.9				128.9	132.4	0.997589	0.894451	117.5	146.7	1.15489	1.03549	141.9	163.8	1.14146	1.02345
		5	122					156.1	1.17616	1.05456		147.7	1.16276	1.04255	138.3	147.3	1.02648	0.920356
		6	117.6				139.3	159.1	1.19876	1.07483	134.8	149.4	1.17615	1.05455		146.2	1.01882	0.913483
		Daily Average	109.417				132.72				127.025				143.5
					Average	1				1.045				0.99595				1.01873
					Standard Error of the Mean (SEM)	0.0190487				0.016879				0.016983				0.011563
