# Supplementary material for: The kinase Rio1 and a ribosome collision-dependent decay pathway survey the integrity of 18S rRNA cleavage
Source: PLoS Biol. 2024 Apr 25;22(4):e3001767. doi: 10.1371/journal.pbio.3001767 (PMC11045238; doi:10.1371/journal.pbio.3001767)
Supplement: S6 Data — (XLSX) [file pbio.3001767.s019.xlsx]

## Sheet: Figure 6A
Figure 6A (Left)
			Read Depth									Read Depth											Read Depth as a Fraction of Aligned Reads											Read Depth as a Fraction of Aligned Reads
			Gal::Pno1; Gal::Dim1 + Dim1-E85A + Pno1									Gal::Pno1; Gal::Dim1 + Dim1-E85A + Pno1-KKKF											Gal::Pno1; Gal::Dim1 + Dim1-E85A + Pno1											Gal::Pno1; Gal::Dim1 + Dim1-E85A + Pno1-KKKF
		Nucleotide Position	1	2	3	4	5	6	7	8	Nucleotide Position	1	2	3	4	5	6	7	8			Nucleotide Position	1	2	3	4	5	6	7	8	Average	Standard Error of the Mean (SEM)		1	2	3	4	5	6	7	8	Average	Standard Error of the Mean (SEM)
	3' 18S rRNA	1780	2847537	2648979	2615353	3639773	3789442	3078898	3461621	3147994	1780	2749147	2633324	2636107	2928258	4373678	3080906	2716350	2901093		3' 18S rRNA	1780	0.999999	1	1	1	1	0.996867	0.998508	0.99869	0.999258	0.000408672		0.999997	0.999999	0.999999	0.999999	0.999999	0.998078	0.998182	0.997932	0.999273	0.000354784
		1781	2847374	2648824	2615201	3639632	3789243	3079968	3462982	3149683	1781	2748782	2632925	2635721	2928008	4373253	3082695	2717657	2902383			1781	0.999941	0.999941	0.999941	0.999961	0.999948	0.997214	0.9989	0.999226	0.999384	0.000342082		0.999864	0.999848	0.999852	0.999913	0.999902	0.998658	0.998662	0.998375	0.999384	0.00024197
		1782	2847541	2648979	2615354	3639773	3789441	3087241	3466235	3151753	1782	2749156	2633326	2636110	2928262	4373681	3086115	2720694	2906354			1782	1	1	1	1	1	0.999568	0.999838	0.999882	0.999911	5.39606e-05		1	1	1	1	1	0.999766	0.999778	0.999741	0.999911	4.37244e-05
		1783	2847512	2648951	2615332	3639735	3789399	3088574	3466795	3152124	1783	2749136	2633307	2636086	2928223	4373613	3086838	2721297	2907106			1783	0.99999	0.999989	0.999992	0.99999	0.999989	1	1	1	0.999994	1.87494e-06		0.999993	0.999993	0.999991	0.999987	0.999984	1	1	1	0.999993	2.16699e-06
		1784	2847539	2648973	2615352	3639769	3789434	3088560	3466750	3152098	1784	2749154	2633325	2636110	2928252	4373669	3086800	2721255	2907083			1784	0.999999	0.999998	0.999999	0.999999	0.999998	0.999995	0.999987	0.999992	0.999996	1.56043e-06		0.999999	1	1	0.999997	0.999997	0.999988	0.999985	0.999992	0.999995	2.07846e-06
		1785	2847203	2648837	2615233	3639720	3789360	3088478	3466632	3151994	1785	2748996	2633217	2636024	2928204	4373569	3086691	2721167	2906969			1785	0.999881	0.999946	0.999954	0.999985	0.999979	0.999969	0.999953	0.999959	0.999953	1.1323e-05		0.999942	0.999959	0.999967	0.99998	0.999974	0.999952	0.999952	0.999953	0.99996	4.57425e-06
		1786	2846645	2648357	2614901	3639550	3789002	3087968	3465920	3151352	1786	2748575	2632950	2635781	2927950	4372632	3085943	2720585	2906392			1786	0.999685	0.999765	0.999827	0.999939	0.999884	0.999804	0.999748	0.999755	0.999801	2.87151e-05		0.999789	0.999857	0.999875	0.999893	0.99976	0.99971	0.999738	0.999754	0.999797	2.43789e-05
		1787	2846569	2648635	2615058	3639599	3789206	3088390	3466514	3151912	1787	2748709	2633049	2635862	2928069	4373311	3086586	2721074	2906868			1787	0.999659	0.99987	0.999887	0.999952	0.999938	0.99994	0.999919	0.999933	0.999887	3.4133e-05		0.999837	0.999895	0.999906	0.999934	0.999915	0.999918	0.999918	0.999918	0.999905	1.04788e-05
		1788	2845048	2647427	2614108	3638657	3787720	3087305	3465160	3150593	1788	2747797	2632218	2635190	2926860	4370638	3085231	2719897	2905727			1788	0.999125	0.999414	0.999524	0.999693	0.999546	0.999589	0.999528	0.999514	0.999492	5.92851e-05		0.999506	0.999579	0.999651	0.999521	0.999304	0.999479	0.999486	0.999526	0.999506	3.50599e-05
		1789	2845481	2648372	2614922	3639397	3789015	3088356	3466508	3151882	1789	2748479	2632830	2635648	2927507	4372987	3086548	2721017	2906838			1789	0.999277	0.999771	0.999835	0.999897	0.999888	0.999929	0.999917	0.999923	0.999805	7.77554e-05		0.999754	0.999812	0.999825	0.999742	0.999841	0.999906	0.999897	0.999908	0.999836	2.31902e-05
		1790	2845219	2648141	2614756	3639179	3788847	3088211	3466290	3151684	1790	2748264	2632646	2635452	2927253	4372654	3086348	2720871	2906696			1790	0.999185	0.999684	0.999771	0.999837	0.999843	0.999882	0.999854	0.99986	0.99974	8.24372e-05		0.999676	0.999742	0.99975	0.999655	0.999765	0.999841	0.999843	0.999859	0.999766	2.72377e-05
		1791	2842411	2645781	2613374	3637105	3787163	3088104	3465710	3151329	1791	2745501	2629771	2632806	2922734	4368425	3085930	2720561	2906213			1791	0.998198	0.998793	0.999243	0.999267	0.999399	0.999848	0.999687	0.999748	0.999273	0.000194998		0.998671	0.99865	0.998747	0.998112	0.998798	0.999706	0.99973	0.999693	0.999013	0.000216845
		1792	2830038	2639002	2608583	3628645	3780452	3086630	3462213	3148162	1792	2736305	2619042	2624246	2896136	4353366	3082928	2718311	2902676			1792	0.993853	0.996234	0.997411	0.996943	0.997628	0.999371	0.998678	0.998743	0.997358	0.000619727		0.995325	0.994576	0.995499	0.989029	0.995355	0.998733	0.998903	0.998476	0.995737	0.00114346
		1793	2826067	2636445	2606679	3625308	3777287	3086194	3460970	3147168	1793	2733843	2616208	2621381	2888796	4348225	3082011	2717598	2901529			1793	0.992459	0.995268	0.996683	0.996026	0.996793	0.999229	0.99832	0.998428	0.996651	0.000761675		0.99443	0.993499	0.994413	0.986522	0.99418	0.998436	0.998641	0.998082	0.994775	0.0013991
		1794	2821678	2633960	2604890	3622481	3774980	3085527	3459543	3145788	1794	2730918	2612750	2618105	2881171	4343730	3080773	2716560	2899921			1794	0.990917	0.99433	0.995999	0.995249	0.996184	0.999013	0.997908	0.99799	0.995949	0.000905135		0.993366	0.992186	0.99317	0.983918	0.993152	0.998035	0.998259	0.997528	0.993702	0.00165239
		1795	2820851	2633095	2604330	3621553	3774140	3085211	3459060	3145355	1795	2730277	2612087	2617340	2879754	4342512	3080261	2716042	2899464			1795	0.990627	0.994004	0.995785	0.994994	0.995962	0.998911	0.997769	0.997853	0.995738	0.000929672		0.993133	0.991935	0.99288	0.983435	0.992874	0.997869	0.998069	0.997371	0.993446	0.00168822
		1796	2818980	2631701	2603333	3620044	3772730	3084912	3458543	3144843	1796	2728659	2610525	2615740	2877085	4340336	3079800	2715565	2898909			1796	0.98997	0.993477	0.995404	0.99458	0.99559	0.998814	0.99762	0.99769	0.995393	0.000997496		0.992544	0.991341	0.992273	0.982523	0.992376	0.99772	0.997894	0.99718	0.992981	0.00177956
		1797	2772878	2606702	2582227	3591522	3746187	3077367	3444665	3130922	1797	2689776	2564712	2581318	2807614	4300478	3067845	2704522	2883523			1797	0.97378	0.98404	0.987334	0.986743	0.988586	0.996371	0.993617	0.993274	0.987968	0.00249889		0.978401	0.973944	0.979215	0.958799	0.983263	0.993847	0.993836	0.991888	0.981649	0.00423152
		1798	2770289	2604211	2580442	3588247	3743881	3076588	3443542	3129810	1798	2687456	2562325	2578655	2804928	4296680	3066746	2703353	2882288			1798	0.972871	0.9831	0.986651	0.985844	0.987977	0.996119	0.993293	0.992921	0.987347	0.0025847		0.977557	0.973038	0.978205	0.957882	0.982394	0.993491	0.993406	0.991463	0.980929	0.00430708
		1799	2768807	2602669	2579481	3586708	3742551	3076045	3442715	3128749	1799	2685892	2560882	2576839	2803332	4294152	3065821	2702193	2881071			1799	0.97235	0.982518	0.986284	0.985421	0.987626	0.995943	0.993054	0.992584	0.986973	0.00262516		0.976988	0.97249	0.977516	0.957336	0.981816	0.993191	0.99298	0.991044	0.98042	0.00433351
	Canonical 3'-end of 18S rRNA	1800	2756411	2593365	2571776	3574740	3730115	3067644	3429171	3116542	1800	2675441	2550099	2565586	2793180	4282156	3053157	2689925	2867711		Canonical 3'-end of 18S rRNA	1800	0.967997	0.979005	0.983338	0.982133	0.984344	0.993223	0.989147	0.988712	0.983487	0.002728		0.973186	0.968395	0.973247	0.95387	0.979074	0.989089	0.988472	0.986449	0.976473	0.00424009
		Maximum Read Depth in 18S rRNA	2847541	2648979	2615354	3639773	3789441	3088574	3466795	3152124	Maximum Read Depth in 18S rRNA	2749156	2633326	2636110	2928262	4373681	3086838	2721297	2907106
Figure 6A (Right)
		Fraction of Reads Cleaved After Indicated Nucleotide
		Gal::Pno1; Gal::Dim1 + Dim1-E85A + Pno1
	Miscleavage Position	1	2	3	4	5	6	7	8	Average	Standard Error of the Mean (SEM)
	18S -5	0.000661272	0.000528128	0.00038312	0.00041156	0.00036681	9.9075e-05	0.00015173	0.00016624	0.000345992	6.93982e-05
	18S -4	0.0161915	0.00944251	0.00807195	0.0078428	0.00701396	0.00245194	0.00400976	0.00442368	0.00743101	0.00150646
	18S -3	0.000908152	0.00094074	0.00068251	0.00090006	0.00060853	0.00025222	0.00032393	0.00035278	0.000621115	0.00010024
	18S -2	0.000522205	0.000581734	0.00036821	0.00042255	0.00035098	0.00017581	0.00023884	0.0003366	0.000374616	4.76186e-05
	18S -1	0.00413901	0.00344812	0.0028608	0.00323097	0.00326275	0.00271452	0.00389639	0.00386533	0.00342724	0.000179954
	Total	0.0224222	0.0149412	0.0123666	0.0128079	0.011603	0.00569357	0.00862064	0.00914463	0.0122	0.00177905
		Fraction of Reads Cleaved After Indicated Nucleotide
		Gal::Pno1; Gal::Dim1 + Dim1-E85A + Pno1-KKKF
	Miscleavage Position	1	2	3	4	5	6	7	8	Average	Standard Error of the Mean (SEM)
	18S -5	0.00058563	0.00059469	0.00060316	0.00090907	0.00050027	0.00014999	0.00017565	0.00019057	0.000463629	9.51646e-05
	18S -4	0.0141498	0.0174016	0.0130655	0.0237298	0.00912252	0.00388521	0.00406865	0.00530287	0.0113407	0.00250333
	18S -3	0.00084571	0.00090722	0.00101058	0.00091795	0.00086815	0.00035635	0.00042994	0.00042482	0.00072009	9.44846e-05
	18S -2	0.00056927	0.0005476	0.00068965	0.0005464	0.00057823	0.00029966	0.00042627	0.00041863	0.000509464	4.28413e-05
	18S -1	0.00358692	0.00390533	0.00414854	0.00333167	0.00270939	0.00409869	0.00449933	0.00459013	0.00385875	0.000222073
	Total	0.0197373	0.0233564	0.0195174	0.0294349	0.0137786	0.0087899	0.00959983	0.010927	0.0168927	0.00259875

## Sheet: Figure 6B
Figure 6B
												Pno1 / Rps10		Pno1 / Rps8		Pno1 / Asc1
	Condition	Biological Replicate	Rps10	Rps8	Asc1	Pno1		Pno1 / Rps10	Pno1 / Rps8	Pno1 / Asc1	Condition	Average	Standard error of the mean (SEM)	Average	Standard error of the mean (SEM)	Average	Standard Error of the Mean (SEM)
	NOY504 + WT 18S	1	5741.49	8870.27	6893.95	2075.79		0.361542	0.234017	0.301103	NOY504 + WT 18S	0.325922	0.0429408	0.449954	0.0872493	0.360422	0.0815606
		2	5391.15	7939.44	7656.18	1920.57		0.356245	0.241902	0.250852
		3	16352.7	6125.42	5065.93	3406.95		0.208341	0.556199	0.672522
		4	4843.61	3488.18	6078.64	2182.35		0.450562	0.625641	0.359019
		5	6465.83	2762.33	7480.47	1635.33		0.252918	0.592011	0.218613
	NOY504 + 18S-4	1	3372.47	1450.5	3844.38	1781.91		0.52837	1.22848	0.463511	NOY504 + 18S-4	1.00369	0.243983	2.18025	0.430549	0.794556	0.164626
		2	4075.81	2164.98	3673.67	3356.47		0.823509	1.55034	0.913656
		3	4950.71	4290.28	9238.17	8104.32		1.637	1.889	0.877264
		4	7225.39	1396.55	8798.83	3609.71		0.499587	2.58474	0.410249
		5	4399.93	1844.96	5146.2	6731.73		1.52996	3.64871	1.3081

## Sheet: Figure 6C
Figure 6C
The graphs on the left and right show the same data, presented in a different order for clarity in representing statistical comparisons.
		Doubling Times (min)
		NOY504; Gal::Pno1
		Pno1						Pno1-KKKF
	Biological Replicate	WT 18S	e.v.	18S -1	18S -2	18S -3	18S -4	WT 18S	e.v.	18S -1	18S -2	18S -3	18S -4
	1	360.4	879	357.1	715.35	614.75	934.55	461.3	627.55	567.75	574.65	352.75	357.45
	2	349.85	637.75	472.2	663.4	664.5	648.3	389.5	639.45	329.7	551.4	319.1	273.85
	3	546.6	798.7	545.95	602.45	722.15	525.6	431.5	873.45	419	514.9	476.75	372.95
	4	462.2	749.75	471.7	639.15	773.75	656.75	351.95	619.25	303.8	529.3	505.7	302.95
	5	617.2	910.85	391.4	852.3	940.3	950.25			329.5	419.5	426.4	324.25
	6	324.55	875.25	450.85	910.65	802.6	688.95			430.3	391.4	297.75	327.95
	7	546.75	841.9	618.1	621.55	571.1	759.55			352.2	344.55	363.55	369.2
	8	248.6	765.75	568.7	809.9	700.05	668.9			359.7	345.4	366.4	292.8
	9	520.7	709.25	378.3	636.95	614.1	680.15
	10	527.7	758.95	666.45	695.3	956.35	660.1
	11	531.4	681.1	591.25	706.45	939.55	586.55
	12	459.45	922.75	571.2	752.55	511.35	623.7
	13	422.7	876.2	623.15	769.05	489.6	689.65
	14	256.15	875.15	642.25	841.3	867.65	663.1
	15	275.3	558.55	454.2	829.9	526.35	793.7
	16	360.3	552.35	400.35	693.6	751.3	613.85
	17	382.3	752.7	370.75	648	727.5	529.5
	18	329.1	782.6	423.1	712.1	610	524.05
	19	323.6	849.85	544.25	715.4	627.35	636.45
	20	844.5	1014.1	576.8	652.2		574
	21	588.55	614.75	477.2	772.1		537.2
	22	768.7	606.85				704.85
	23	526.65
	24	519.3
	25	278
	Average	454.822	773.368	504.536	725.698	705.805	665.895	408.562	689.925	386.494	458.887	388.55	327.675
	Standard Error of the Mean (SEM)	30.7422	26.8499	21.3188	18.6284	33.5112	24.4624	23.9369	61.3153	30.1885	33.3041	26.1866	12.9541
