# Supplementary material for: The kinase Rio1 and a ribosome collision-dependent decay pathway survey the integrity of 18S rRNA cleavage
Source: PLoS Biol. 2024 Apr 25;22(4):e3001767. doi: 10.1371/journal.pbio.3001767 (PMC11045238; doi:10.1371/journal.pbio.3001767)
Supplement: S7 Data — (XLSX) [file pbio.3001767.s020.xlsx]

## Sheet: Figure 7A
Figure 7A
		H44-D
	Rio1 concentration (µM)	Unbound RNA	Protein-Bound RNA	Fraction of Protein-Bound RNA
	0	19632.5		0
	0.1	18676.6		0
	0.25	19482.5		0
	0.5	14842.2		0
	1	5594.9		0
	2.5	2504.72	4433.41	0.638992
	5	1933.48	6328.47	0.765978
	10	2170.65	8743.89	0.801123
		H44-D+3
	Rio1 concentration (µM)	Unbound RNA	Protein-Bound RNA	Fraction of Protein-Bound RNA
	0	29113.2		0
	0.1	22971.5		0
	0.25	18989		0
	0.5	13965.4		0
	1	9802.47		0
	2.5	5573.05	3093.88	0.356976
	5	4963.49	7210.02	0.592271
	10	5475.61	11111.3	0.669883
		H44-D-4
	Rio1 concentration (µM)	Unbound RNA	Protein-Bound RNA	Fraction of Protein-Bound RNA
	0	16048.7		0
	0.1	18806.2		0
	0.25	18221.3		0
	0.5	19163.6		0
	1	18367.3		0
	2.5	12954.4	2557.4	0.164868
	5	13931.4	5312.9	0.276076
	10	13913.8	7673.87	0.355475

## Sheet: Figure 7B
Figure 7B
		Kd (µM^2)				Fold Change in Kd Relative to H44-D Per Gel
	Biological Replicate	H44-D	H44-D+3	H44-D-4		H44-D	H44-D+3	H44-D-4
	1	1.85	3.081	8.9		1	1.66541	4.81081
	2	3.413	4.561	7.115		1	1.33636	2.08468
	3	1.637	2.27	5.725		1	1.38668	3.49725
					Average	1	1.46282	3.46425
					Standard Error of the Mean (SEM)	0	0.102331	0.78714

## Sheet: Figure 7D
Figure 7D (Left)
									Average	Standard Error of the Mean (SEM)
							Average WT 18S	Normalized to WT 18S	Normalized to WT 18S	Normalized to WT 18S
				18S Tag	U2	18S Tag/U2	18S Tag/U2	18S Tag/U2	18S Tag/U2	18S Tag/U2
	BY4741	e.v.	WT 18S	28367.1	11861.9	2.39145	1.9289	1.2398	1	0.0925978
				27372.7	13855.9	1.97553		1.02417
				41056.6	22677.5	1.81046		0.938598
				30827.2	20041.5	1.53816		0.797431
			e.v.		19249	0		0	0	0
					16224	0		0
			18S-2	5531.35	17161.6	0.32231		0.167095	0.195108	0.0205801
				5933.76	13077.5	0.453737		0.235231
				6528.78	18495.9	0.352985		0.182998
			18S-4	8268.15	22901	0.361039		0.187174	0.165707	0.021467
				7769.66	27926	0.278223		0.144239
		Cup1::Rio1	WT 18S	28351.8	21450.9	1.32171	1.44069	0.917414	1	0.152248
				29116.9	13959.6	2.08581		1.44779
				28734.3	23114.8	1.24311		0.862863
				29065.9	26135.7	1.11212		0.771936
			e.v.		19548.2	0		0	0	0
					17334	0		0
			18S-2	11783.5	17604.6	0.669344		0.464601	0.438925	0.0159962
				11021.5	18679.1	0.590045		0.409559
				8654.73	13572.5	0.637668		0.442614
			18S-4	7505.78	14075.6	0.533248		0.370135	0.317231	0.0529038
				8643.95	22698.7	0.380813		0.264327
Figure 7D (Right)
									Average	Standard Error of the Mean (SEM)
							Average WT 18S	Normalized to WT 18S	Normalized to WT 18S	Normalized to WT 18S
				20S	U2	20S/U2	20S/U2	20S/U2	20S/U2	20S/U2
	BY4741	e.v.	WT 18S	5892.76	11861.9	0.49678	0.466227	1.06553	1	0.0807873
				5703.93	13855.9	0.411661		0.882962
				12661.1	22677.5	0.558311		1.19751
				7979.66	20041.5	0.398156		0.853996
			e.v.	7298.42	19249	0.379157		0.813246	0.88616	0.0729138
				7254.49	16224	0.447146		0.959074
			18S-2	31451.5	17161.6	1.83267		3.93085	4.07267	0.220183
				27465.1	13077.5	2.10018		4.50462
				32617.8	18495.9	1.76351		3.78252
			18S-4	10503.4	22901	0.458644		0.983736	1.63668	0.652943
				29810.5	27926	1.06748		2.28962
		Cup1::Rio1	WT 18S	7655.66	21450.9	0.356891	0.30965	1.15256	1	0.08098
				4528.86	13959.6	0.324427		1.04772
				5520.18	23114.8	0.238816		0.771244
				8323.32	26135.7	0.318465		1.02847
			e.v.	5890	19548.2	0.301307		0.973058	1.21461	0.241551
				7815.9	17334	0.450899		1.45616
			18S-2	48342.4	17604.6	2.74602		8.86813	8.60844	0.162532
				48060.7	18679.1	2.57296		8.30927
				36344.7	13572.5	2.67782		8.6479
			18S-4	26225.9	14075.6	1.86322		6.01718	5.8398	0.177379
				39799.2	22698.7	1.75337		5.66242

## Sheet: Figure 7E
Figure 7E
		Doubling Time (min)
		NOY504; Gal::Rio1
		Cyc1:Rio1						Cup1:Rio1
	Biological Replicates	WT 18S	e.v.	18S-1	18S-2	18S-3	18S-4	WT 18S	e.v.	18S-1	18S-2	18S-3	18S-4
	1	334.2	811.55	377.4	498.1	672.1	781.3	275.95	667.05	419.45	518.65	716.75	880
	2	363.25	552.8	395.4	719.1	505.1	537.25	311.6	694.25	373	647	588.25	940.45
	3	294.55	654.8	381.25	691.05	639.1	696.4	324.9	759.7	454.4	618.05	726.1	729.2
	4	339	521.8	386.05	498	500.15	604.7	351.05	617.65	351.65	426.45	624.55	874.45
	5	324	388.1	357.85	626.1	343.25	330.3	334.1	544.7	304.6	439.35	449.05	463.95
	6	336.9	432.2	298	315.2	385.3	342.5	304.3	708.85		588.95	882.9	781.25
	7	299.8	487.65	309.8	439.25	392.25	319.3	283	722.4			601.1	672.35
	8	266.9	651.1	299.55	426.95	714.75	388.6	247.95					573.05
	9	328.1	511	274.8	425.8	602.05	493.05
	10	329.5	544.85	270	610.6	481.6	716.85
	11	291.85	575.1	298.25	636.3	583	567.35
	12	284.8	483.75	228.35	467.05	593.5	574.15
	13	397.8	463.8	268.9	421.65	475.5	374
	14	381.35	576.1		534.95	520.95	482.85
	15	315.2	568.15			369.7	468.65
	16	287.25					427.8
	17	247.1
	Average	318.915	548.183	318.892	522.15	518.553	506.566	304.106	673.514	380.62	539.742	655.529	739.338
	Standard Error of the Mean (SEM)	9.58786	26.6681	15.0946	31.578	29.5752	35.7946	11.9401	27.2782	26.1033	38.0422	51.5263	57.9908
