# Supplementary material for: The kinase Rio1 and a ribosome collision-dependent decay pathway survey the integrity of 18S rRNA cleavage
Source: PLoS Biol. 2024 Apr 25;22(4):e3001767. doi: 10.1371/journal.pbio.3001767 (PMC11045238; doi:10.1371/journal.pbio.3001767)
Supplement: S8 Data — (XLSX) [file pbio.3001767.s021.xlsx]

## Sheet: Figure S2B
Figure S2B
			Read Depth											Read Depth as a Fraction of Aligned Reads
			Gal::Pno1; Gal::Dim1 + Dim1-E85A + Pno1											Gal::Pno1; Gal::Dim1 + Dim1-E85A + Pno1
		Nucleotide Position	1	2	3	4	5	6	7	8			Nucleotide Position	1	2	3	4	5	6	7	8	Average	Standard Error of the Mean (SEM)
	3' 18S rRNA	1780	2847537	2648979	2615353	3639773	3789442	3078898	3461621	3147994		3' 18S rRNA	1780	0.999999	1	1	1	1	0.996867	0.998508	0.99869	0.999258	0.000408672
		1781	2847374	2648824	2615201	3639632	3789243	3079968	3462982	3149683			1781	0.999941	0.999941	0.999941	0.999961	0.999948	0.997214	0.9989	0.999226	0.999384	0.000342082
		1782	2847541	2648979	2615354	3639773	3789441	3087241	3466235	3151753			1782	1	1	1	1	1	0.999568	0.999838	0.999882	0.999911	5.39606e-05
		1783	2847512	2648951	2615332	3639735	3789399	3088574	3466795	3152124			1783	0.99999	0.999989	0.999992	0.99999	0.999989	1	1	1	0.999994	1.87494e-06
		1784	2847539	2648973	2615352	3639769	3789434	3088560	3466750	3152098			1784	0.999999	0.999998	0.999999	0.999999	0.999998	0.999995	0.999987	0.999992	0.999996	1.56043e-06
		1785	2847203	2648837	2615233	3639720	3789360	3088478	3466632	3151994			1785	0.999881	0.999946	0.999954	0.999985	0.999979	0.999969	0.999953	0.999959	0.999953	1.1323e-05
		1786	2846645	2648357	2614901	3639550	3789002	3087968	3465920	3151352			1786	0.999685	0.999765	0.999827	0.999939	0.999884	0.999804	0.999748	0.999755	0.999801	2.87151e-05
		1787	2846569	2648635	2615058	3639599	3789206	3088390	3466514	3151912			1787	0.999659	0.99987	0.999887	0.999952	0.999938	0.99994	0.999919	0.999933	0.999887	3.4133e-05
		1788	2845048	2647427	2614108	3638657	3787720	3087305	3465160	3150593			1788	0.999125	0.999414	0.999524	0.999693	0.999546	0.999589	0.999528	0.999514	0.999492	5.92851e-05
		1789	2845481	2648372	2614922	3639397	3789015	3088356	3466508	3151882			1789	0.999277	0.999771	0.999835	0.999897	0.999888	0.999929	0.999917	0.999923	0.999805	7.77554e-05
		1790	2845219	2648141	2614756	3639179	3788847	3088211	3466290	3151684			1790	0.999185	0.999684	0.999771	0.999837	0.999843	0.999882	0.999854	0.99986	0.99974	8.24372e-05
		1791	2842411	2645781	2613374	3637105	3787163	3088104	3465710	3151329			1791	0.998198	0.998793	0.999243	0.999267	0.999399	0.999848	0.999687	0.999748	0.999273	0.000194998
		1792	2830038	2639002	2608583	3628645	3780452	3086630	3462213	3148162			1792	0.993853	0.996234	0.997411	0.996943	0.997628	0.999371	0.998678	0.998743	0.997358	0.000619727
		1793	2826067	2636445	2606679	3625308	3777287	3086194	3460970	3147168			1793	0.992459	0.995268	0.996683	0.996026	0.996793	0.999229	0.99832	0.998428	0.996651	0.000761675
		1794	2821678	2633960	2604890	3622481	3774980	3085527	3459543	3145788			1794	0.990917	0.99433	0.995999	0.995249	0.996184	0.999013	0.997908	0.99799	0.995949	0.000905135
		1795	2820851	2633095	2604330	3621553	3774140	3085211	3459060	3145355			1795	0.990627	0.994004	0.995785	0.994994	0.995962	0.998911	0.997769	0.997853	0.995738	0.000929672
		1796	2818980	2631701	2603333	3620044	3772730	3084912	3458543	3144843			1796	0.98997	0.993477	0.995404	0.99458	0.99559	0.998814	0.99762	0.99769	0.995393	0.000997496
		1797	2772878	2606702	2582227	3591522	3746187	3077367	3444665	3130922			1797	0.97378	0.98404	0.987334	0.986743	0.988586	0.996371	0.993617	0.993274	0.987968	0.00249889
		1798	2770289	2604211	2580442	3588247	3743881	3076588	3443542	3129810			1798	0.972871	0.9831	0.986651	0.985844	0.987977	0.996119	0.993293	0.992921	0.987347	0.0025847
		1799	2768807	2602669	2579481	3586708	3742551	3076045	3442715	3128749			1799	0.97235	0.982518	0.986284	0.985421	0.987626	0.995943	0.993054	0.992584	0.986973	0.00262516
	Canonical 3'-end of 18S rRNA	1800	2756411	2593365	2571776	3574740	3730115	3067644	3429171	3116542		Canonical 3'-end of 18S rRNA	1800	0.967997	0.979005	0.983338	0.982133	0.984344	0.993223	0.989147	0.988712	0.983487	0.002728
	5' ITS1	1801	12007	4287	4864	4674	2705	2569	2576	2456		5' ITS1	1801	0.00421662	0.00161836	0.00185979	0.00128415	0.000713826	0.000831775	0.000743049	0.000779157	0.00150584	0.000416769
		1802	10274	3492	4202	3561	1789	2025	1761	1779			1802	0.00360803	0.00131824	0.00160667	0.000978358	0.000472101	0.000655642	0.000507962	0.000564381	0.00121392	0.000371642
		1803	9173	3202	3898	2948	1485	1940	1603	1627			1803	0.00322138	0.00120877	0.00149043	0.000809941	0.000391878	0.000628122	0.000462387	0.00051616	0.00109113	0.000333261
		1804	7850	2859	3520	2266	1143	1788	1400	1454			1804	0.00275676	0.00107928	0.0013459	0.000622566	0.000301628	0.000578908	0.000403831	0.000461276	0.000943769	0.000287849
		1805	5834	2316	2940	1476	821	1708	1310	1366			1805	0.00204879	0.000874299	0.00112413	0.00040552	0.000216655	0.000553006	0.000377871	0.000433359	0.000754203	0.00021225
		1806	4472	2071	2612	1075	622	1646	1253	1314			1806	0.00157048	0.000781811	0.000998718	0.000295348	0.00016414	0.000532932	0.000361429	0.000416862	0.000640215	0.00016359
		1807	3450	1867	2396	811	550	1609	1204	1281			1807	0.00121157	0.0007048	0.000916128	0.000222816	0.00014514	0.000520952	0.000347295	0.000406393	0.000559387	0.000128765
		1808	2906	1763	2245	692	523	1603	1176	1269			1808	0.00102053	0.000665539	0.000858392	0.000190122	0.000138015	0.00051901	0.000339218	0.000402586	0.000516676	0.000110787
		1809	2478	1627	2084	575	488	1578	1133	1243			1809	0.000870225	0.000614199	0.000796833	0.000157977	0.000128779	0.000510915	0.000326815	0.000394337	0.00047501	9.72187e-05
		1810	2178	1529	1945	516	449	1517	1067	1189			1810	0.00076487	0.000577204	0.000743685	0.000141767	0.000118487	0.000491165	0.000307777	0.000377206	0.00044027	8.79272e-05
		1811	1794	1216	1526	335	354	1330	935	1058			1811	0.000630017	0.000459045	0.000583477	9.20387e-05	9.34175e-05	0.000430619	0.000269702	0.000335647	0.000361745	7.1868e-05
		1812	1688	1141	1443	295	335	1265	888	1016			1812	0.000592792	0.000430732	0.000551742	8.1049e-05	8.84035e-05	0.000409574	0.000256144	0.000322322	0.000341595	6.80719e-05
		1813	1556	1060	1358	267	299	1222	825	981			1813	0.000546436	0.000400154	0.000519241	7.33562e-05	7.89035e-05	0.000395652	0.000237972	0.000311219	0.000320367	6.39313e-05
		1814	1412	967	1242	211	254	1150	744	912			1814	0.000495866	0.000365046	0.000474888	5.79706e-05	6.70284e-05	0.00037234	0.000214607	0.000289329	0.000292134	5.94887e-05
		1815	1386	945	1223	203	239	1122	723	899			1815	0.000486736	0.000356741	0.000467623	5.57727e-05	6.307e-05	0.000363274	0.00020855	0.000285205	0.000285871	5.87e-05
		1816	1350	928	1193	197	230	1115	712	892			1816	0.000474093	0.000350324	0.000456152	5.41243e-05	6.0695e-05	0.000361008	0.000205377	0.000282984	0.000280595	5.7461e-05
		1817	1311	906	1175	187	214	1101	698	880			1817	0.000460397	0.000342019	0.00044927	5.13768e-05	5.64727e-05	0.000356475	0.000201339	0.000279177	0.000274566	5.65489e-05
		1818	1263	870	1141	173	208	1086	682	858			1818	0.000443541	0.000328428	0.00043627	4.75304e-05	5.48894e-05	0.000351619	0.000196723	0.000272197	0.0002664	5.49144e-05
		1819	1161	789	1057	165	194	1047	652	832			1819	0.00040772	0.000297851	0.000404152	4.53325e-05	5.11949e-05	0.000338991	0.00018807	0.000263949	0.000249658	5.07601e-05
		1820	1016	650	914	143	151	946	605	776			1820	0.000356799	0.000245378	0.000349475	3.92882e-05	3.98476e-05	0.00030629	0.000174513	0.000246183	0.000219722	4.46081e-05
		Maximum Read Depth in 18S rRNA	2847541	2648979	2615354	3639773	3789441	3088574	3466795	3152124

## Sheet: Figure S2C
Figure S2C (Left)
			Read Depth				Read Depth					Read Depth as a Fraction of Aligned Reads (Normalized Read Depth)						Read Depth as a Fraction of Aligned Reads (Normalized Read Depth)
			Gal::Pno1; Gal::Dim1 + Pno1 + Dim1-E85A				∆Rps14B; Gal::Rps14A; Gal::Dim1 + Rps14 + Dim1					Gal::Pno1; Gal::Dim1 + Pno1 + Dim1-E85A						∆Rps14B; Gal::Rps14A; Gal::Dim1 + Rps14 + Dim1
		Nucleotide Position	1	2	3		1	2			Nucleotide Position	1	2	3	Average	Standard Error of the Mean (SEM)		1	2	Average	Standard Error of the Mean (SEM)
	3' 18S rRNA	1780	3078898	3461621	3147994		2894269	3460653		3' 18S rRNA	1780	0.996867	0.998508	0.99869	0.998021	0.000579559		0.98309	0.983607	0.983349	0.000258199
		1781	3079968	3462982	3149683		2892306	3457732			1781	0.997214	0.9989	0.999226	0.998446	0.000623542		0.982424	0.982776	0.9826	0.000176472
		1782	3087241	3466235	3151753		2935865	3508232			1782	0.999568	0.999838	0.999882	0.999763	9.81443e-05		0.997219	0.99713	0.997175	4.46252e-05
		1783	3088574	3466795	3152124		2944052	3518330			1783	1	1	1	1	0		1	1	1	0
		1784	3088560	3466750	3152098		2944029	3518286			1784	0.999995	0.999987	0.999992	0.999991	2.44445e-06		0.999992	0.999987	0.99999	2.34679e-06
		1785	3088478	3466632	3151994		2943910	3518123			1785	0.999969	0.999953	0.999959	0.99996	4.65777e-06		0.999952	0.999941	0.999946	5.30094e-06
		1786	3087968	3465920	3151352		2943790	3517983			1786	0.999804	0.999748	0.999755	0.999769	1.76153e-05		0.999911	0.999901	0.999906	4.81667e-06
		1787	3088390	3466514	3151912		2943758	3517928			1787	0.99994	0.999919	0.999933	0.999931	6.28406e-06		0.9999	0.999886	0.999893	7.19819e-06
		1788	3087305	3465160	3150593		2943313	3517448			1788	0.999589	0.999528	0.999514	0.999544	2.29602e-05		0.999749	0.999749	0.999749	1.63736e-07
		1789	3088356	3466508	3151882		2943740	3517926			1789	0.999929	0.999917	0.999923	0.999923	3.52273e-06		0.999894	0.999885	0.99989	4.42541e-06
		1790	3088211	3466290	3151684		2943612	3517777			1790	0.999882	0.999854	0.99986	0.999866	8.54811e-06		0.999851	0.999843	0.999847	3.86148e-06
		1791	3088104	3465710	3151329		2943489	3517208			1791	0.999848	0.999687	0.999748	0.999761	4.6877e-05		0.999809	0.999681	0.999745	6.38341e-05
		1792	3086630	3462213	3148162		2942122	3513655			1792	0.999371	0.998678	0.998743	0.998931	0.000220756		0.999344	0.998671	0.999008	0.000336598
		1793	3086194	3460970	3147168		2941341	3512308			1793	0.999229	0.99832	0.998428	0.998659	0.00028692		0.999079	0.998288	0.998684	0.000395384
		1794	3085527	3459543	3145788		2940699	3510923			1794	0.999013	0.997908	0.99799	0.998304	0.000355591		0.998861	0.997895	0.998378	0.000483177
		1795	3085211	3459060	3145355		2940341	3510447			1795	0.998911	0.997769	0.997853	0.998178	0.000367613		0.998739	0.997759	0.998249	0.000490022
		1796	3084912	3458543	3144843		2940068	3509922			1796	0.998814	0.99762	0.99769	0.998041	0.000387009		0.998647	0.99761	0.998128	0.000518267
		1797	3077367	3444665	3130922		2931167	3496297			1797	0.996371	0.993617	0.993274	0.994421	0.000980442		0.995623	0.993738	0.994681	0.000942862
		1798	3076588	3443542	3129810		2930619	3495602			1798	0.996119	0.993293	0.992921	0.994111	0.00100986		0.995437	0.99354	0.994489	0.000948562
		1799	3076045	3442715	3128749		2930053	3494863			1799	0.995943	0.993054	0.992584	0.993861	0.00105019		0.995245	0.99333	0.994288	0.000957457
	Canonical 3'-end of 18S rRNA	1800	3067644	3429171	3116542		2921069	3483438		Canonical 3'-end of 18S rRNA	1800	0.993223	0.989147	0.988712	0.990361	0.00143681		0.992193	0.990083	0.991138	0.00105531
		Maximum Read Depth in 18S rRNA	3088574	3466795	3152124	Maximum Read Depth in 18S rRNA	2944052	3518330
Figure S2C (Right)
		Gal::Pno1; Gal::Dim1 + Pno1 + Dim1-E85A
	Biological Replicate	1	2	3	Average	Standard Error of the Mean (SEM)
	Fraction of Miscleaved Reads	0.00760286	0.0115859	0.0120608	0.0104165	0.00141349
		∆Rps14B; Gal::Rps14A; Gal::Dim1 + Rps14 + Dim1
	Biological Replicate	1	2		Average	Standard Error of the Mean (SEM)
	Fraction of Miscleaved Reads	0.00815271	0.0102668		0.00920976	0.00105704
