# Supplementary material for: The kinase Rio1 and a ribosome collision-dependent decay pathway survey the integrity of 18S rRNA cleavage
Source: PLoS Biol. 2024 Apr 25;22(4):e3001767. doi: 10.1371/journal.pbio.3001767 (PMC11045238; doi:10.1371/journal.pbio.3001767)
Supplement: S9 Data — (XLSX) [file pbio.3001767.s022.xlsx]

## Sheet: Figure S3A
Figure S3A
	Condition		Time (min)	Biological Replicate	18S Tag	18S	18S Tag / 18S	18S Tag / 18S relative to t=0				WT 18S	18S-2	18S-4
	BY4741	WT 18S	0	1	61719622	36318218	1.69941	1			Exponential growth equation [2]
				2	38291437	15840417	2.41732	1			Best-fit values
			20	1	48072629	28193641	1.70509	1.00334			k	0.003748	0.01586	0.0105
				2	36703898	10781755	3.40426	1.40828			Tau	266.8	63.04	95.25
			40	1	55518349	22792363	2.43583	1.43334			Doubling Time	184.9	43.69	66.02
				2	31439618	16614422	1.89231	0.782811			95% CI (profile likelihood)
			60	1	21387089	15316190	1.39637	0.821679			k	0.001537 to 0.006504	0.01339 to 0.01889	0.007928 to 0.01376
				2	48885408	22252125	2.19689	0.908809			Tau	153.8 to 650.4	52.95 to 74.69	72.70 to 126.1
			80	1	19745943	15879173	1.24351	0.731731			Doubling Time	106.6 to 450.9	36.70 to 51.77	50.39 to 87.43
				2	49479400	29630140	1.6699	0.690805			Goodness of Fit
			100	1	12386211	11535230	1.07377	0.631849			Degrees of Freedom	13	13	13
				2	42213292	32396348	1.30303	0.539036			R squared	0.4302	0.9077	0.7387
			120	1	19387144	19820984	0.978112	0.575559			Sum of Squares	0.6371	0.09502	0.2536
				2	48897717	41424486	1.18041	0.488311			Sy.x	0.2214	0.08549	0.1397
	BY4741	18S-2	0	1	15483110	15667610	0.988224	1
				2	28808346	21823240	1.32008	1			Number of points
			20	1	5964948	11049849	0.539822	0.546254			# of X values	14	14	14
				2	19551872	21970548	0.889913	0.674137			# Y values analyzed	14	14	14
			40	1	8733333	18026038	0.484484	0.490258
				2	24757616	27328318	0.905933	0.686273
			60	1	3201060	11946525	0.267949	0.271142
				2	10959653	21711430	0.504787	0.382392
			80	1	5175435	19890600	0.260195	0.263296
				2	13191787	30331355	0.434922	0.329468
			100	1	4779456	22538148	0.212061	0.214588
				2	9194935	29867432	0.307858	0.233212
			120	1	2941061	20289248	0.144957	0.146684
				2	11259062	30834919	0.36514	0.276605
	BY4741	WT 18S-4	0	1	10118570	12523901	0.807941	1
				2	36597789	17345468	2.10993	1
			20	1	8641370	15814620	0.546417	0.676308
				2	30509184	21059661	1.4487	0.68661
			40	1	8169339	11702348	0.698094	0.864041
				2	24215959	19548159	1.23879	0.58712
			60	1	5256149	9171899	0.573071	0.709298
				2	19321375	23884399	0.808954	0.383402
			80	1	3648819	7548607	0.483376	0.598282
				2	14461192	25619937	0.564451	0.267521
			100	1	2741327	6109838	0.448674	0.555331
				2	13159704	28091549	0.468458	0.222025
			120	1	1719809	10138479	0.169632	0.209956
				2	11495213	20414056	0.563103	0.266882

## Sheet: Figure S3C
Figure S3C
	Condition		Timepoint	# of doublings	18S Tag	U2	18S Tag / U2
	NOY504	GPD::WT 18S	0	0	12990.7	26244.8	0.494982
			1	1	12632.3	29928	0.422089
			2	2.2	15606.3	33392.8	0.467355
			3	3.3	11724.7	21885.1	0.53574
			4	3.6	11517	17282.5	0.666397
			5	5.5	18514.5	9641.72	1.92024
			6	7.6	42782.1	19852.6	2.15499
			7	12.7	17667.9	26970.3	0.655088
		GPD::18S-2	0	0	834.163	24038.2	0.0347015
			1	1.2	1254.16	13783	0.0909934
			2	2.3	1546.23	23565.9	0.0656133
			3	3.1	743.335	10762.5	0.0690671
			4	3.4	933.92	13075.9	0.0714231
			5	4.8	1919.16	2257.65	0.850072
			6	6.5	21027.8	7606.63	2.76441
			7	11	36075.9	10662.3	3.38349
		Gal::WT 18S	0	0	19785.8	23298.1	0.849243
			1	0.8	22964.2	26441.4	0.868493
			2	2	20710.6	26880.6	0.770465
			3	3.1	19349.4	22412.6	0.863326
			4	3.6	17684	20280	0.871995
			5	6.7	27838.8	23565.1	1.18135
			6	7.9	29287.9	20294.3	1.44316
			7	11.1	45770.7	40282.2	1.13625
		Gal::18S-2	0	0	1851.66	11377.5	0.162748
			1	0.8	4221.36	13774	0.306473
			2	1.9	4904.16	17987	0.272651
			3	2.9	4836.33	18477.4	0.261743
			4	3.3	8678.74	21820	0.397742
			5	5.1	4502.69	2908.13	1.54831
			6	6.3	16458.7	4387.35	3.7514
			7	7.3	39114	8039.77	4.86506
