# Supplementary material for: The kinase Rio1 and a ribosome collision-dependent decay pathway survey the integrity of 18S rRNA cleavage
Source: PLoS Biol. 2024 Apr 25;22(4):e3001767. doi: 10.1371/journal.pbio.3001767 (PMC11045238; doi:10.1371/journal.pbio.3001767)
Supplement: S10 Data — (XLSX) [file pbio.3001767.s023.xlsx]

## Sheet: Figure S5A
Figure S5A
	Condition		Biological Replicate	20S Tag	U2	20S Tag/U2	Average	Standard Error of the Mean (SEM)
	BY4741	WT 18S (Gel 1)	1	0	26290.8	0	0	0
			2	0	24700.1	0
			3	0	23279.7	0
		WT 18S (Gel 2)	4	0	37644.9	0
			5	0	31614.2	0
			6	0	32441.6	0
		e.v. (Gel 1)	1	0	23861.9	0	0	0
			2	0	24548.3	0
			3	0	21389	0
		e.v. (Gel 2)	4	0	38354.4	0
			5	0	38105.6	0
		18S -1 (Gel 1)	1	0	24501.5	0	0	0
			2	0	22067.6	0
			3	0	20836	0
		18S -2 (Gel 1)	1	9881.27	19722.6	0.501013	0.444728	0.0130535
			2	6143.59	14527.3	0.422899
			3	6723.12	14519	0.463055
		18S -2 (Gel 2)	4	16059.7	36609.5	0.438675
			5	15708.3	37385.7	0.420167
			6	18655.1	44148	0.422557
		18S -3 (Gel 1)	1	7677.68	15506.7	0.495121	0.522837	0.0277163
			2	8649.9	15711.3	0.550553
		18S -4 (Gel 1)	1	9222.39	15825.7	0.582746	0.502645	0.0414052
			2	9037.73	18797.7	0.480789
			3	7936.92	17859.8	0.4444
	∆Asc1 + U24	WT 18S (Gel 1)	1	0	32600.1	0	0	0
			2	0	28780.2	0
			3	0	27346	0
		WT 18S (Gel 2)	4	0	50600.8	0
			5	0	50752.3	0
			6	0	44725.6	0
		e.v. (Gel 1)	1	0	41217.3	0	0	0
			2	0	34171.6	0
			3	0	43323.8	0
		e.v. (Gel 2)	4	0	53786.6	0
			5	0	50451.9	0
		18S -1 (Gel 1)	1	0	29311.4	0	0	0
			2	0	28031.3	0
			3	0	23400.1	0
		18S -2 (Gel 1)	1	12791.9	19904.4	0.642668	0.430309	0.10032
			2	10076.8	16187.9	0.622492
			3	9861.48	14189.6	0.694979
		18S -2 (Gel 2)	4	12587.7	55683.7	0.226057
			5	10160.4	52392.4	0.19393
			6	10018.4	49663	0.201728
		18S -3 (Gel 1)	1	11375.6	16042.8	0.709078	0.746475	0.0191384
			2	13248	17155.3	0.77224
			3	9213.65	12153.5	0.758107
		18S -4 (Gel 1)	1	14252.4	23293.9	0.61185	0.580121	0.022562
			2	13598.1	22968.1	0.592043
			3	16147.8	30100.2	0.53647
	∆Dom34	WT 18S (Gel 1)	1	0	24810.8	0	0	0
			2	0	32276.3	0
		WT 18S (Gel 2)	3	0	37735.6	0
			4	0	31991.1	0
			5	0	39794.2	0
		e.v. (Gel 1)	1	0	31695.9	0	0	0
			2	0	18431.9	0
			3	0	23628.8	0
		e.v. (Gel 2)	4	0	36398.3	0
			5	0	43534.6	0
		18S -1 (Gel 1)	1	0	23257	0	0	0
			2	0	26918.5	0
			3	0	41916.7	0
		18S -2 (Gel 1)	1	19152.4	26150.6	0.732388	0.572811	0.067193
			2	17516.6	26219.4	0.668079
			3	16891.2	22494.8	0.750893
		18S -2 (Gel 2)	4	15045	41599.9	0.36166
			5	13553.8	29164.5	0.464738
			6	14180	30885.9	0.459107
		18S -3 (Gel 1)	1	18356.1	25770.3	0.712296	0.832048	0.0602753
			2	22254.5	25291.4	0.879922
			3	23505.9	26004.3	0.903924
		18S -4 (Gel 1)	1	20066	19036.9	1.05406	0.875662	0.128835
			2	22142.8	23370.3	0.947477
			3	22416.3	35840.4	0.625448

## Sheet: Figure S5B
Figure S5B
							18S Tag/U2
	Condition		Biological Replicate	18S Tag	U2	18S Tag/U2	Average Cell Background + WT 18S	Relative to Cell Background + WT 18S	Average	Standard Error of the Mean (SEM)
	BY4741	WT 18S (Gel 1)	1	44297	26290.8	1.68488	1.66622	1.0112	1	0.0777816
			2	43062.8	24700.1	1.74343		1.04634
			3	36557.2	23279.7	1.57035		0.942462
		WT 18S (Gel 2)	4	46005.8	37644.9	1.2221	0.925201	1.3209
			5	21527.2	31614.2	0.680934		0.735984
			6	28307.7	32441.6	0.872573		0.943117
		e.v. (Gel 1)	1	0	23861.9	0		0	0	0
			2	0	24548.3	0		0
			3	0	21389	0		0
		e.v. (Gel 2)	4	0	38354.4	0		0
			5	0	38105.6	0		0
		18S -1 (Gel 1)	1	40829.2	24501.5	1.6664		1.00011	0.989891	0.0228949
			2	37631.3	22067.6	1.70527		1.02344
			3	32847	20836	1.57645		0.946127
		18S -2 (Gel 1)	1	4264.48	19722.6	0.216223		0.129769	0.162993	0.0176215
			2	2897.89	14527.3	0.199479		0.119719
			3	3337.43	14519	0.229865		0.137956
		18S -2 (Gel 2)	4	7737.55	36609.5	0.211354		0.228441
			5	6944.01	37385.7	0.18574		0.200756
			6	6589.08	44148	0.14925		0.161316
		18S -3 (Gel 1)	1	3324.43	15506.7	0.214387		0.128667	0.13901	0.0103434
			2	3909.84	15711.3	0.248855		0.149354
		18S -4 (Gel 1)	1	4075.2	15825.7	0.257505		0.154545	0.122948	0.0158021
			2	3374.84	18797.7	0.179535		0.10775
			3	3170.74	17859.8	0.177535		0.106549
	∆Asc1 + U24	WT 18S (Gel 1)	1	34184.4	32600.1	1.0486	1.13724	0.922052	1	0.0437209
			2	35368.3	28780.2	1.22891		1.08061
			3	31016.5	27346	1.13422		0.997343
		WT 18S (Gel 2)	4	30331.7	50600.8	0.599432	0.676244	0.886414
			5	40138.9	50752.3	0.790877		1.16952
			6	28553.8	44725.6	0.638422		0.944071
		e.v. (Gel 1)	1	0	41217.3	0		0	0	0
			2	0	34171.6	0		0
			3	0	43323.8	0		0
		e.v. (Gel 2)	4	0	53786.6	0		0
			5	0	50451.9	0		0
		18S -1 (Gel 1)	1	35290.4	29311.4	1.20398		1.05868	1.17698	0.155567
			2	31461.3	28031.3	1.12236		0.986915
			3	39527.5	23400.1	1.6892		1.48534
		18S -2 (Gel 1)	1	8440.42	19904.4	0.424049		0.372874	0.31562	0.0304194
			2	6529.42	16187.9	0.403352		0.354675
			3	6708.73	14189.6	0.472792		0.415734
		18S -2 (Gel 2)	4	9556.98	55683.7	0.17163		0.253799
			5	8615.45	52392.4	0.164441		0.243168
			6	8512.57	49663	0.171407		0.253469
		18S -3 (Gel 1)	1	7209.32	16042.8	0.44938		0.395148	0.385449	0.00705406
			2	7252.32	17155.3	0.422744		0.371727
			3	5383.07	12153.5	0.442924		0.389471
		18S -4 (Gel 1)	1	9240.85	23293.9	0.396707		0.348832	0.321685	0.0142883
			2	8249.9	22968.1	0.359189		0.315841
			3	10282.4	30100.2	0.341607		0.300382
	∆Dom34	WT 18S (Gel 1)	1	38227.2	24810.8	1.54075	1.25832	1.22445	1	0.0716852
			2	31498.2	32276.3	0.975892		0.775553
		WT 18S (Gel 2)	3	37163.7	37735.6	0.984845	1.00553	0.979427
			4	31651.8	31991.1	0.989393		0.98395
			5	41479.7	39794.2	1.04236		1.03662
		e.v. (Gel 1)	1	0	31695.9	0		0	0	0
			2	0	18431.9	0		0
			3	0	23628.8	0		0
		e.v. (Gel 2)	4	0	36398.3	0		0
			5	0	43534.6	0		0
		18S -1 (Gel 1)	1	31017.8	23257	1.3337		1.0599	0.951079	0.121676
			2	36756.9	26918.5	1.36549		1.08517
			3	37351.9	41916.7	0.891097		0.708165
		18S -2 (Gel 1)	1	7042.76	26150.6	0.269315		0.214028	0.189142	0.0108421
			2	5050.2	26219.4	0.192613		0.153072
			3	5025.1	22494.8	0.22339		0.17753
		18S -2 (Gel 2)	4	7006.2	41599.9	0.168419		0.167492
			5	6118.67	29164.5	0.209799		0.208645
			6	6648.84	30885.9	0.215271		0.214086
		18S -3 (Gel 1)	1	5033.81	25770.3	0.195334		0.155234	0.156648	0.00472777
			2	4750.1	25291.4	0.187815		0.149258
			3	5413.86	26004.3	0.208191		0.165452
		18S -4 (Gel 1)	1	6531.59	19036.9	0.343102		0.272667	0.21951	0.0349924
			2	6832.93	23370.3	0.292377		0.232355
			3	6923.05	35840.4	0.193163		0.153509

## Sheet: Figure S5C
Figure S5C (Left)
	Condition		Biological Replicate	18S Tag	U2	18S Tag/U2	18S Tag / U2 relative to WT 18S	Average	Standard Error of the Mean (SEM)
	Rps20 WT	18S WT	1	10990731	7036409	1.56198	0.909628	1	0.208215
			2		6038628
			3	7634598	3182044	2.39927	1.39723
			4	4835429	4062574	1.19024	0.693141
		18S-4	1	22596451	6224141	3.63045	2.11421	1.8309	0.33458
			2	18787946	4170689	4.50476	2.62337
			3	21363369	8515920	2.50864	1.46092
			4	58001158	30021790	1.93197	1.12509
	Rps20 K6K8R	18S WT	1		6397246			1	0.258943
			2	2891145	5869423	0.492577	0.491431
			3	16454169	14035478	1.17233	1.1696
			4	8495406	6329957	1.3421	1.33897
		18S-4	1	13906201	9017600	1.54212	1.53853	1.60503	0.614327
			2	1420821	20006126	0.071019	0.070854
			3	4627320	2655527	1.74252	1.73847
			4	15447362	5016260	3.07946	3.07229
Figure S5C (Left-Middle)
	Condition		Biological Replicate	18S Tag	U2	18S Tag/U2	Average	Standard Error of the Mean (SEM)
	Rps3	WT 18S	1	57443.7	16130.5	3.56118	3.68046	0.382351
			2	65782.1	14970	4.39425
			3	53584.6	17364	3.08596
		e.v.	1	0	15985	0	0	0
			2	0	14504.4	0
			3	0	12554.3	0
		18S -1	1	60188.4	16905.9	3.56021	3.99523	0.310338
			2	52229.3	11363.7	4.59614
			3	54044.6	14113.3	3.82934
		18S -2	1	5992.69	16787.2	0.356979	0.244027	0.0636809
			2	4663.31	19551.6	0.238513
			3	2058.7	15072.3	0.136589
		18S -3	1	4234.15	16683.4	0.253794	0.16582	0.0454748
			2	2437.84	23935.8	0.101849
			3	2756.89	19439.6	0.141818
		18S -4	1	3144.48	22242.3	0.141374	0.226086	0.0472305
			2	5873.18	25288.3	0.232248
			3	6152.57	20196.4	0.304636
	Rps3-K212R	WT 18S	1	42952.7	13690.5	3.13741	3.36769	0.488277
			2	61930.3	14386.7	4.3047
			3	38106.2	14320.4	2.66097
		e.v.	1	0	13154.5	0	0	0
			2	0	11616.3	0
			3	0	13809.6	0
		18S -1	1	36032.4	14476.9	2.48896	2.73647	0.214039
			2	46601.3	14734.7	3.1627
			3	38081	14888.5	2.55775
		18S -2	1	3047.84	14385.3	0.211872	0.188504	0.0233684
			2	2103.53	12738.2	0.165135
		18S -3	1	2332.01	17107	0.136319	0.1697	0.0258704
			2	2634.23	11939.8	0.220627
			3	2434.89	16002.7	0.152155
		18S -4	1	3393.43	19330.3	0.17555	0.180972	0.00902205
			2	2663.06	15778.4	0.168779
			3	3224.55	16237.4	0.198588
Figure S5C (Right-Middle)
	Condition		Biological Replicate	18S Tag	U2	18S Tag/U2	18S Tag / U2 relative to WT 18S	Average	Standard Error of the Mean (SEM)
	BY4741	18S WT	1	13600587	23793507	0.571609	0.410899	1	0.589101
			2	31985113	14468785	2.21063	1.5891
			3
		18S-4	1	6723546	11875773	0.566156	0.406979	0.466066	0.09214
			2	10018169	11134498	0.899741	0.646775
			3	13288959	27733667	0.479163	0.344445
	dCue2	18S WT	1	30219292	9487632	3.18513	1.01953	1	0.019533
			2
			3	62834279	20513427	3.06308	0.980467
		18S-4	1	11343614	11045961	1.02695	0.328717	0.220162	0.057676
			2	5507123	13344240	0.412697	0.132101
			3	12415044	19902838	0.623783	0.199668
Figure S5C (Right)
	Condition		Biological Replicate	18S Tag	U2	18S Tag/U2	18S Tag / U2 relative to WT 18S	Average	Standard Error of the Mean (SEM)
	BY4741	18S WT	1	43084190	21163173	2.03581	1.27508	1	0.057973
			2	23436532	20350862	1.15162	0.72129
			3	33113355	20664677	1.60241	1.00363
			4	24773531	16036933	1.54478	1.03983
			5	14349235	8813664	1.62807	1.09589
			6	17248907	13434005	1.28397	0.864276
			7	18804949	8098874	2.32192	1.18894
			8	32478307	17329095	1.87421	0.959692
			9	46053853	27699117	1.66265	0.851362
		18S-4	1	12804871	34222921	0.374161	0.234346	0.165148	0.026771
			2	14595956	33595001	0.434468	0.272118
			3
			4	2205442	18173316	0.121356	0.081688
			5	3750003	16959317	0.221118	0.14884
			6	1594691	5446067	0.292815	0.197101
			7	5412484	37210176	0.145457	0.074482
			8	5418634	28901303	0.187488	0.096003
			9	8277203	19566980	0.423019	0.216608
	dRqt2	18S WT	1					1	0.153517
			2
			3
			4	39934259	12997334	3.0725	1.43765
			5	42980424	19314805	2.22526	1.04122
			6	37521013	33688758	1.11376	0.521135
			7	41674479	19393377	2.1489	1.03714
			8	43844242	15591616	2.81204	1.3572
			9	42649678	33986710	1.25489	0.605659
		18S-4	1					0.402001	0.112324
			2
			3
			4	-2058559	18266944	-0.11269	-0.05273
			5	16063770	14614070	1.0992	0.514325
			6	-1822073	32755864	-0.05563	-0.02603
			7	-5703013	27677184	-0.20605	-0.09945
			8	14638536	24389668	0.600194	0.289677
			9	-3418567	25890906	-0.13204	-0.06373
	dRqt3	18S WT	1	55854428	40865709	1.36678	0.875047	1	0.055319
			2	38965237	22033846	1.76843	1.13219
			3	54283518	35007087	1.55064	0.992761
			4	31012605	25180969	1.23159	0.8874
			5	34986333	28856532	1.21242	0.87359
			6	47887161	27848254	1.71958	1.23901
			7	25488706	4191931	6.08042	0.750746
			8	29290975	3042329	9.62781	1.18874
			9	39459801	4594073	8.58928	1.06051
		18S-4	1	13706102	27971533	0.490002	0.313712	0.230512	0.041219
			2	21967897	39929403	0.550168	0.352232
			3	8586055	42413806	0.202435	0.129604
			4	14019224	22587691	0.620658	0.447204
			5	9831683	27264348	0.360606	0.259828
			6	4454456	45210462	0.098527	0.070992
			7	11741757	7432818	1.57972	0.195047
			8	7929708	4970561	1.59533	0.196975
			9	4050319	4587504	0.882903	0.109011
	dRqt4	18S WT	1	10909562	16703489	0.653131	0.698476	1	0.076101
			2	14454521	18023878	0.801965	0.857644
			3	24000849	17776545	1.35014	1.44388
			4	29083167	29501736	0.985812	0.861051
			5	25491708	25041978	1.01796	0.88913
			6	21897056	15302895	1.43091	1.24982
			7	33095907	6002585	5.51361	0.947304
			8	30889034	5565568	5.55002	0.953561
			9	32134364	5023108	6.39731	1.09913
		18S-4	1	3875759	11407369	0.339759	0.363348	0.247074	0.027942
			2	6792672	19886764	0.341567	0.365282
			3
			4	6197857	21487200	0.288444	0.25194
			5	4199355	15755046	0.26654	0.232808
			6	9653825	50059801	0.192846	0.16844
			7	10119224	7933734	1.27547	0.219141
			8	9821652	7685373	1.27797	0.21957
			9	16952739	18663923	0.908316	0.15606

## Sheet: Figure S5D
Figure S5D
			Doubling Times (min)							Doubling Times Normalized to WT 18S per day
			BY4741							BY4741
	Day Grown On	Biological Replicate	WT 18S	e.v.	18S -1	18S -2	18S -3	18S -4		WT 18S	e.v.	18S -1	18S -2	18S -3	18S -4
	1	1	104.65	111.2	111.2	113.45	111.35	105.75		0.967265	1.02781	1.02781	1.0486	1.02919	0.977432
		2	109.15	108.55	109	112.75	107.1	110.3		1.00886	1.00331	1.00747	1.04213	0.98991	1.01949
		3	112.2	106.2	110.55	110.15	110.75	110.7		1.03705	0.981591	1.0218	1.0181	1.02365	1.02318
		4	104.1	104.95	108.5	111.85	112.1	112.95		0.962181	0.970038	1.00285	1.03381	1.03612	1.04398
		5	109.45	110.55	109.25	114.6	115.65	113.55		1.01163	1.0218	1.00978	1.05923	1.06894	1.04953
		6	107.6	109.35	111.15	116.1	114.35	115.25		0.994531	1.01071	1.02734	1.0731	1.05692	1.06524
		7	108.35	108.25	109.9	107.4	105.6	106.9		1.00146	1.00054	1.01579	0.992683	0.976046	0.988061
		8	108.3	103.85	109.25	112.55	111.95	111.3		1.001	0.959871	1.00978	1.04028	1.03474	1.02873
		9	110.4	107.6	108.7	111.2	119.95	110.65		1.02041	0.994531	1.0047	1.02781	1.10868	1.02272
		10	107.7	106.25	107.05	108.55	111.15	107.95		0.995456	0.982053	0.989448	1.00331	1.02734	0.997766
		11	107.95	109.2	110.6	107.85	113.05	110.1		0.997766	1.00932	1.02226	0.996842	1.0449	1.01764
		12	108.45	107.05	110.25	109.25	108.3	109.5		1.00239	0.989448	1.01902	1.00978	1.001	1.01209
		Daily Average	108.192
	2	1	116.35	114.9		120.65				1.00248	0.989984		1.03953
		2	115.25	113.35		120				0.992999	0.976629		1.03393
		3	115.15			120.6				0.992138			1.0391
		4	117.5			120.8				1.01239			1.04082
		Daily Average	116.062
									Average	1	0.994116	1.01317	1.03119	1.03312	1.02049
									Standard Error of the Mean (SEM)	0.00449051	0.0052063	0.00326801	0.00554072	0.0103	0.00727134
			Doubling Times (min)							Doubling Times Normalized to WT 18S per day
			∆Asc1 + U24							∆Asc1 + U24
	Day Grown On	Biological Replicate	WT 18S	e.v.	18S -1	18S -2	18S -3	18S -4		WT 18S	e.v.	18S -1	18S -2	18S -3	18S -4
	1	1	123.95	124.1	124.6	127.7	127.75	128		0.994451	0.995654	0.999666	1.02454	1.02494	1.02694
		2	126	124.95	124.85	134.9	132.35	133.2		1.0109	1.00247	1.00167	1.0823	1.06184	1.06866
		3	123.5	121.55	126.8	129.95	127.95	132.25		0.99084	0.975196	1.01732	1.04259	1.02654	1.06104
		4	126.2	124.95	125	132.55	133.75	135.3		1.0125	1.00247	1.00287	1.06345	1.07308	1.08551
		5	125.5	124.25	125.95	130.95	134.45	133.75		1.00689	0.996858	1.0105	1.05061	1.07869	1.07308
		6	122.7	125.3	126.65	134.7	133.5	129.55		0.984422	1.00528	1.01611	1.0807	1.07107	1.03938
		Daily Average	124.642
	2	1	137.5	141.75	136.6	145.8	138.65	141.15		1.00591	1.03701	0.999329	1.06663	1.01433	1.03262
		2	139.15	135.1	136.45	145.9	145.65	141.55		1.01798	0.988356	0.998232	1.06737	1.06554	1.03554
		3	138.55	137.8	135.8	145.75	156.65	144.6		1.0136	1.00811	0.993477	1.06627	1.14601	1.05786
		4	133.7	132.55	148.3	156.15	148.15			0.978114	0.969701	1.08492	1.14235	1.08383
		5	134.85	152.05	142.25	162.75	162.9	154.85		0.986527	1.11236	1.04066	1.19064	1.19173	1.13284
		6	136.4	138.45	131.6	150.05	160.95	145.6		0.997866	1.01286	0.962751	1.09773	1.17747	1.06517
		Daily Average	136.692
	3	1	131.3	135.75		132.85				0.985828	1.01924		0.997466
		2	134.05	132.5		136.2				1.00648	0.994838		1.02262
		3	135.25			135.65				1.01549			1.01849
		4	132.15			135.35				0.99221			1.01624
		Daily Average	133.188
	4	1	131.15	130.55		135.45				1.01996	1.01529		1.0534
		2	124	135.65		138.65				0.964355	1.05496		1.07829
		3	130.6			133.4				1.01568			1.03746
		Daily Average	128.583
									Average	1	1.01192	1.01063	1.06311	1.08459	1.06169
									Standard Error of the Mean (SEM)	0.00356495	0.00850044	0.00853912	0.0104913	0.0167364	0.00908024
			Doubling Times (min)							Doubling Times Normalized to WT 18S per day
			∆Dom34							∆Dom34
	Day Grown On	Biological Replicate	WT 18S	e.v.	18S -1	18S -2	18S -3	18S -4		WT 18S	e.v.	18S -1	18S -2	18S -3	18S -4
	1	1	107.2	109.6	113.6	118.3	124.05	109.25		0.965331	0.986943	1.02296	1.06529	1.11706	0.983791
		2	110.35	111.2	113.7	127.6	122.65	120.6		0.993697	1.00135	1.02386	1.14903	1.10446	1.086
		3	114.6	114.15	106.45	125.7	120.25	119.75		1.03197	1.02792	0.958577	1.13192	1.08285	1.07834
		4	107.2	111.35	114.05	125.15	123.3	119.4		0.965331	1.0027	1.02701	1.12697	1.11031	1.07519
		5	116.3	118.75	118	122.25	122.45	120.4		1.04728	1.06934	1.06258	1.10086	1.10266	1.0842
		6	110.65	112.1	118.5	126.8	121.45	129.05		0.996398	1.00946	1.06709	1.14183	1.09365	1.16209
		Daily Average	111.05
	2	1	124.55	120.05	123.75	127.6	153.95	127.7		1.00477	0.968471	0.998319	1.02938	1.24195	1.03018
		2	124.5	120.8	124.25	128.9	128.6	127.7		1.00437	0.974521	1.00235	1.03987	1.03745	1.03018
		3	124.3	126.4	114.95	128.2	131.75	126.5		1.00276	1.0197	0.927328	1.03422	1.06286	1.0205
		4	125.05	123.95	124.75	127.5	131.95	130		1.00881	0.999933	1.00639	1.02857	1.06447	1.04874
		5	122.5	121.85	124.95	128	128.8	129.75		0.988235	0.982992	1.008	1.03261	1.03906	1.04672
		6	122.85	125.3	126.4	129.6	132.95	131.95		0.991059	1.01082	1.0197	1.04551	1.07254	1.06447
		Daily Average	123.958
	3	1	124.55	124.95		129.25				1.00565	1.00888		1.0436
		2	125.25	125.5		134.6				1.0113	1.01332		1.0868
		3	121.75			132.4				0.983044			1.06904
		Daily Average	123.85
									Average	1	1.00545	1.01035	1.07503	1.09411	1.0592
									Standard Error of the Mean (SEM)	0.00556612	0.00668516	0.0111659	0.0114669	0.0154516	0.0128251

## Sheet: Figure S5E
Figure S5E (Left)
					Doubling Times (min)		Doubling Times Normalized to WT 18S per day	Doubling Times Normalized to Rps20 WT	Doubling Times (min)		Doubling Times Normalized to WT 18S per day	Doubling Times Normalized to Rps20 WT
					Rps20 WT				Rps20 K6K8R
			Day Grown On	Biological Replicate	WT 18S	18S -4	18S -4	18S -4	WT 18S	18S -4	18S -4	18S -4
			1	1	98.47	110	1.03362	0.918089		129.8	0.962016	0.854485
				2	99.06	112.9	1.06087	0.942293	134	109.2	0.809339	0.718874
				3	104.7	120.2	1.12947	1.00322	127	109.3	0.81008	0.719532
				4	114.2	120.1	1.12853	1.00239	136.4	122.9	0.910876	0.809061
				5	115.3	126.9	1.19243	1.05914	142.3	125.5	0.930146	0.826177
				6	106.8	134.3	1.26196	1.1209
				Daily Average	106.422				134.925
			2	1	105.5					148.1	1.06983	0.950247
				2	107					145.5	1.05105	0.933565
				3	128.4	135.4	1.13985	1.01244	133.3	123.1	0.889237	0.789841
				4	135.6	143.3	1.20636	1.07151	143.7	128.4	0.927522	0.823847
				5	110.4	143	1.20383	1.06927	123.9	150.3	1.08572	0.964363
				6	109.1	144.6	1.2173	1.08123	129.9	147.2	1.06333	0.944473
				7	128.5	140.3	1.1811	1.04908	148.8	143.8	1.03877	0.922657
				8	125.8	140.4	1.18194	1.04983	151	151.6	1.09511	0.972704
				Daily Average	118.787				138.433
			3	1	137.6	140	1.11155	0.987306	112.9	133.8	1.13342	1.00673
				2	111.2	133.9	1.06312	0.944288	109.7	135.7	1.14951	1.02102
				3	139.9	131	1.04009	0.923837	118.9	130.9	1.10885	0.984908
				4	120.3	128.8	1.02263	0.908322	124.4	129	1.09276	0.970612
				5	119.5	130.6	1.03692	0.921016	118.7	136.1	1.1529	1.02403
				6	127.2	132.7	1.05359	0.935826	123.7	141.8	1.20119	1.06692
				Daily Average	125.95				118.05
						Average		1				0.91074
						Standard Error of the Mean (SEM)		0.01592				0.023815
Figure S5E (Middle left)
					Doubling Times (min)						Doubling Times (min)
					Rps3						Rps3-K212R
			Day Grown On	Biological Replicate	WT 18S	e.v.	18S -1	18S -2	18S -3	18S -4	WT 18S	e.v.	18S -1	18S -2	18S -3	18S -4
			1	1	74.52	70.875	70.32	71.4	68.06	73.05	78.895	73.595	69.095	72.815	77.875	78.365
				2	70.06	80.565	68.905	73.895	68.08	73.16	70.885	79.855	73.6	83.28	77.975	82.575
				3	67.965	77.375	67.65	72.125	66.55	67.66	72.025	78.605	72.71	83.33	73.815	78.8
				4	72.66				68.9	71.085	74.55				76.28	81.39
				Daily Average	71.3012
			2	1	95.6	89.17	95.195	92.205	94.225	82.245	106.95	97.295	98.3	105.9	101.6	103.8
				2	93.33	87.215	91.925	95.74	87.325	88.79	105.6	95.295	98.31	102.7	120.4	103.05
				3		86.37	94.36	84.275	82.65	93.85	102.65	101.975	103.25	110.2	102.9	90.455
				Daily Average	94.465
			3	1	65.16	58.875	71.105	57.245	65.67	56.635	62.405	59.11	63.475	66.075	72.68	76.96
				2	59.26	57.235	60.16	69.195	56.42	56.98	61.145	59.85	65.385	72.415	65.255	66.43
				3	58.01	64.07	56.875	66.005	66.58	64.215	76.07	61.225	74.47	66.61	73.7	64.745
				Daily Average	60.81
					Doubling Times (min)						Doubling Times (min)
					Rps3						Rps3-K212R
			Day Grown On	Biological Replicate	WT 18S	e.v.	18S -1	18S -2	18S -3	18S -4	WT 18S	e.v.	18S -1	18S -2	18S -3	18S -4
			1	1	1.04514	0.99402	0.98624	1.00138	0.95454	1.02453	1.06487	0.99334	0.9326	0.98281	1.0511	1.05772
				2	0.98259	1.12992	0.96639	1.03638	0.95482	1.02607	0.95676	1.07783	0.9934	1.12406	1.05245	1.11454
				3	0.95321	1.08518	0.94879	1.01155	0.93336	0.94893	0.97214	1.06096	0.98139	1.12473	0.99631	1.06359
				4	1.01906				0.96632	0.99697	1.00623				1.02958	1.09855
			2	1	1.01202	0.943947	1.00773	0.976076	0.997459	0.87064	1.01792	0.926031	0.935596	1.00793	0.967005	0.987944
				2	0.987985	0.923252	0.973112	1.0135	0.924416	0.939925	1.00508	0.906996	0.935692	0.977475	1.14594	0.980806
				3		0.914307	0.998888	0.892129	0.874927	0.99349	0.976999	0.970574	0.982709	1.04886	0.979378	0.86093
			3	1	1.07153	0.96818	1.1693	0.941375	1.07992	0.931344	0.937857	0.888338	0.953937	0.993012	1.09228	1.1566
				2	0.974511	0.94121	0.989311	1.13789	0.927808	0.937017	0.918921	0.899459	0.982642	1.08829	0.980688	0.998347
				3	0.953955	1.05361	0.93529	1.08543	1.09489	1.05599	1.14322	0.920123	1.11918	1.00105	1.1076	0.973024
				Average	1	0.994847	0.997227	1.01063	0.970846	0.972491	1	0.960406	0.979682	1.03869	1.04023	1.0292
				Standard Error of the Mean (SEM)	0.013473	0.025726	0.022858	0.024319	0.021896	0.017805	0.020741	0.023468	0.019158	0.019921	0.019248	0.027241
Figure S5E (Middle right)
					Doubling Times (min)		Doubling Times Normalized to WT 18S per day	Doubling Times Normalized to BY4741	Doubling Times (min)		Doubling Times Normalized to WT 18S per day	Doubling Times Normalized to BY4741
					BY4741				dCue2
			Day Grown On	Biological Replicate	WT 18S	18S -4	18S -4	18S -4	WT 18S	18S -4	18S -4	18S -4
			1	1	110.8	122.3	1.05872	0.955336	131.2	147.6	1.19337	1.07683
				2	111.6	131.5	1.13836	1.0272	131.3	144.9	1.17154	1.05714
				3	117.1	130.7	1.13144	1.02095	110.1	143.4	1.15941	1.04619
				4	120.2	125.6	1.08729	0.981113	108.5	137.1	1.10848	1.00023
				5	112.2	129	1.11672	1.00767	134.7	147.6	1.19337	1.07683
				6	121.2	123.6	1.06997	0.96549	126.3	142.4	1.15133	1.0389
				Daily Average	115.517				123.683
			2	1	126.6	134.5	1.07744	0.972223	130.3
				2		134.1	1.07423	0.969331	123.3	139.4	1.10825	1.00003
				3	123.3	131.7	1.05501	0.951984	111.8	143.8	1.14324	1.0316
				4	124.6	138.4	1.10868	1.00041	109.1	145.9	1.15993	1.04666
				5		147	1.17757	1.06258	140.1	154.3	1.22671	1.10692
				6		150.2	1.2032	1.08571	140.1
				Daily Average	124.833				125.783
						Average		1				1.04813
						Standard Error of the Mean (SEM)		0.012328				0.010624
Figure S5E (Right)
					Doubling Times (min)		Doubling Times Normalized to WT 18S per day	Doubling Times Normalized to BY4741	Doubling Times (min)		Doubling Times Normalized to WT 18S per day	Doubling Times Normalized to BY4741	Doubling Times (min)		Doubling Times Normalized to WT 18S per day	Doubling Times Normalized to BY4741	Doubling Times (min)		Doubling Times Normalized to WT 18S per day	Doubling Times Normalized to BY4741
					BY4741				dRqt2				dRqt3				dRqt4
			Day Grown On	Biological Replicate	WT 18S	18S -4	18S -4	18S -4	WT 18S	18S -4	18S -4	18S -4	WT 18S	18S -4	18S -4	18S -4	WT 18S	18S -4	18S -4	18S -4
			1	1	137.4								154.6	170.9	1.08565	0.980988	158.2	170.4	1.00117	0.904654
				2	144.1								158.9				156	174	1.02233	0.923767
				3	121.9	152.7	1.11068	1.0036					162	196.2	1.24637	1.12621	178.6	180.1	1.05817	0.956151
				4	122	151.5	1.10195	0.995715					168.2	186.2	1.18285	1.06881	187.8	184.1	1.08167	0.977388
				5	146	161.3	1.17323	1.06012					144.8	203.3	1.29148	1.16697	167	191.3	1.12397	1.01561
				6	153.5	186.8	1.35871	1.22772					156	193.2	1.22732	1.10899	173.6	170.2	1	0.903592
				Daily Average	137.483								157.417				170.2
			2	1	106.3	103.9	0.952774	0.860919	128.5				128.3	148.9	1.09566	0.990029	133	170.8	1.20878	1.09224
				2	121.8	102	0.935351	0.845176	133.3				132.9	151.4	1.11405	1.00665	141.2	158.7	1.12314	1.01486
				3	105.1	120.2	1.10225	0.995982	131.5	124.9	0.937336	0.846969	126.1	163	1.19941	1.08378	152.6	155.5	1.1005	0.994399
				4	104.9	121.1	1.1105	1.00344	131.6	124.5	0.934334	0.844257	127.5	164.3	1.20898	1.09242	144.7	155.1	1.09766	0.991841
				5	107.6	130.3	1.19487	1.07967	134.6				152.5	155	1.14054	1.03059	143.3	153.4	1.08563	0.980969
				6	108.6	135.4	1.24163	1.12193	140				148.1	158	1.16262	1.05053	133	153.8	1.08846	0.983527
				Daily Average	109.05				133.25				135.9				141.3
			3	1	105.9				131.2	117.2	0.883062	0.797928		140	1.10214	0.99589	142.1	147.5	1.02788	0.92878
				2	104				133.3	118.8	0.895118	0.808822	133.7				141	160.7	1.11986	1.0119
				3	101.1	113.7	1.03915	0.938965	130.9	130.9	0.986287	0.891201	122.1	170.8	1.34462	1.21498	154.2	155.9	1.08641	0.981672
				4	105.9	113.8	1.04006	0.939791	128.9	132.5	0.998342	0.902094	117.5	166.3	1.30919	1.18298	141.9	161.6	1.12613	1.01756
				5	122	126	1.15156	1.04054						160.5	1.26353	1.14172	138.3	165.7	1.1547	1.04338
				6	117.6	128.5	1.17441	1.06119	139.3				134.8	158.5	1.24779	1.12749		144.3	1.00558	0.90863
				Daily Average	109.417				132.72				127.025				143.5
			4	1	131.9	144.1	1.06846	0.965455	132.9	162.1	1.17393	1.06075	140.1					169.5	1.13151	1.02242
				2	137.1	149	1.10479	0.998284	136	153.8	1.11382	1.00644	137.9
				3	134.2	139.3	1.03287	0.933295	139.2				151	126.8	0.868691	0.784942		155.4	1.03738	0.937371
				4	134.1	138.7	1.02842	0.929275	142.3				149.1	128.8	0.882393	0.797323		169.4	1.13084	1.02182
				5	133.5	142	1.05289	0.951385	141.1	160.6	1.16307	1.05094	150.7	139.8	0.957753	0.865418
				6	138.4	136.8	1.01433	0.916545	137	160.6	1.16307	1.05094	147	149.3	1.02284	0.924227	149.8	171.1	1.14219	1.03207
				Daily Average	134.867				138.083				145.967				149.8
			5	1	127.3	139.8	1.10021	0.994141	128.1	140.5	1.0472	0.946246	148.4				129	149.7	1.10684	1.00013
				2	134.2	149.9	1.1797	1.06596	123.5	144.1	1.07404	0.970491	133.7				133.9
				3	129.4	140.7	1.10729	1.00054	139.4	159.3	1.18733	1.07286	147.2	127.5	0.888502	0.802843	146.2	130	0.961183	0.868517
				4	122.2	143.2	1.12697	1.01832	138.8	168.9	1.25888	1.13752	155	123.2	0.858537	0.775767	131.9	131.3	0.970795	0.877203
				5	121.8	128.7	1.01285	0.915207	134.1	145.5	1.08447	0.97992	141.2	140.4	0.978397	0.884072	137.5	156.5	1.15712	1.04556
				6	127.5	135.4	1.06558	0.962851	141.1	151.5	1.12919	1.02033	135.5	138.2	0.963066	0.870219	133	144.2	1.06617	0.963386
				Daily Average	127.067				134.167				143.5				135.25
			6	1	116.8	128.7	1.1122	1.00497	116.4				124.8				127.7	139.7	1.09928	0.9933
				2	114.2	122.1	1.05516	0.953437					127.6				124.5	128	1.00721	0.91011
				3	117.2	130.2	1.12516	1.01669	123.7	137	1.13769	1.028	128.6	115.6	0.906382	0.819	128.2	113.3	0.891541	0.805589
				4	114.9	127.6	1.10269	0.996385	123.7	133.4	1.10779	1.00099	128.7	118.4	0.928336	0.838837	125.6	111.6	0.878164	0.793502
				5	118.2	128.9	1.11393	1.00654	115.7	134.4	1.11609	1.00849		135.5	1.06241	0.959987	128.4	145.8	1.14728	1.03667
				6	113	134.9	1.16578	1.05339	122.6	130.2	1.08122	0.976978	128	133.5	1.04673	0.945817	128.1	145.3	1.14334	1.03312
				Daily Average	115.717				120.42				127.54				127.083
			7	1	126.1	136	1.14976	1.03891	109.5	138.2	1.17318	1.06007					138.2	133.9	1.02694	0.927934
				2	131.1	133.7	1.13031	1.02134	112.3	139	1.17997	1.06621					139	133.1	1.0208	0.92239
				3	130.8				122.1	114.9	0.975382	0.881347					114.9	124.6	0.955613	0.863484
				4		132.7	1.12186	1.0137	129	114.7	0.973684	0.879813					114.7
				5	118.2				122.6	133.8	1.13582	1.02632					133.8	138.7	1.06375	0.961198
				6	123.3	136	1.14976	1.03891	127.3	129.9	1.10272	0.996405					129.9	142.5	1.0929	0.987532
				7	97.5	130.5	1.10326	0.996898	107.1	134.7	1.14346	1.03322					134.7	139.5	1.06989	0.966742
				8	101	135.2	1.14299	1.0328	112.5	137.9	1.17063	1.05777					137.9	135.8	1.04151	0.941101
				Daily Average	118.286				117.8								130.387
							Average	1				0.97869				0.98705				0.96355
							Standard Error of the Mean (SEM)	0.011195				0.016846				0.025334				0.01038
