# Supplementary material for: The kinase Rio1 and a ribosome collision-dependent decay pathway survey the integrity of 18S rRNA cleavage
Source: PLoS Biol. 2024 Apr 25;22(4):e3001767. doi: 10.1371/journal.pbio.3001767 (PMC11045238; doi:10.1371/journal.pbio.3001767)
Supplement: S11 Data — (XLSX) [file pbio.3001767.s024.xlsx]

## Sheet: Figure S7B
Figure S7B (Left)
			Read Depth									Read Depth											Read Depth as a Fraction of Aligned Reads											Read Depth as a Fraction of Aligned Reads
			Gal::Pno1; Gal::Dim1 + Dim1-E85A + Pno1									Gal::Pno1; Gal::Dim1 + Dim1-E85A + Pno1-KKKF											Gal::Pno1; Gal::Dim1 + Dim1-E85A + Pno1											Gal::Pno1; Gal::Dim1 + Dim1-E85A + Pno1-KKKF
		Nucleotide Position	1	2	3	4	5	6	7	8		1	2	3	4	5	6	7	8			Nucleotide Position	1	2	3	4	5	6	7	8	Average	Standard Error of the Mean (SEM)		1	2	3	4	5	6	7	8	Average	Standard Error of the Mean (SEM)
	5' ITS1	1801	12007	4287	4864	4674	2705	2569	2576	2456		7696	6222	4952	5168	2930	2498	2971	2744		5' ITS1	1801	0.00421662	0.00161836	0.00185979	0.00128415	0.000713826	0.000831775	0.000743049	0.000779157	0.00150584	0.000416769		0.0027994	0.00236279	0.00187853	0.00176487	0.000669916	0.000809242	0.00109176	0.000943894	0.00154005	0.000276314
		1802	10274	3492	4202	3561	1789	2025	1761	1779		6627	5239	4017	4272	1905	1872	2388	2040			1802	0.00360803	0.00131824	0.00160667	0.000978358	0.000472101	0.000655642	0.000507962	0.000564381	0.00121392	0.000371642		0.00241056	0.0019895	0.00152384	0.00145889	0.00043556	0.000606446	0.000877523	0.000701729	0.0012505	0.00025104
		1803	9173	3202	3898	2948	1485	1940	1603	1627		5860	4646	3407	3579	1650	1762	2230	1896			1803	0.00322138	0.00120877	0.00149043	0.000809941	0.000391878	0.000628122	0.000462387	0.00051616	0.00109113	0.000333261		0.00213156	0.00176431	0.00129243	0.00122223	0.000377257	0.000570811	0.000819462	0.000652195	0.00110378	0.000217079
		1804	7850	2859	3520	2266	1143	1788	1400	1454		5097	4158	2945	3048	1396	1630	2099	1742			1804	0.00275676	0.00107928	0.0013459	0.000622566	0.000301628	0.000578908	0.000403831	0.000461276	0.000943769	0.000287849		0.00185402	0.00157899	0.00111718	0.00104089	0.000319182	0.000528048	0.000771323	0.000599221	0.000976107	0.000187778
		1805	5834	2316	2940	1476	821	1708	1310	1366		3765	3002	2079	1986	1002	1552	2015	1644			1805	0.00204879	0.000874299	0.00112413	0.00040552	0.000216655	0.000553006	0.000377871	0.000433359	0.000754203	0.00021225		0.00136951	0.00114	0.000788662	0.000678218	0.000229098	0.00050278	0.000740456	0.000565511	0.00075178	0.000127413
		1806	4472	2071	2612	1075	622	1646	1253	1314		3072	2355	1615	1444	803	1519	1958	1597			1806	0.00157048	0.000781811	0.000998718	0.000295348	0.00016414	0.000532932	0.000361429	0.000416862	0.000640215	0.00016359		0.00111743	0.000894306	0.000612645	0.000493125	0.000183598	0.000492089	0.00071951	0.000549344	0.000632756	9.99318e-05
		1807	3450	1867	2396	811	550	1609	1204	1281		2468	1804	1296	1047	667	1482	1924	1559			1807	0.00121157	0.0007048	0.000916128	0.000222816	0.00014514	0.000520952	0.000347295	0.000406393	0.000559387	0.000128765		0.00089773	0.000685065	0.000491634	0.00035755	0.000152503	0.000480103	0.000707016	0.000536272	0.000538484	8.08739e-05
		1808	2906	1763	2245	692	523	1603	1176	1269		2075	1436	1127	835	622	1469	1911	1549			1808	0.00102053	0.000665539	0.000858392	0.000190122	0.000138015	0.00051901	0.000339218	0.000402586	0.000516676	0.000110787		0.000754777	0.000545318	0.000427524	0.000285152	0.000142214	0.000475892	0.000702239	0.000532832	0.000483243	7.15519e-05
		1809	2478	1627	2084	575	488	1578	1133	1243		1556	1073	966	584	573	1461	1895	1533			1809	0.000870225	0.000614199	0.000796833	0.000157977	0.000128779	0.000510915	0.000326815	0.000394337	0.00047501	9.72187e-05		0.000565992	0.000407469	0.000366449	0.000199436	0.000131011	0.0004733	0.000696359	0.000527329	0.000420918	6.64441e-05
		1810	2178	1529	1945	516	449	1517	1067	1189		1346	889	863	466	540	1409	1840	1495			1810	0.00076487	0.000577204	0.000743685	0.000141767	0.000118487	0.000491165	0.000307777	0.000377206	0.00044027	8.79272e-05		0.000489605	0.000337596	0.000327376	0.000159139	0.000123466	0.000456454	0.000676148	0.000514257	0.000385505	6.58057e-05
		1811	1794	1216	1526	335	354	1330	935	1058		831	544	642	327	431	1280	1692	1322			1811	0.000630017	0.000459045	0.000583477	9.20387e-05	9.34175e-05	0.000430619	0.000269702	0.000335647	0.000361745	7.1868e-05		0.000302275	0.000206583	0.000243541	0.00011167	9.8544e-05	0.000414664	0.000621762	0.000454748	0.000306723	6.38408e-05
		1812	1688	1141	1443	295	335	1265	888	1016		730	484	590	297	397	1207	1632	1261			1812	0.000592792	0.000430732	0.000551742	8.1049e-05	8.84035e-05	0.000409574	0.000256144	0.000322322	0.000341595	6.80719e-05		0.000265536	0.000183798	0.000223815	0.000101425	9.07702e-05	0.000391015	0.000599714	0.000433765	0.00028623	6.24203e-05
		1813	1556	1060	1358	267	299	1222	825	981		620	412	533	234	349	1125	1542	1207			1813	0.000546436	0.000400154	0.000519241	7.33562e-05	7.89035e-05	0.000395652	0.000237972	0.000311219	0.000320367	6.39313e-05		0.000225524	0.000156456	0.000202192	7.99109e-05	7.97955e-05	0.000364451	0.000566642	0.00041519	0.00026127	6.11157e-05
		1814	1412	967	1242	211	254	1150	744	912		536	354	479	183	294	1034	1409	1118			1814	0.000495866	0.000365046	0.000474888	5.79706e-05	6.70284e-05	0.00037234	0.000214607	0.000289329	0.000292134	5.94887e-05		0.000194969	0.000134431	0.000181707	6.24944e-05	6.72203e-05	0.000334971	0.000517768	0.000384575	0.000234767	5.74439e-05
		1815	1386	945	1223	203	239	1122	723	899		523	343	475	172	285	1008	1379	1102			1815	0.000486736	0.000356741	0.000467623	5.57727e-05	6.307e-05	0.000363274	0.00020855	0.000285205	0.000285871	5.87e-05		0.00019024	0.000130254	0.00018019	5.87379e-05	6.51625e-05	0.000326548	0.000506744	0.000379071	0.000229618	5.64805e-05
		1816	1350	928	1193	197	230	1115	712	892		498	325	464	157	283	983	1349	1075			1816	0.000474093	0.000350324	0.000456152	5.41243e-05	6.0695e-05	0.000361008	0.000205377	0.000282984	0.000280595	5.7461e-05		0.000181147	0.000123418	0.000176017	5.36154e-05	6.47052e-05	0.000318449	0.00049572	0.000369784	0.000222857	5.5526e-05
		1817	1311	906	1175	187	214	1101	698	880		474	306	454	144	267	951	1307	1042			1817	0.000460397	0.000342019	0.00044927	5.13768e-05	5.64727e-05	0.000356475	0.000201339	0.000279177	0.000274566	5.65489e-05		0.000172417	0.000116203	0.000172223	4.91759e-05	6.1047e-05	0.000308082	0.000480286	0.000358432	0.000214733	5.41519e-05
		1818	1263	870	1141	173	208	1086	682	858		444	287	432	136	247	907	1264	1009			1818	0.000443541	0.000328428	0.00043627	4.75304e-05	5.48894e-05	0.000351619	0.000196723	0.000272197	0.0002664	5.49144e-05		0.000161504	0.000108988	0.000163878	4.64439e-05	5.64742e-05	0.000293828	0.000464484	0.000347081	0.000205335	5.26799e-05
		1819	1161	789	1057	165	194	1047	652	832		387	250	391	120	225	829	1207	942			1819	0.00040772	0.000297851	0.000404152	4.53325e-05	5.11949e-05	0.000338991	0.00018807	0.000263949	0.000249658	5.07601e-05		0.00014077	9.4937e-05	0.000148325	4.09799e-05	5.14441e-05	0.00026856	0.000443539	0.000324034	0.000189073	5.05353e-05
		1820	1016	650	914	143	151	946	605	776		332	216	333	92	172	746	1139	857			1820	0.000356799	0.000245378	0.000349475	3.92882e-05	3.98476e-05	0.00030629	0.000174513	0.000246183	0.000219722	4.46081e-05		0.000120764	8.20255e-05	0.000126322	3.1418e-05	3.93261e-05	0.000241671	0.00041855	0.000294795	0.000169359	4.8336e-05
		Maximum Read Depth in 18S rRNA	2847541	2648979	2615354	3639773	3789441	3088574	3466795	3152124	Maximum Read Depth in 18S rRNA	2749156	2633326	2636110	2928262	4373681	3086838	2721297	2907106
Figure S7B (Right)
		Fraction of Reads Cleaved After Indicated Nucleotide
		Gal::Pno1; Gal::Dim1 + Dim1-E85A + Pno1
	Miscleavage Position	1	2	3	4	5	6	7	8	Average	Standard Error of the Mean (SEM)
	18S +1	0.000634231	0.000308043	0.00026153	0.00031513	0.00024463	0.00017613	0.00023566	0.00021541	0.000298846	5.05643e-05
	18S +2	0.000373305	0.000105324	0.0001128	0.00016622	7.9695e-05	2.7845e-05	4.5575e-05	4.8221e-05	0.000119873	3.95003e-05
	18S +3	0.000485331	0.000135524	0.0001495	0.00018985	9.1042e-05	4.9861e-05	5.8267e-05	5.4884e-05	0.000151782	5.09175e-05
	18S +4	0.000709033	0.000205362	0.00022215	0.00021677	8.4973e-05	2.5902e-05	2.6249e-05	2.7918e-05	0.000189795	8.0448e-05
	18S +5	0.000478659	9.2866e-05	0.00012541	0.0001099	5.2514e-05	2.0722e-05	1.7307e-05	1.7131e-05	0.000114314	5.42454e-05
	Total	0.00268056	0.000847119	0.00087139	0.00099786	0.00055285	0.00030046	0.00038306	0.00036356	0.000874607	0.000274297
		Fraction of Reads Cleaved After Indicated Nucleotide
		Gal::Pno1; Gal::Dim1 + Dim1-E85A + Pno1-KKKF
	Miscleavage Position	1	2	3	4	5	6	7	8	Average	Standard Error of the Mean (SEM)
	18S +1	0.00042413	0.00040709	0.00037176	0.00033023	0.00023687	0.0002028	0.0002146	0.00024217	0.000303706	3.18761e-05
	18S +2	0.00026335	0.00020962	0.00022647	0.0002288	5.7617e-05	3.5635e-05	5.7693e-05	4.9534e-05	0.00014109	3.48601e-05
	18S +3	0.000295	0.00020203	0.00018436	0.0001909	5.9904e-05	4.2438e-05	4.8506e-05	5.263e-05	0.000134471	3.38392e-05
	18S +4	0.00048524	0.00043937	0.00032889	0.00036233	9.0084e-05	2.5269e-05	3.0868e-05	3.4054e-05	0.000224513	7.01494e-05
	18S +5	0.00025244	0.0002457	0.00017602	0.00018441	4.5499e-05	1.1662e-05	2.0946e-05	1.7199e-05	0.000119234	3.73904e-05
	Total	0.00172016	0.0015038	0.0012875	0.00129667	0.00048998	0.0003178	0.00037262	0.00039558	0.000923014	0.000206162

## Sheet: Figure S7C
Figure S7C (Left)
		Fold Change in Miscleavage Relative to Pno1
		Gal::Pno1; Gal::Dim1 + Dim1-E85A + Pno1
	Miscleavage Position	1	2	3	4	5	6	7	8	Average	Standard Error of the Mean (SEM)
	18S -5	1.26155	1.00754	0.730906	0.956459	0.852449	0.712705	1.09145	1.19584	0.976114	0.0718674
	18S -4	1.44113	0.84043	0.718444	0.874884	0.782426	0.675752	1.10508	1.21916	0.957164	0.0956046
	18S -3	1.07626	1.11488	0.808851	1.12965	0.76376	0.814551	1.04614	1.13931	0.986676	0.0571147
	18S -2	1.06417	1.18548	0.750353	1.1174	0.928119	0.702072	0.953766	1.34416	1.00569	0.0766347
	18S -1	1.18847	0.990087	0.821445	1.02745	1.03755	0.777336	1.11578	1.10688	1.00813	0.050629
	Total	1.35263	0.901342	0.746024	0.933914	0.846056	0.728114	1.10244	1.16945	0.972496	0.0771977
		Fold Change in Miscleavage Relative to Pno1
		Gal::Pno1; Gal::Dim1 + Dim1-E85A + Pno1-KKKF
	Miscleavage Position	1	2	3	4	5	6	7	8	Average	Standard Error of the Mean (SEM)
	18S -5	1.11725	1.13452	1.15069	2.11265	1.1626	1.07898	1.26357	1.37087	1.29889	0.120826
	18S -4	1.2594	1.54883	1.16289	2.64712	1.01764	1.07076	1.12132	1.46147	1.41118	0.188437
	18S -3	1.00227	1.07516	1.19765	1.1521	1.0896	1.15085	1.38851	1.37197	1.17851	0.0487348
	18S -2	1.16007	1.11591	1.4054	1.4449	1.52908	1.19665	1.70224	1.67174	1.40325	0.0805603
	18S -1	1.02994	1.12137	1.1912	1.05947	0.861584	1.17371	1.28844	1.31444	1.13002	0.052079
	Total	1.19067	1.40899	1.1774	2.1463	1.00469	1.12408	1.22766	1.39739	1.33465	0.125239
Figure S7C (Right)
		Fold Change in Miscleavage Relative to Pno1
		Gal::Pno1; Gal::Dim1 + Dim1-E85A + Pno1
	Miscleavage Position	1	2	3	4	5	6	7	8	Average	Standard Error of the Mean (SEM)
	18S +1	1.58056	0.767673	0.651763	1.11525	0.865742	0.842463	1.12721	1.03033	0.997624	0.10225
	18S +2	1.89359	0.534255	0.572156	1.33487	0.640015	0.686722	1.12401	1.18927	0.996861	0.168474
	18S +3	1.89002	0.527771	0.582205	1.4279	0.684758	0.917624	1.07232	1.01005	1.01408	0.162717
	18S +4	1.87155	0.54207	0.586382	1.30826	0.512828	0.970489	0.983495	1.04602	0.977636	0.162129
	18S +5	2.06041	0.399746	0.539847	1.44955	0.692667	1.12699	0.941285	0.931726	1.01778	0.189678
	Total	1.82804	0.577703	0.594257	1.27678	0.707379	0.86085	1.09751	1.04164	0.99802	0.147686
		Fold Change in Miscleavage Relative to Pno1
		Gal::Pno1; Gal::Dim1 + Dim1-E85A + Pno1-KKKF
	Miscleavage Position	1	2	3	4	5	6	7	8	Average	Standard Error of the Mean (SEM)
	18S +1	1.05697	1.01451	0.92646	1.16869	0.838295	0.969997	1.02647	1.1583	1.01996	0.0394024
	18S +2	1.33586	1.0633	1.14877	1.83748	0.462713	0.878859	1.42287	1.22164	1.17144	0.142458
	18S +3	1.14882	0.786749	0.717963	1.4358	0.450554	0.781015	0.892688	0.968573	0.89777	0.104867
	18S +4	1.28083	1.15975	0.868141	2.18674	0.543676	0.946759	1.15654	1.27595	1.1773	0.168521
	18S +5	1.08664	1.05761	0.757673	2.43237	0.60014	0.634288	1.13919	0.935421	1.08042	0.206445
	Total	1.17309	1.02554	0.878029	1.65911	0.626929	0.910527	1.06758	1.13338	1.05927	0.105335

## Sheet: Figure S7D
Figure S7D (Left)
			Read Depth			Read Depth					Read Depth as a Fraction of Aligned Reads					Read Depth as a Fraction of Aligned Reads
			Gal::Pno1; Gal::Dim1 + Dim1-E85A + Pno1			Gal::Pno1; Gal::Dim1 + Dim1-E85A + Pno1-KKKF					Gal::Pno1; Gal::Dim1 + Dim1-E85A + Pno1					Gal::Pno1; Gal::Dim1 + Dim1-E85A + Pno1-KKKF
		Nucleotide Position	1	2		1	2			Nucleotide Position	1	2	Average	Standard Error of the Mean (SEM)		1	2	Average	Standard Error of the Mean (SEM)
	3' 25S rRNA	3376	2842573	2845589		2562765	2616442		3' 25S rRNA	3376	1	1	1	0		0.999999	1	1	3.90203e-07
		3377	2842557	2845576		2562750	2616427			3377	0.999994	0.999995	0.999995	5.30115e-07		0.999993	0.999994	0.999994	4.50239e-07
		3378	2842538	2845538		2562740	2616405			3378	0.999988	0.999982	0.999985	2.80484e-06		0.999989	0.999986	0.999988	1.80293e-06
		3379	2842573	2845588		2562766	2616437			3379	1	1	1	1.75711e-07		1	0.999998	0.999999	7.60394e-07
		3380	2842016	2845023		2562323	2615870			3380	0.999804	0.999801	0.999803	1.47755e-06		0.999827	0.999781	0.999804	2.26836e-05
		3381	2842124	2845047		2562420	2616072			3381	0.999842	0.99981	0.999826	1.62574e-05		0.999865	0.999859	0.999862	3.00644e-06
		3382	2841953	2844792		2562267	2615892			3382	0.999782	0.99972	0.999751	3.09852e-05		0.999805	0.99979	0.999797	7.55375e-06
		3383	2841705	2844596		2562088	2615623			3383	0.999695	0.999651	0.999673	2.1802e-05		0.999735	0.999687	0.999711	2.40363e-05
		3384	2842532	2845540		2562725	2616380			3384	0.999986	0.999983	0.999984	1.39804e-06		0.999984	0.999976	0.99998	3.65388e-06
		3385	2842530	2845562		2562754	2616391			3385	0.999985	0.999991	0.999988	2.81939e-06		0.999995	0.999981	0.999988	7.20974e-06
		3386	2842475	2845529		2562712	2616335			3386	0.999966	0.999979	0.999972	6.69527e-06		0.999978	0.999959	0.999969	9.71703e-06
		3387	2842507	2845552		2562732	2616375			3387	0.999977	0.999987	0.999982	5.10791e-06		0.999986	0.999974	0.99998	5.97509e-06
		3388	2842262	2845300		2562591	2616141			3388	0.999891	0.999898	0.999895	3.92361e-06		0.999931	0.999885	0.999908	2.3183e-05
		3389	2841866	2844965		2562282	2615768			3389	0.999751	0.999781	0.999766	1.47158e-05		0.999811	0.999742	0.999777	3.41766e-05
		3390	2840946	2843910		2561499	2614876			3390	0.999428	0.99941	0.999419	8.83363e-06		0.999505	0.999402	0.999453	5.18725e-05
		3391	2840742	2843813		2561376	2614860			3391	0.999356	0.999376	0.999366	1.00054e-05		0.999457	0.999395	0.999426	3.09326e-05
		3392	2839928	2843008		2560771	2614101			3392	0.99907	0.999093	0.999081	1.17386e-05		0.999221	0.999105	0.999163	5.79404e-05
		3393	2838966	2841711		2560206	2612939			3393	0.998731	0.998637	0.998684	4.69451e-05		0.999001	0.998661	0.998831	0.000169765
		3394	2838042	2840872		2559340	2612088			3394	0.998406	0.998342	0.998374	3.18374e-05		0.998663	0.998336	0.998499	0.000163433
		3395	2835022	2837465		2557015	2608574			3395	0.997344	0.997145	0.997244	9.92744e-05		0.997756	0.996993	0.997374	0.000381344
	Canonical 3'-end of 25S rRNA	3396	2772750	2765860		2505313	2544789		Canonical 3'-end of 25S rRNA	3396	0.975437	0.971982	0.973709	0.00172757		0.977581	0.972614	0.975098	0.00248346
		Maximum Read Depth in 25S rRNA	2842573	2845589		2562767	2616442
Figure S7D (Middle)
			Read Depth			Read Depth					Read Depth as a Fraction of Aligned Reads					Read Depth as a Fraction of Aligned Reads
			Gal::Pno1; Gal::Dim1 + Dim1-E85A + Pno1			Gal::Pno1; Gal::Dim1 + Dim1-E85A + Pno1-KKKF					Gal::Pno1; Gal::Dim1 + Dim1-E85A + Pno1					Gal::Pno1; Gal::Dim1 + Dim1-E85A + Pno1-KKKF
		Nucleotide Position	1	2		1	2			Nucleotide Position	1	2	Average	Standard Error of the Mean (SEM)		1	2	Average	Standard Error of the Mean (SEM)
	5' ETS2	3397	22513	25033		21190	21271		5' ETS2	3397	0.00791994	0.00879712	0.00835853	0.000438593		0.00826841	0.00812974	0.00819908	6.93321e-05
		3398	6403	9093		7201	7220			3398	0.00225254	0.00319547	0.002724	0.000471468		0.00280985	0.00275947	0.00278466	2.51905e-05
		3399	3474	4995		3164	3124			3399	0.00122213	0.00175535	0.00148874	0.000266608		0.0012346	0.00119399	0.0012143	2.03076e-05
		3400	2738	3596		1986	1983			3400	0.00096321	0.00126371	0.00111346	0.000150249		0.00077494	0.0007579	0.000766422	8.52209e-06
		3401	1951	2384		1196	1257			3401	0.00068635	0.00083779	0.000762069	7.57189e-05		0.00046668	0.00048042	0.000473553	6.87017e-06
		3402	918	1029		478	510			3402	0.00032295	0.00036161	0.00034228	1.93327e-05		0.00018652	0.00019492	0.000190719	4.20202e-06
		3403	179	163		70	69			3403	6.297e-05	5.728e-05	6.01264e-05	2.84474e-06		2.731e-05	2.637e-05	2.6843e-05	4.71268e-07
		3404	39	30		16	21			3404	1.372e-05	1.054e-05	1.21313e-05	1.58867e-06		6.24e-06	8.03e-06	7.13471e-06	8.91457e-07
		3405	6	4		2	3			3405	2.11e-06	1.41e-06	1.75822e-06	3.5254e-07		7.8e-07	1.15e-06	9.63501e-07	1.83094e-07
		3406	3	4		1	3			3406	1.06e-06	1.41e-06	1.23053e-06	1.75151e-07		3.9e-07	1.15e-06	7.68399e-07	3.78196e-07
		3407	2	3		0	2			3407	7e-07	1.05e-06	8.78926e-07	1.75338e-07		0	7.6e-07	3.82198e-07	3.82198e-07
		3408	0	3		0	2			3408	0	1.05e-06	5.27132e-07	5.27132e-07		0	7.6e-07	3.82198e-07	3.82198e-07
		3409	0	3		0	2			3409	0	1.05e-06	5.27132e-07	5.27132e-07		0	7.6e-07	3.82198e-07	3.82198e-07
		3410	0	0		0	1			3410	0	0	0	0		0	3.8e-07	1.91099e-07	1.91099e-07
		3411	0	0		0	0			3411	0	0	0	0		0	0	0	0
		3412	0	0		0	0			3412	0	0	0	0		0	0	0	0
		3413	0	0		0	0			3413	0	0	0	0		0	0	0	0
		3414	0	0		0	0			3414	0	0	0	0		0	0	0	0
		3415	0	0		0	0			3415	0	0	0	0		0	0	0	0
		3416	0	0		0	0			3416	0	0	0	0		0	0	0	0
		Maximum Read Depth in 25S rRNA	2842573	2845589		2562767	2616442
Figure S7D (Right)
		Fraction of Miscleaved Reads
		Gal::Pno1; Gal::Dim1 + Dim1-E85A
	Biological Replicates	Pno1	Pno1-KKKF
	1	0.0324832	0.0306871
	2	0.0368149	0.0355154
	Average	0.0346491	0.0331013
	Standard Error of the Mean (SEM)	0.00216581	0.00241413
