# Supplementary material for: The kinase Rio1 and a ribosome collision-dependent decay pathway survey the integrity of 18S rRNA cleavage
Source: PLoS Biol. 2024 Apr 25;22(4):e3001767. doi: 10.1371/journal.pbio.3001767 (PMC11045238; doi:10.1371/journal.pbio.3001767)
Supplement: S12 Data — (XLSX) [file pbio.3001767.s025.xlsx]

## Sheet: Sheet1
Figure S10
		Assembly Protein Expression Normalized to Ribosomal Protein mRNA Expression in Cancer Tissue Normalized to Normal Tissue
	Patient	RIOK1	RIOK2	hCINAP (Fap7)
	1	0.216718	0.0732304	0.0856143
	2	0.265584	0.0947606	0.0863054
	3	0.267787	0.118726	0.117294
	4	0.29232	0.142376	0.14748
	5	0.299186	0.204242	0.172331
	6	0.306469	0.22501	0.182547
	7	0.317084	0.235528	0.19593
	8	0.31889	0.248824	0.214017
	9	0.319696	0.251777	0.249651
	10	0.324571	0.260347	0.26238
	11	0.332147	0.269877	0.26302
	12	0.345845	0.275453	0.295187
	13	0.346595	0.275765	0.305646
	14	0.349989	0.295455	0.318548
	15	0.359658	0.303781	0.333844
	16	0.374977	0.309996	0.335711
	17	0.379061	0.310267	0.378283
	18	0.388847	0.316673	0.380567
	19	0.40518	0.35636	0.380813
	20	0.41391	0.37717	0.385345
	21	0.417543	0.385493	0.395921
	22	0.428229	0.385852	0.396923
	23	0.429459	0.38876	0.398146
	24	0.43373	0.394888	0.406133
	25	0.434555	0.432778	0.407894
	26	0.435125	0.435775	0.411438
	27	0.437957	0.437852	0.418216
	28	0.444146	0.442146	0.420764
	29	0.448056	0.442822	0.42538
	30	0.458026	0.45242	0.428758
	31	0.467462	0.453363	0.447487
	32	0.47022	0.454535	0.450515
	33	0.481491	0.455137	0.454908
	34	0.485336	0.456345	0.46233
	35	0.492237	0.461163	0.463607
	36	0.496052	0.483781	0.468644
	37	0.510835	0.48597	0.478673
	38	0.525218	0.487298	0.484611
	39	0.529292	0.487878	0.488433
	40	0.538807	0.490005	0.488944
	41	0.543959	0.495304	0.490723
	42	0.544311	0.515014	0.492817
	43	0.555599	0.521407	0.496694
	44	0.560352	0.523441	0.497688
	45	0.594625	0.523651	0.501307
	46	0.594917	0.523686	0.50646
	47	0.600833	0.52941	0.507257
	48	0.600981	0.533312	0.507451
	49	0.607369	0.536723	0.507815
	50	0.62097	0.537714	0.508597
	51	0.621266	0.543091	0.509635
	52	0.621329	0.546469	0.512141
	53	0.625854	0.550451	0.512676
	54	0.631026	0.553879	0.512905
	55	0.637946	0.56042	0.516241
	56	0.639403	0.563477	0.516407
	57	0.643519	0.591472	0.522108
	58	0.644426	0.595028	0.526158
	59	0.647937	0.596804	0.528479
	60	0.64876	0.598294	0.538357
	61	0.655591	0.602271	0.542415
	62	0.656802	0.604755	0.550396
	63	0.657017	0.607885	0.550957
	64	0.661634	0.614172	0.553953
	65	0.667216	0.616257	0.554268
	66	0.669114	0.617437	0.556297
	67	0.67684	0.619543	0.560975
	68	0.683857	0.622445	0.564191
	69	0.68454	0.624277	0.564848
	70	0.684693	0.63449	0.565209
	71	0.685035	0.635253	0.566074
	72	0.688265	0.636532	0.566986
	73	0.689819	0.640401	0.567309
	74	0.706455	0.64053	0.571461
	75	0.706846	0.642647	0.571687
	76	0.716018	0.644514	0.574158
	77	0.720867	0.64708	0.575025
	78	0.739511	0.648936	0.578348
	79	0.740267	0.650751	0.580354
	80	0.746958	0.651142	0.581592
	81	0.747286	0.651706	0.59484
	82	0.748133	0.652207	0.599905
	83	0.753408	0.656284	0.600245
	84	0.762981	0.657821	0.601238
	85	0.763827	0.65876	0.604973
	86	0.767415	0.662703	0.613575
	87	0.769852	0.663522	0.61819
	88	0.771385	0.665819	0.623357
	89	0.77251	0.666058	0.626901
	90	0.784894	0.670409	0.628256
	91	0.787205	0.676529	0.630822
	92	0.802029	0.678224	0.632156
	93	0.807076	0.679462	0.633317
	94	0.808012	0.680719	0.634986
	95	0.808594	0.685645	0.641438
	96	0.811679	0.690392	0.643748
	97	0.815001	0.700597	0.644875
	98	0.81511	0.70198	0.647012
	99	0.81601	0.707045	0.647989
	100	0.824548	0.70792	0.651823
	101	0.827926	0.71085	0.653658
	102	0.84045	0.711257	0.660521
	103	0.841528	0.712357	0.661199
	104	0.845197	0.71652	0.661409
	105	0.849012	0.720991	0.662913
	106	0.852496	0.725552	0.663141
	107	0.861243	0.726725	0.663478
	108	0.866477	0.729241	0.669934
	109	0.870639	0.731655	0.674866
	110	0.882054	0.731937	0.676683
	111	0.882113	0.731972	0.678279
	112	0.882846	0.733778	0.678505
	113	0.883709	0.741139	0.682301
	114	0.889287	0.741536	0.688453
	115	0.892016	0.747345	0.691853
	116	0.892038	0.748345	0.70318
	117	0.893821	0.748358	0.708368
	118	0.903634	0.749034	0.719687
	119	0.905067	0.749119	0.722145
	120	0.914307	0.755778	0.726004
	121	0.920495	0.768726	0.730974
	122	0.931045	0.77303	0.731764
	123	0.932058	0.776237	0.734716
	124	0.942978	0.777015	0.735843
	125	0.943647	0.778165	0.743951
	126	0.943801	0.779351	0.750416
	127	0.949248	0.782274	0.751958
	128	0.94981	0.783273	0.757067
	129	0.954815	0.78757	0.7589
	130	0.955138	0.789911	0.760255
	131	0.962197	0.789977	0.76111
	132	0.962871	0.790577	0.767262
	133	0.963485	0.790679	0.776499
	134	0.963765	0.792277	0.776857
	135	0.965835	0.792468	0.777991
	136	0.971353	0.793678	0.781363
	137	0.973322	0.797553	0.783301
	138	0.973558	0.80279	0.788193
	139	0.977467	0.804018	0.79101
	140	0.983264	0.80839	0.797443
	141	0.989483	0.809644	0.800849
	142	0.99025	0.815332	0.807548
	143	0.992394	0.815756	0.809226
	144	0.996139	0.817248	0.814427
	145	0.999112	0.818824	0.824716
	146	1.00208	0.82021	0.830678
	147	1.00488	0.82221	0.831799
	148	1.00582	0.824287	0.835567
	149	1.01925	0.825171	0.836495
	150	1.02761	0.827265	0.838849
	151	1.03295	0.833589	0.839109
	152	1.03544	0.835797	0.841284
	153	1.03767	0.841915	0.842916
	154	1.04198	0.842288	0.850181
	155	1.0426	0.84665	0.850256
	156	1.04524	0.851586	0.850714
	157	1.04536	0.857228	0.86034
	158	1.04698	0.860728	0.861791
	159	1.05606	0.875123	0.86355
	160	1.06557	0.876625	0.865511
	161	1.07838	0.887259	0.868913
	162	1.08113	0.887941	0.873691
	163	1.10506	0.888841	0.874645
	164	1.11135	0.889142	0.875084
	165	1.11586	0.890776	0.877269
	166	1.11703	0.895213	0.878305
	167	1.12283	0.902712	0.882285
	168	1.12326	0.905432	0.895266
	169	1.13117	0.91272	0.896132
	170	1.13396	0.917314	0.899876
	171	1.13851	0.918372	0.900369
	172	1.14878	0.929659	0.90865
	173	1.1528	0.93015	0.913588
	174	1.15979	0.93077	0.914189
	175	1.16753	0.933329	0.914815
	176	1.17376	0.933491	0.919692
	177	1.1752	0.937672	0.925854
	178	1.17547	0.93937	0.929393
	179	1.18146	0.943288	0.931467
	180	1.18153	0.943717	0.933276
	181	1.18262	0.946441	0.937546
	182	1.18511	0.951009	0.938926
	183	1.20077	0.954349	0.9399
	184	1.21299	0.958035	0.943666
	185	1.2182	0.95942	0.943867
	186	1.22646	0.960867	0.94889
	187	1.2323	0.962296	0.949513
	188	1.23232	0.96487	0.951565
	189	1.23418	0.96501	0.953695
	190	1.23549	0.96655	0.959848
	191	1.23828	0.966959	0.961528
	192	1.24083	0.97018	0.968748
	193	1.24741	0.980997	0.971375
	194	1.25797	0.983022	0.975386
	195	1.2582	0.983652	0.983551
	196	1.26667	0.986558	0.984773
	197	1.27966	0.99085	0.987416
	198	1.28567	0.993312	0.992096
	199	1.29443	0.997985	1.00245
	200	1.31557	0.999643	1.00311
	201	1.31625	1.0129	1.0184
	202	1.31754	1.01401	1.0228
	203	1.31946	1.01456	1.0273
	204	1.3248	1.02475	1.02739
	205	1.32666	1.02542	1.02861
	206	1.33481	1.02928	1.03038
	207	1.3358	1.03213	1.04216
	208	1.34194	1.03544	1.0567
	209	1.34425	1.03778	1.0673
	210	1.34674	1.03806	1.07227
	211	1.35116	1.04245	1.07619
	212	1.35906	1.04893	1.08292
	213	1.35965	1.05141	1.08507
	214	1.37612	1.05144	1.08519
	215	1.3899	1.05538	1.09201
	216	1.40124	1.05735	1.0971
	217	1.40259	1.06933	1.09725
	218	1.40329	1.09975	1.10066
	219	1.40754	1.11211	1.10191
	220	1.41055	1.11712	1.10858
	221	1.42895	1.12911	1.11082
	222	1.43664	1.13694	1.11129
	223	1.44022	1.13695	1.11382
	224	1.44161	1.14688	1.11519
	225	1.44826	1.15148	1.11683
	226	1.45624	1.15386	1.11699
	227	1.46202	1.1544	1.13895
	228	1.46998	1.1698	1.14049
	229	1.47166	1.17283	1.15397
	230	1.47801	1.1729	1.15721
	231	1.48525	1.17305	1.1634
	232	1.48611	1.19096	1.16524
	233	1.4891	1.19271	1.18168
	234	1.49218	1.1981	1.18386
	235	1.49702	1.2076	1.18392
	236	1.49727	1.20872	1.18531
	237	1.50192	1.21102	1.18577
	238	1.5047	1.2116	1.19349
	239	1.5079	1.21287	1.19358
	240	1.51113	1.21693	1.19452
	241	1.5123	1.22011	1.19474
	242	1.51476	1.22124	1.19863
	243	1.51983	1.22299	1.20131
	244	1.52139	1.23011	1.20503
	245	1.5405	1.2305	1.20789
	246	1.54366	1.23522	1.20909
	247	1.5502	1.23957	1.22427
	248	1.55352	1.24128	1.22448
	249	1.56126	1.24182	1.23168
	250	1.56623	1.24388	1.24221
	251	1.57794	1.24616	1.24293
	252	1.58014	1.25489	1.2476
	253	1.58211	1.25637	1.2482
	254	1.58313	1.25656	1.25564
	255	1.58724	1.26968	1.25695
	256	1.62977	1.27374	1.26512
	257	1.6499	1.27877	1.26817
	258	1.65725	1.27918	1.27028
	259	1.70458	1.29396	1.28832
	260	1.71204	1.29533	1.28839
	261	1.71233	1.31299	1.29345
	262	1.71423	1.31508	1.29866
	263	1.73626	1.3324	1.2994
	264	1.74615	1.33834	1.30091
	265	1.77983	1.3494	1.30146
	266	1.79904	1.3543	1.30357
	267	1.80132	1.36932	1.30514
	268	1.80867	1.37398	1.31236
	269	1.83778	1.37707	1.31779
	270	1.85221	1.38448	1.33334
	271	1.86901	1.38962	1.3343
	272	1.87053	1.39738	1.33903
	273	1.9022	1.40534	1.35434
	274	1.90692	1.44864	1.35546
	275	1.91863	1.45468	1.39511
	276	1.92102	1.4657	1.4067
	277	1.92725	1.46587	1.41144
	278	1.93258	1.4861	1.41219
	279	1.93856	1.4894	1.41438
	280	1.94595	1.5254	1.41624
	281	1.94775	1.55026	1.41998
	282	1.95043	1.55511	1.42309
	283	1.96138	1.56072	1.43463
	284	1.99572	1.56992	1.43649
	285	1.99952	1.57886	1.45725
	286	2.0203	1.59096	1.45835
	287	2.03467	1.60942	1.48151
	288	2.0722	1.62405	1.5119
	289	2.09082	1.6243	1.51704
	290	2.09678	1.67015	1.52657
	291	2.12863	1.68802	1.52985
	292	2.16227	1.69798	1.53263
	293	2.18256	1.71537	1.54552
	294	2.2141	1.71799	1.55118
	295	2.27917	1.72719	1.60337
	296	2.28241	1.72965	1.64331
	297	2.31838	1.73884	1.64442
	298	2.39667	1.74635	1.71246
	299	2.41169	1.76338	1.73401
	300	2.44466	1.78104	1.73922
	301	2.53012	1.81523	1.74915
	302	2.54057	1.82201	1.74957
	303	2.63544	1.8436	1.75574
	304	2.71577	1.8549	1.75703
	305	2.77563	1.86123	1.79863
	306	2.79629	1.87095	1.83335
	307	2.8714	1.872	1.85038
	308	2.88214	1.87656	1.85218
	309	2.91456	1.88762	1.85975
	310	3.0338	1.91068	1.86662
	311	3.0671	1.95996	1.88107
	312	3.10502	1.97022	1.88922
	313	3.18622	2.04466	1.96324
	314	3.2785	2.12142	1.9876
	315	3.30654	2.17522	1.99269
	316	3.36338	2.22033	2.02968
	317	3.53377	2.23589	2.04228
	318	3.60044	2.24435	2.15348
	319	3.73663	2.39679	2.17377
	320	4.01331	2.45973	2.17574
	321	4.04675	2.5177	2.22442
	322	4.16876	2.58702	2.22954
	323	4.19961	2.62359	2.2352
	324	4.56042	2.70459	2.25453
	325	4.93134	2.72437	2.30588
	326	5.16991	2.78672	2.54718
	327	5.62982	2.83141	2.76612
	328	6.32852	3.09463	3.17274
	329	7.88888	3.32607	3.40407
	330	8.03454	5.20071	3.64187
